# Supplementary material for: Evolutionary route of nasopharyngeal carcinoma metastasis and its clinical significance
Source: PubMed Central journal article supplement (PMC9899247; doi:10.1038/s41467-023-35995-2), 2023-02-04
Supplement: 41467_2023_35995_MOESM1_ESM.pdf [file 41467_2023_35995_MOESM1_ESM.pdf]

## SUPPLEMENTARY FIGURES

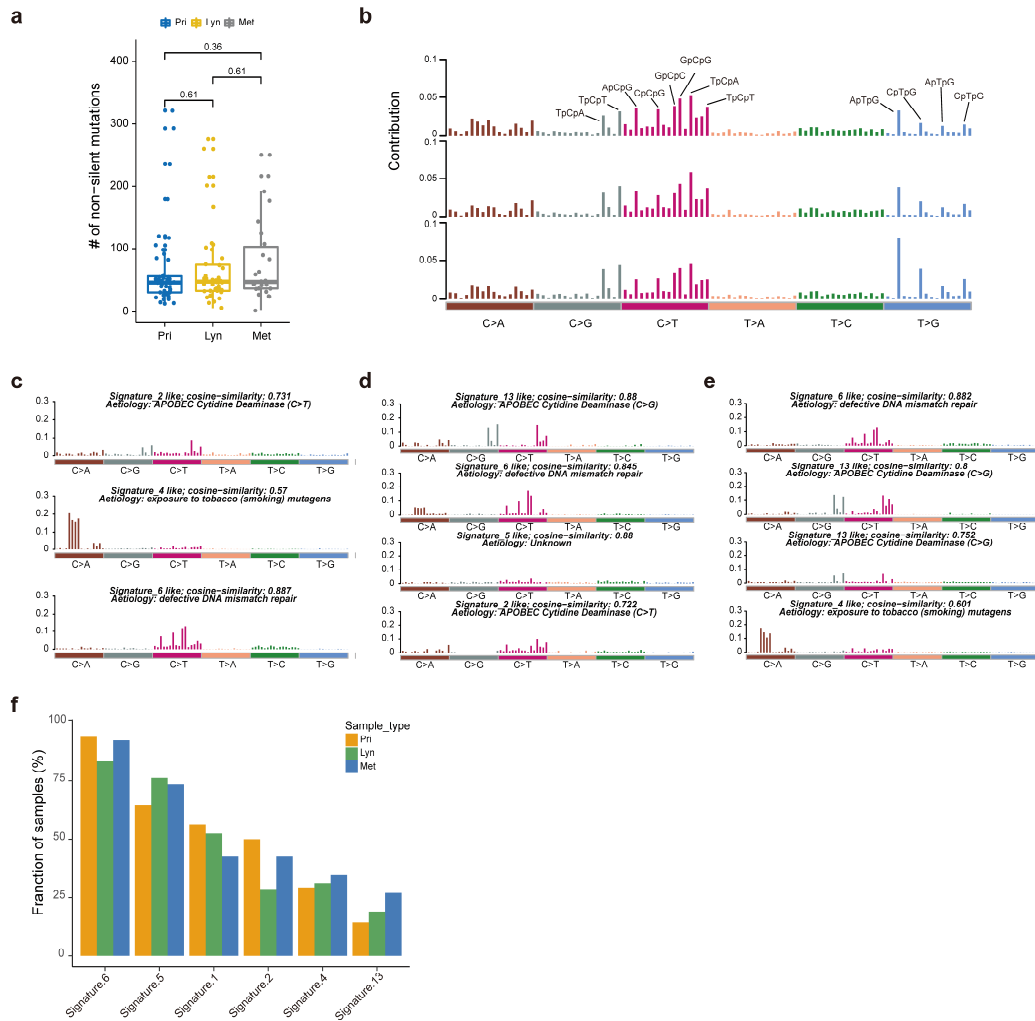

**Supplementary Fig. 1, related to Fig. 1. Mutation comparison among primary tumours,**

**and regional lymph node and distant metastases.** (a) The numbers of detected nonsilent

mutations were similar among Pri (n = 48), Lyn (n = 42) and Met (n = 26). In each box plot,

the centre line represents the median, the bounds represent the first and third quartiles and

whiskers extend from the hinge to the largest value no further than 1.5 \* interquartile range

(IQR) from the hinge. A two-sided Wilcoxon signed-rank test was used to calculate P values;

“ns”:  $P \geq 0.05$ . (b) Similar mutation context (defined by the proportion of A, T, C and G

nucleotides within  $\pm 2$  bp of the variant site) for six mutation categories among Pri (top), Lyn

(middle) and Met (bottom). Remarkable mutation contexts are highlighted. (c-e) Signatures

decomposed by nonnegative matrix factorization of Pri (c), Lyn (d) and Met (e). Each signature

was compared against known signatures derived from the COSMIC database (<https://cancer.sanger.ac.uk/cosmic/signatures>), and cosine similarity was calculated to identify the best match. Signatures with a cosine similarity of less than 0.3 were filtered out. (f) Fraction of samples that contributed to the specific signature among Pri, Lyn and Met. Source data are provided as a Source Data file.

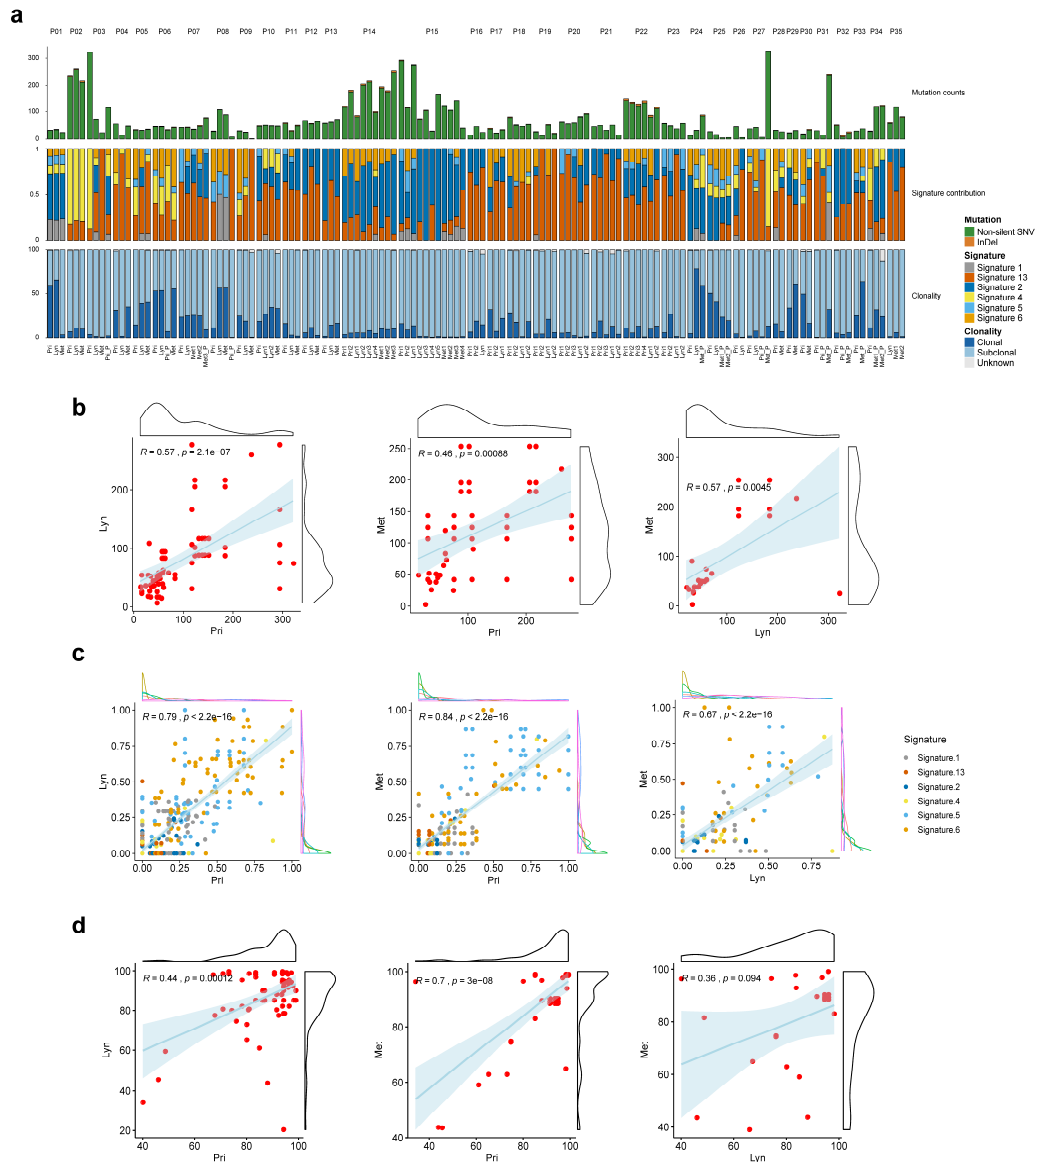

**Supplementary Fig. 2, related to Fig. 1. Longitudinal analysis of mutation signatures for each sample.** (a) Bar plot showing the number of mutations (top), composition of mutation signatures (middle) and proportion of clonal mutations (bottom) for each sample. (b) Scatter plot showing the correlation relationship of the number of mutations in primary vs. regional lymph node tumours (left), primary vs. distant metastasis tumours (middle) and regional lymph node vs. distant metastasis tumour (right). The data are shown along with 95% confidence intervals. Pearson correlation analysis was used to calculate P values (two-sided). (c) Scatter plot showing the correlation of the contribution of different mutation signatures in primary vs. regional lymph node tumours (left), primary vs. distant metastasis tumours (middle) and regional lymph node vs. distant metastasis tumours (right). The data are shown along with 95%

confidence intervals. Pearson correlation analysis was used to calculate P values (two-sided).

(d) Scatter plot showing the correlation of the proportion of subclone mutations in primary vs. regional lymph node tumours (left), primary vs. distant metastasis tumours (middle) and regional lymph node vs. distant metastasis tumours (right). The data are shown along with 95% confidence intervals. Pearson correlation analysis was used to calculate P values (two-sided).

Pri: primary tumour; Lyn: regional lymph node tumour; Met: distant metastasis tumour. Source data are provided as a Source Data file.



heterogeneity. Blue, the trunk of the tree indicates mutations shared by all regions; yellow, branches shared by at least two regions; red, the leaves where mutations were detected only in individual regions. (b) Phylogenetic trees showing ITH based on multiregion samples of NPC regional lymph nodes. (c) No significant difference in the percentage of subclonal mutations was detected among Pri (n = 48), Lyn (n = 42) and Met (n = 26). In each box plot, the centre line represents the median, the bounds represent the first and third quartiles and whiskers extend from the hinge to the largest value no further than 1.5 \* interquartile range (IQR) from the hinge. A two-sided Wilcoxon signed-rank test was used to calculate P values; “ns” :  $P \geq 0.05$ . (d) Scatter plot showing the correlation of the proportion of subclone mutations between paired Pri and Lyn/Met samples. The data are shown along with 95% confidence intervals. Pearson correlation analysis was used to calculate P values (two-sided). (e) No significant difference in the MATH score was detected among Pri (n = 48), Lyn (n = 42) and Met (n = 26). In each box plot, the centre line represents the median, the bounds represent the first and third quartiles, and whiskers extend from the hinge to the largest value no further than 1.5 \* interquartile range (IQR) from the hinge. A two-sided Wilcoxon signed-rank test was used to calculate P values. (f) Scatter plot showing the correlation of the MATH score between paired Pri and Lyn/Met samples. The data are shown along with 95% confidence intervals. Pearson correlation analysis was used to calculate P values (two-sided). Source data are provided as a Source Data file.

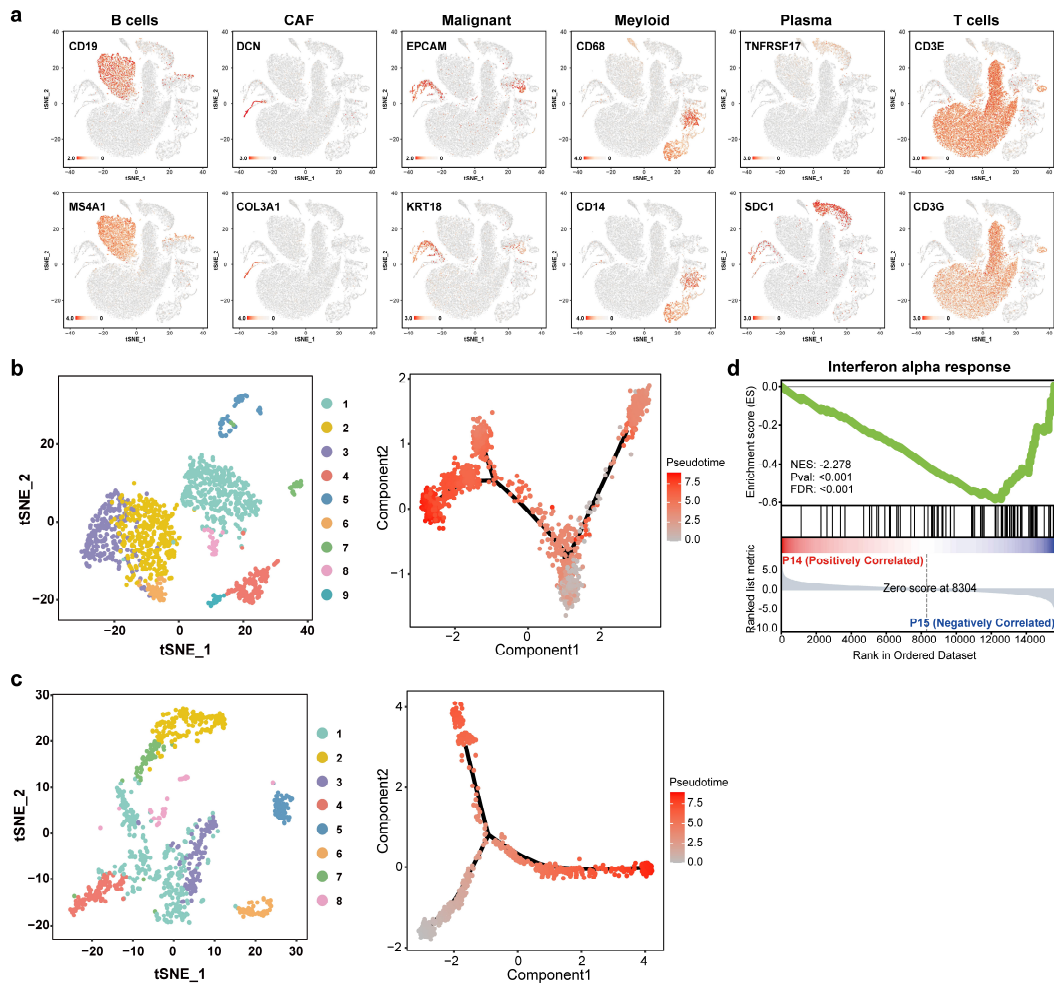

**Supplementary Fig. 4, related to Fig. 4. Cell clusters of single cells from the lymphatic and hemogenous routes.**

(a) t-SNE projection of single cells from P14 and P15, with cells coloured based on the average expression of sets of marker genes for B cells, cancer-associated fibroblasts, malignant cells, myeloid cells, plasma cells and T cells. (b & c) Pseudotime trajectory analysis of tumour cells from P14 (b) and P15 (c). The left panel shows the subclusters of tumour cells, and the right panel shows the evolutionary trajectory predicted by Monocle2, which is coloured according to the pseudotime score. (d) Hallmark GSEA of P14 primary tumour cells vs. P15 primary tumour cells using scRNA-seq data. An empirical phenotype-based permutation test (two-sided) was used to calculate the P value and false discovery rate (FDR).

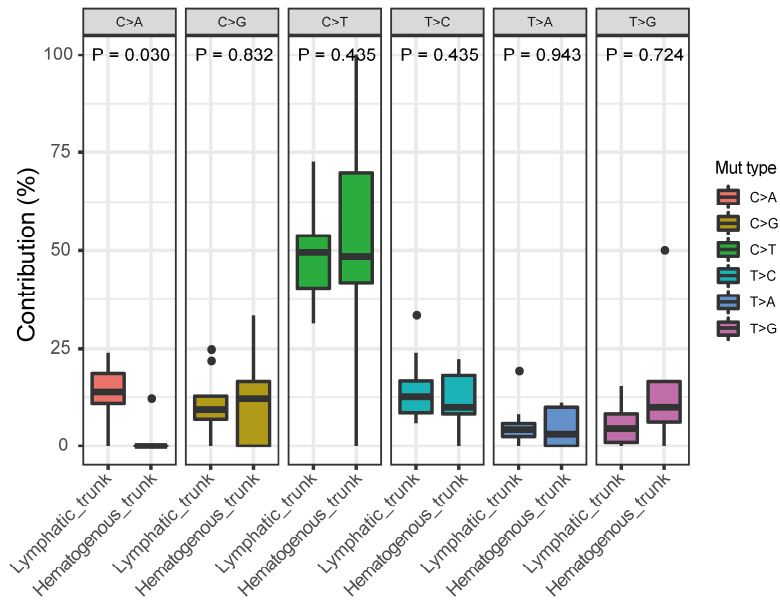

**Supplementary Fig. 5, related to Fig. 5. Trunk mutation type comparison of the lymphatic (n = 8) and hematogenous (n = 5) evolutionary models.** In each box plot, the centre line represents the median, the bounds represent the first and third quartiles and whiskers extend from the hinge to the largest value no further than 1.5 \* interquartile range (IQR) from the hinge. After adjusting for age, gender and tumor stage by using covariance analysis model, two-sided Wilcoxon signed-rank test was used to calculate the adjusted P values. Source data are provided as a Source Data file.



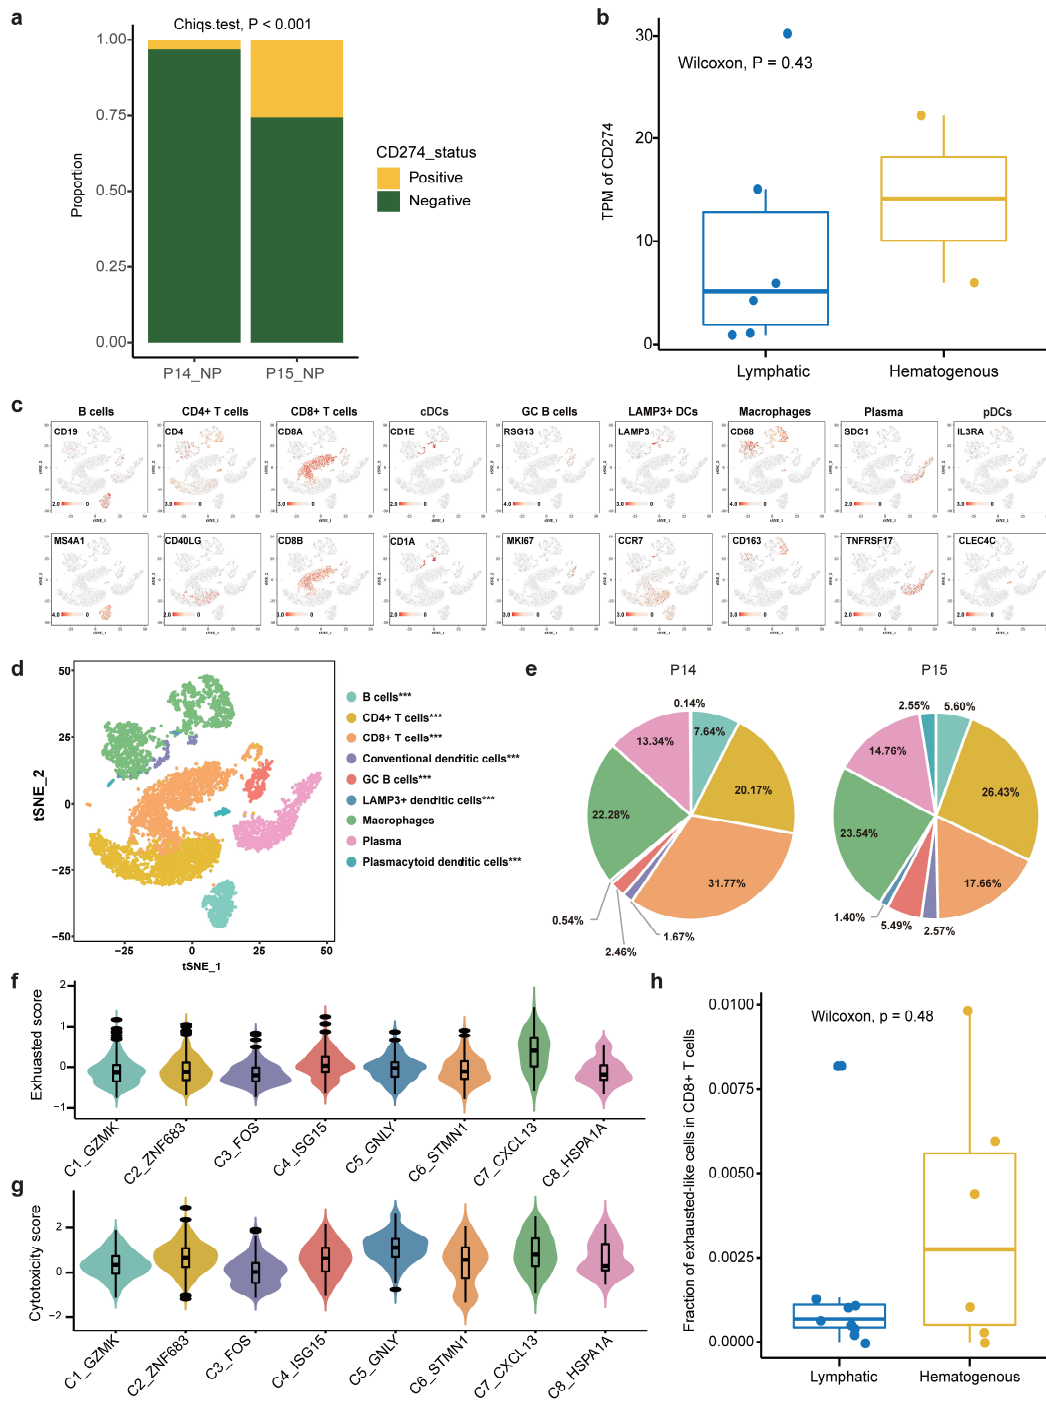

**Supplementary Fig. 6, related to Fig. 6. Microenvironment of P14 and P15 revealed by scRNA-seq.** (a) Bar plot showing the proportion of  $PD-L1^+$  tumour cells in the primary tumour of P14 and P15. A two-sided chi-square test was used to calculate the P value. (b) Box plot comparing the expression of  $PD-L1$  between patients with metastases emerging via the hematogenous route ( $n = 2$ ) and those with metastases emerging via the lymphatic route ( $n =$

6). In each box plot, the centre line represents the median, the bounds represent the first and third quartiles, and whiskers extend from the hinge to the largest value no further than 1.5 \* interquartile range (IQR) from the hinge. A two-sided Wilcoxon signed-rank test was used to calculate P values. (c) t-SNE projection of immune cells from the primary sites of P14 and P15, with cells coloured based on the average expression of sets of marker genes for B cells, CD4<sup>+</sup> T cells, CD8<sup>+</sup> T cells, classical dendritic cells (cDCs), germinal centre B cells, LAMP3<sup>+</sup> DCs, macrophages, plasma cells and plasmatic DCs. (d) t-SNE plot of immune cells from the primary sites of P14 and P15. Clusters are assigned to inferred cell types based on canonical marker expression. The statistical significance of the difference in the proportion of each cell type between P14 and P15 was measured using a two-sided Fisher exact test (“\*\*\*”,  $P < 0.001$ ). (e) Pie charts show the fraction of each immune cell type from primary tumours, which are coloured according to the cell type shown in (b). (f & g) Violin plots comparing the exhaustion score (f) and cytotoxicity score (g) among different CD8<sup>+</sup> T-cell subclusters. (h) Box plot showing the ratio of CXCL13<sup>+</sup>TIM3<sup>+</sup>CD8<sup>+</sup> T cells/CD8<sup>+</sup> T cells in primary tumour between the lymphatic (n = 8) and hematogenous (n = 5) routes via multiplex IHC staining. In each box plot, the centre line represents the median, the bounds represent the first and third quartiles, and whiskers extend from the hinge to the largest value no further than 1.5 \* interquartile range (IQR) from the hinge. A two-sided Wilcoxon signed-rank test was used to calculate P values. Source data are provided as a Source Data file.

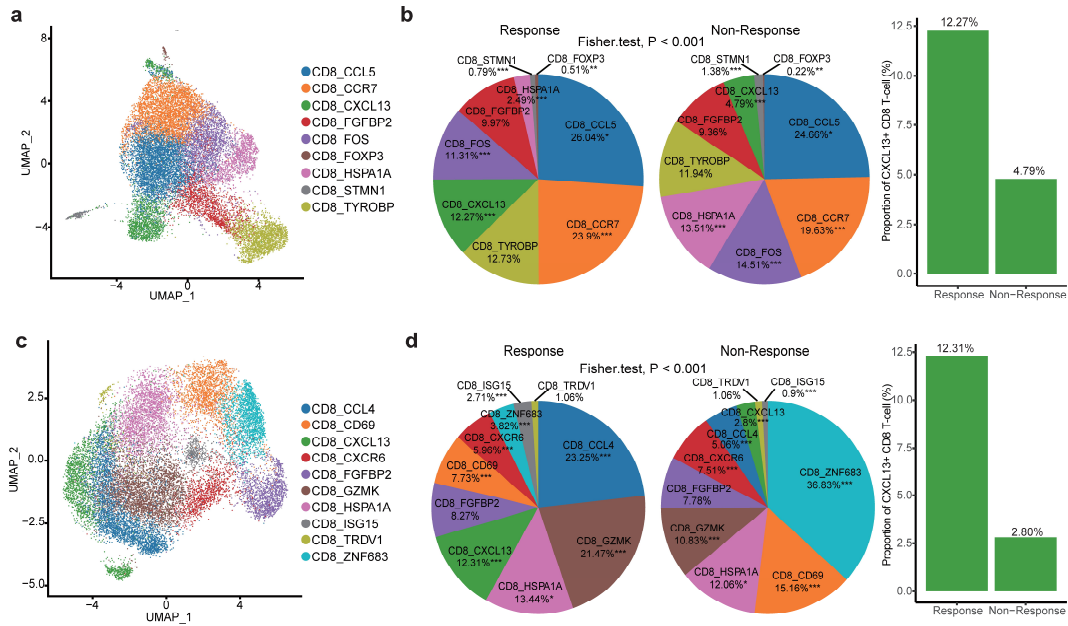

**Supplementary Fig. 7, related to Fig 6. CXCL13<sup>+</sup> CD8<sup>+</sup> T cells were enriched in patients sensitive to immunotherapy.** (a) t-SNE plot showing the clusters of CD8<sup>+</sup> T cells from BCC patients receiving PD-1 blockade (GSE123813). (b) Pie plot showing that CXCL13<sup>+</sup> CD8<sup>+</sup> T cells were significantly enriched in BCC patients who responded to PD-1 blockade, and column plot (right) showing the different proportion of CXCL13<sup>+</sup> CD8<sup>+</sup> T cells between responders and non-responders (\*, P < 0.05; \*\*, P < 0.01, \*\*\*, P < 0.001). (c) t-SNE plot showing the clusters of CD8<sup>+</sup> T cells from ccRCC patients receiving immune checkpoint blockade (PRJNA705464). (d) Pie plot showing that CXCL13<sup>+</sup> CD8<sup>+</sup> T cells were significantly enriched in ccRCC patients who responded to immune checkpoint blockade, and column plot (right) showing the different proportion of CXCL13<sup>+</sup> CD8<sup>+</sup> T cell between responders and non-responders (\*, P < 0.05; \*\*, P < 0.01, \*\*\*, P < 0.001).

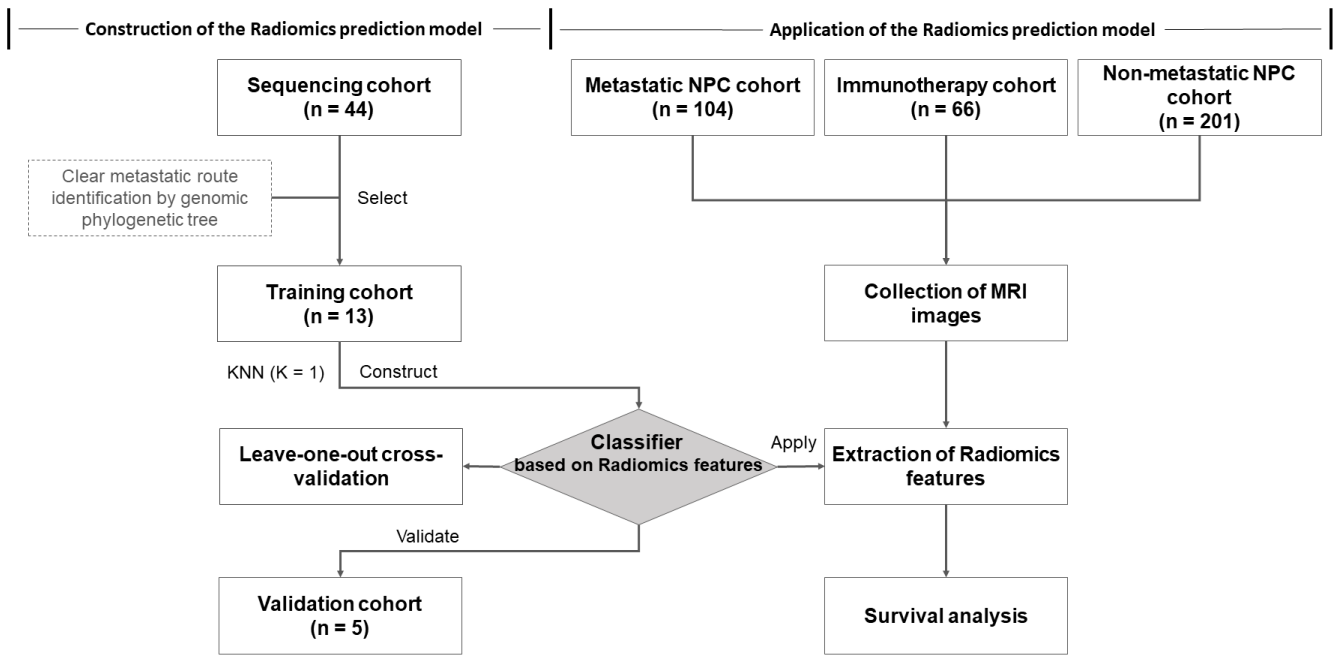

**Supplementary Fig. 8, related to Fig. 6.** Flow chart of building the prediction model based on radiomics data.

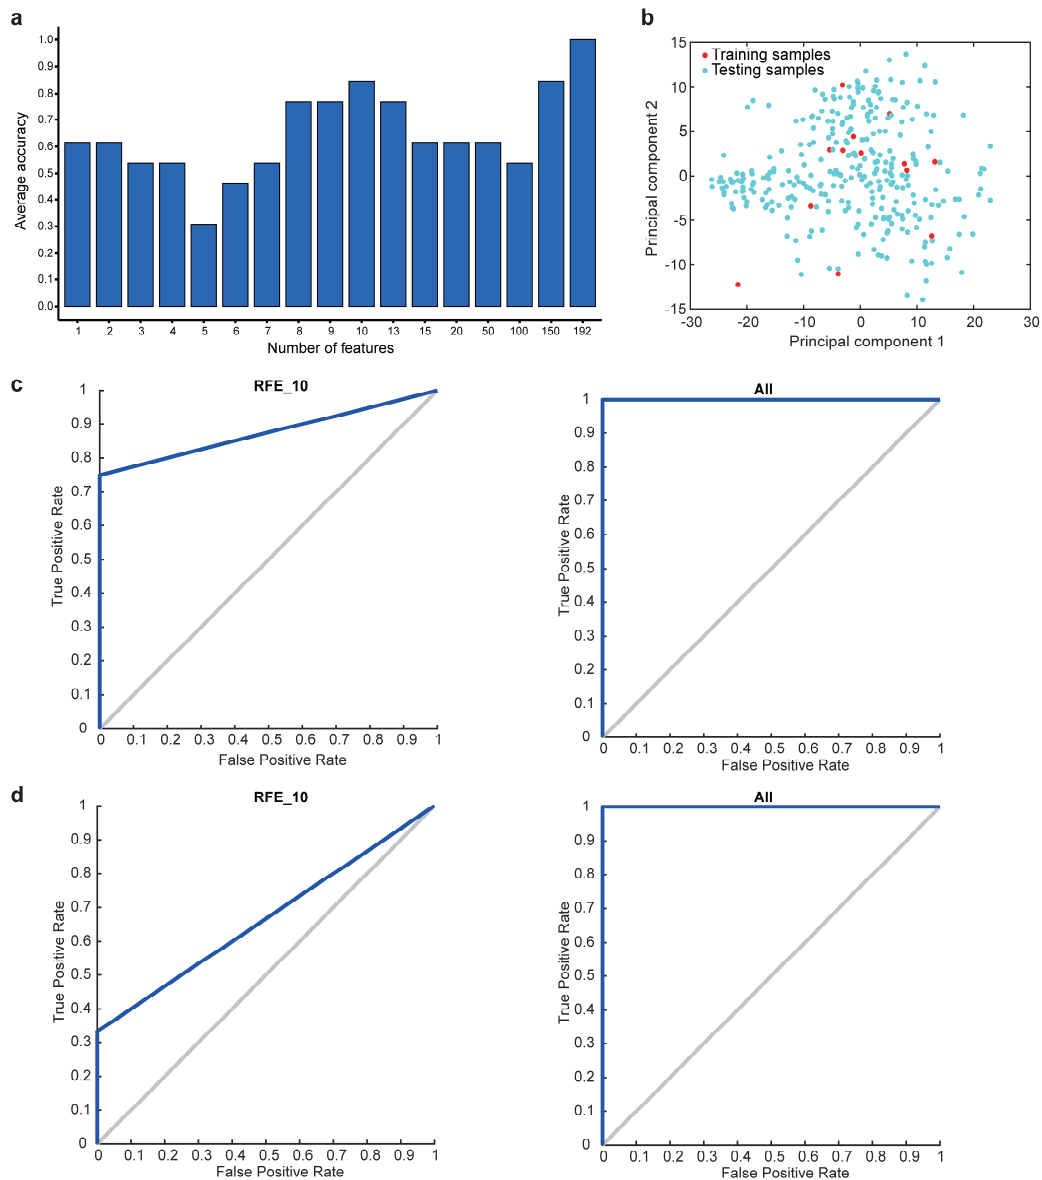

**Supplementary Fig. 9, related to Fig. 6. Construction of the radiomics prediction model.**

(a) Accuracy of different features selection using the recursive feature elimination (REF) algorithm. (b) PCA result from the training and testing samples based on the 192 dimensional features. (c) ROC curve of the training samples using the top ten features selected by the RFE method (left) and whole feature set (right). (d) ROC curve of the classifier on additional validation patients (P49-P53), using the top ten features selected by the RFE method (left), and the whole feature set (right). Source data are provided as a Source Data file.

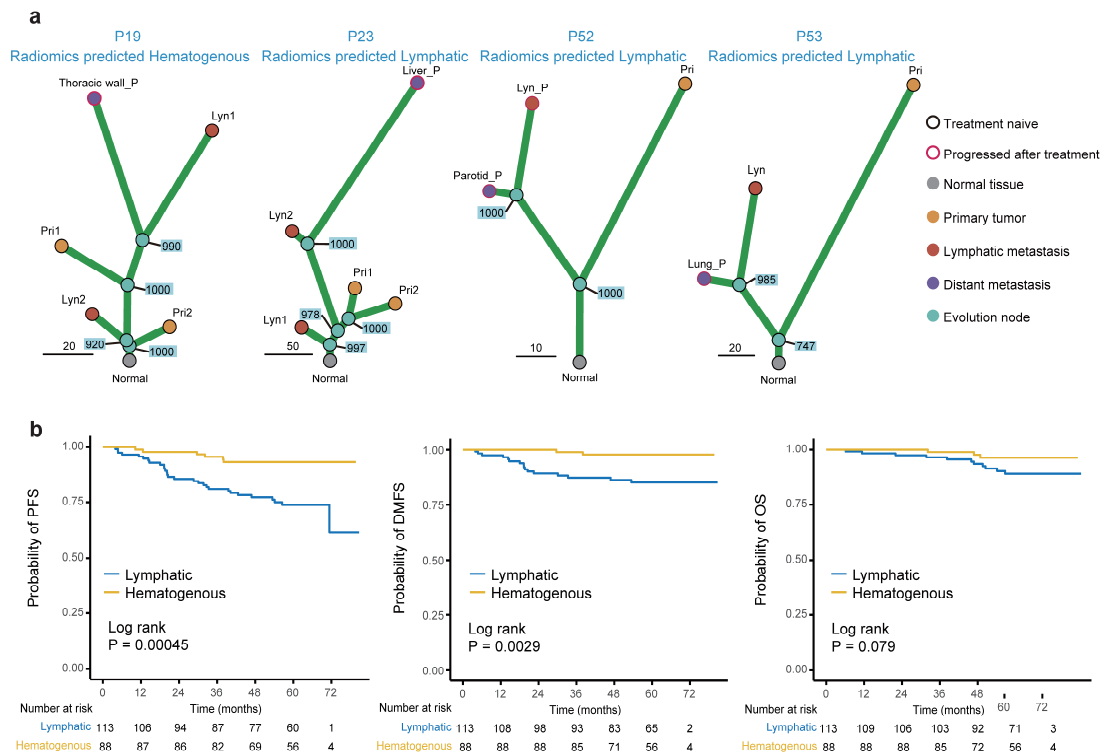

**Supplementary Fig. 10, related to Fig. 6. Validation of the radiomics prediction model.**

(a) Radiomics prediction model results and phylogenetic trees for patients who developed progression during follow-up (P19 and P23) or patients newly collected (P52, P53) to further validate the radiomics prediction model. (b) Kaplan–Meier curves of PFS (left), DMFS (middle) and OS (right) in the M0-stage NPC cohort (n = 201).

**a**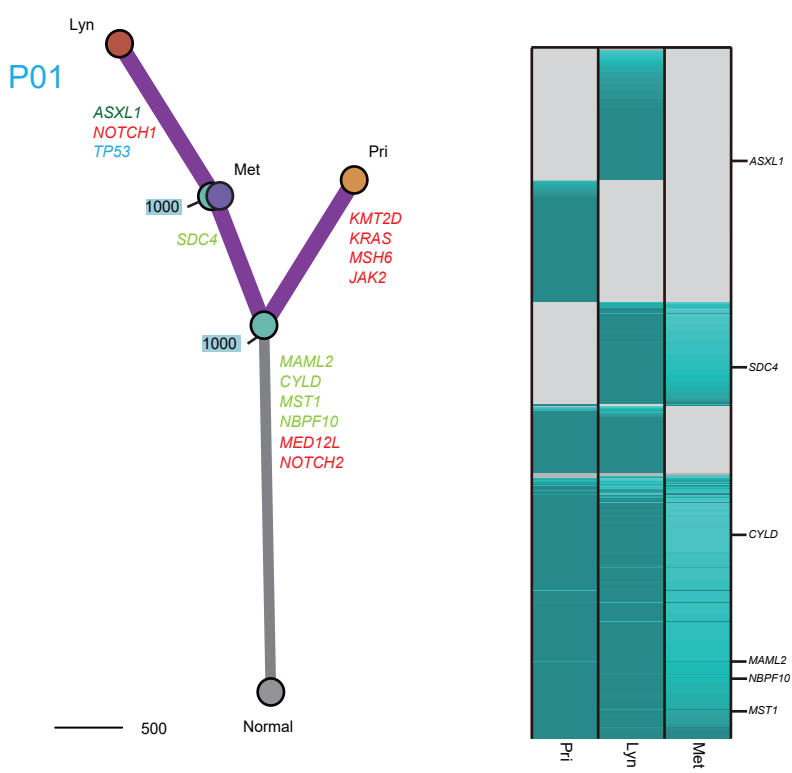

○ Primary tumor

○ Progressed tumor

● Normal tissue

● Primary tumor

● Lymphatic metastasis

● Distant metastasis

● Evolution node

● Signature 1 (Age)

● Signature 2 (APOBEC)

● Signature 13 (APOBEC)

● Signature 4 (Tobacco)

● Signature 5 (Unknown)

● Signature 6 (Mismatch repair)

● NA

Cancer cell fraction

0% 100% Unavailable

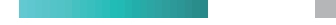

TP53 Clonal mutated gene in all samples of this branch

TP53 Clonal mutated gene in some samples of this branch

TP53 Subclonal mutated gene in all samples of this branch

TP53 Clonality information unavailable in some samples of this branch

TP53 Amplified gene in all samples of this branch

TP53 Deleted gene in all samples of this branch

**b**

P02

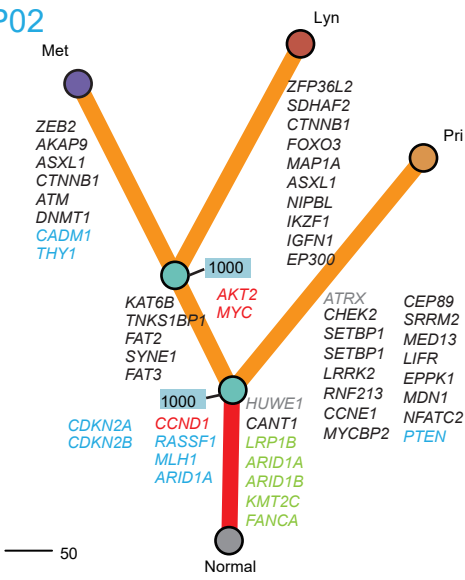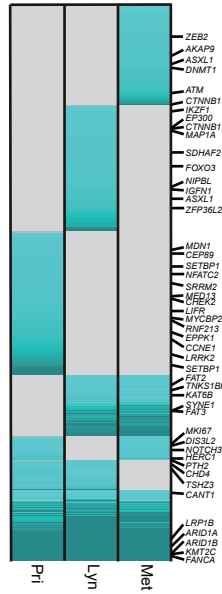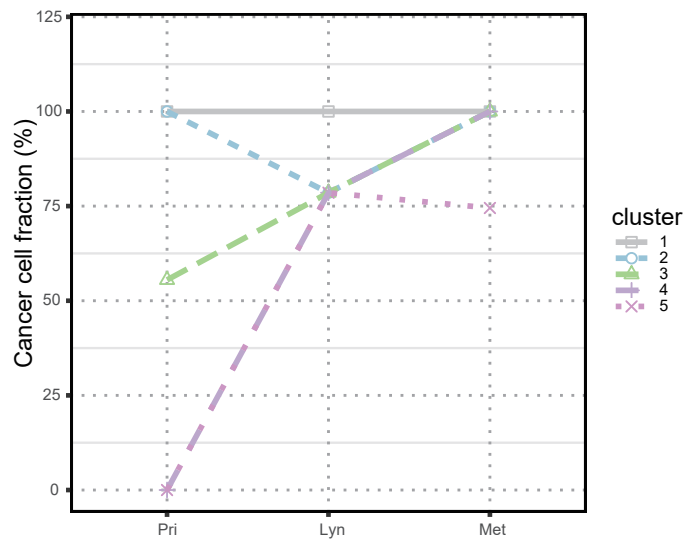

- Primary tumor
- Progressed tumor
- Normal tissue
- Primary tumor
- Lymphatic metastasis
- Distant metastasis
- Evolution node
- Signature 1 (Age)
- Signature 2 (APOBEC)
- Signature 13 (APOBEC)
- Signature 4 (Tobacco)
- Signature 5 (Unknown)
- Signature 6 (Mismatch repair)
- NA

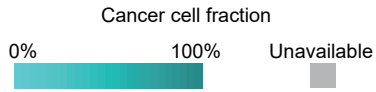

- TP53 Clonal mutated gene in all samples of this branch
- TP53 Clonal mutated gene in some samples of this branch
- TP53 Subclonal mutated gene in all samples of this branch
- TP53 Clonality information unavailable in some samples of this branch
- TP53 Amplificated gene in all samples of this branch
- TP53 Deleted gene in all samples of this branch

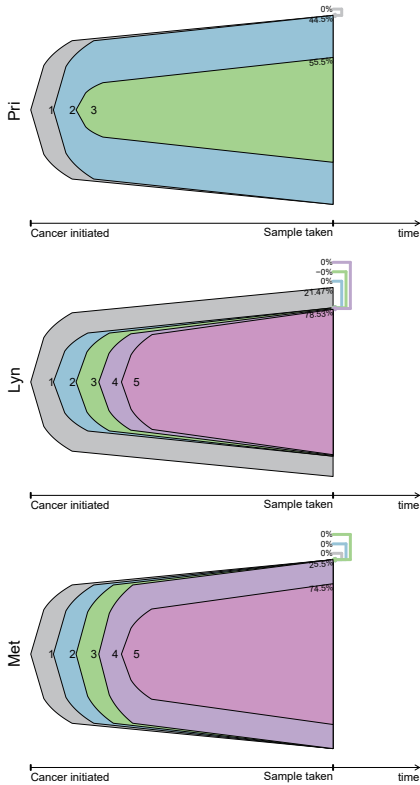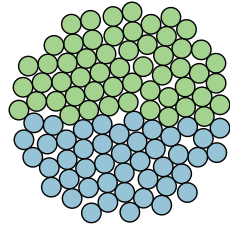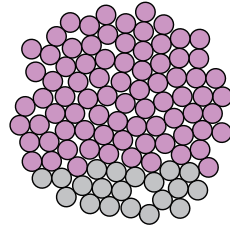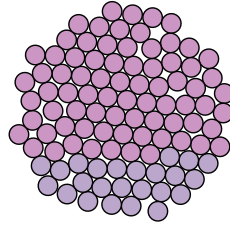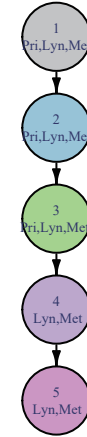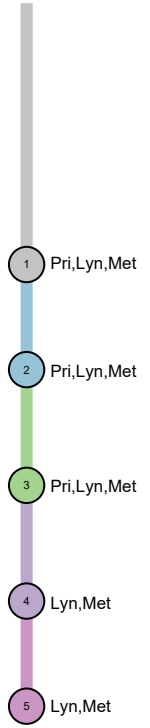

- 1: KMT2C;FANCA;ARID1A;ARID1B;LRP1B
- 2: Amp\_TP53;Del\_ARID1A;Del\_CDKN2A;Del\_MLH1;Del\_RASSF1;Amp\_ATG13;Del\_JAK2;Del\_CDKN2B;
- 3: NULL
- 4: NULL
- 5: NULL

- Unique location
- Multiple location



**C**

**P03**

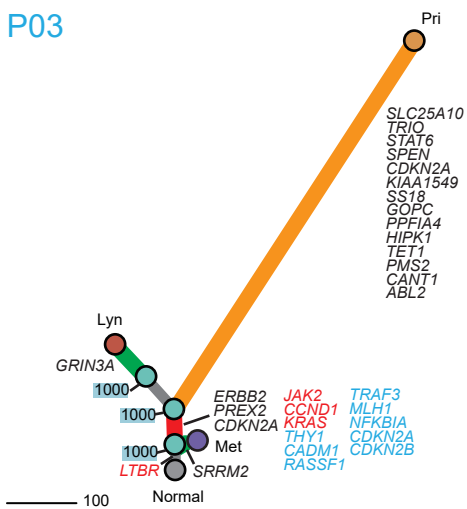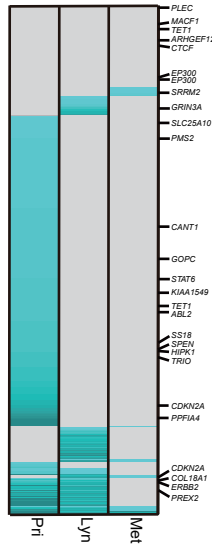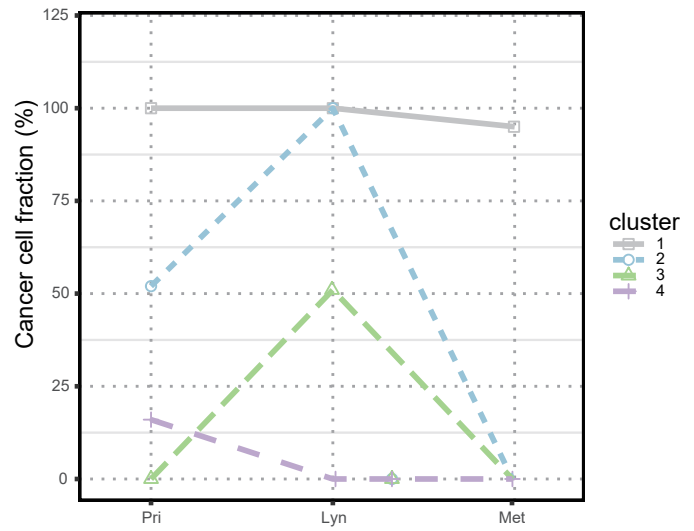

- Primary tumor
- Progressed tumor
- Normal tissue
- Primary tumor
- Lymphatic metastasis
- Distant metastasis
- Evolution node
- Signature 1 (Age)
- Signature 2 (APOBEC)
- Signature 13 (APOBEC)
- Signature 4 (Tobacco)
- Signature 5 (Unknown)
- Signature 6 (Mismatch repair)
- NA

- Cancer cell fraction
- 0% 100% Unavailable
- TP53 Clonal mutated gene in all samples of this branch
  - TP53 Clonal mutated gene in some samples of this branch
  - TP53 Subclonal mutated gene in all samples of this branch
  - TP53 Clonality information unavailable in some samples of this branch
  - TP53 Amplificated gene in all samples of this branch
  - TP53 Deleted gene in all samples of this branch

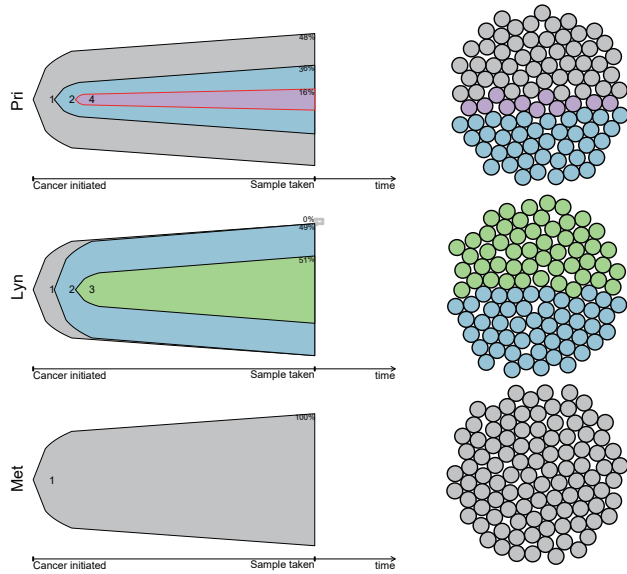

- 1: NULL
- 2: Del\_CDKN2A;Del\_THY1;Del\_MLH1;Del\_NFKBIA;Amp\_KRAS
- 3: NULL
- 4: SRRM2;SPEN;SS18;MACF1;ARHGEF12;CANT1;TRIO;CDKN2A;AHNAK2;TET1

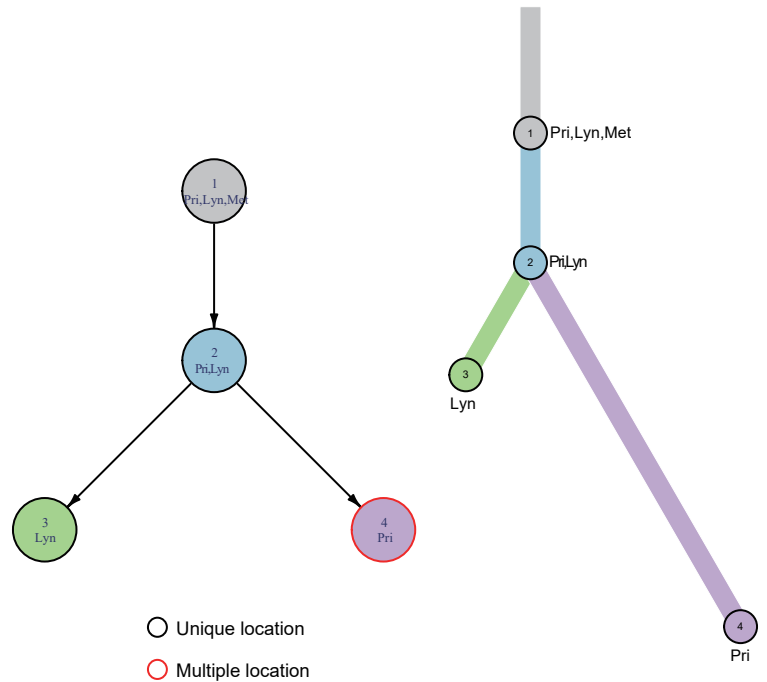

- Unique location
- Multiple location

d

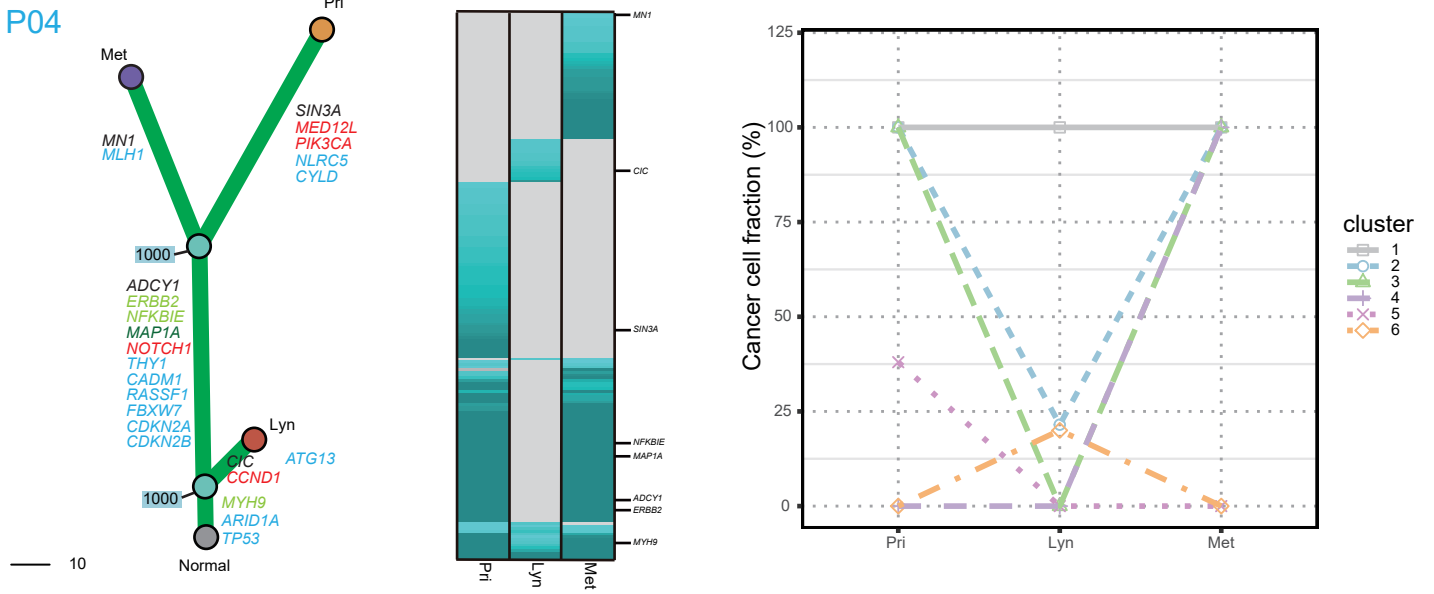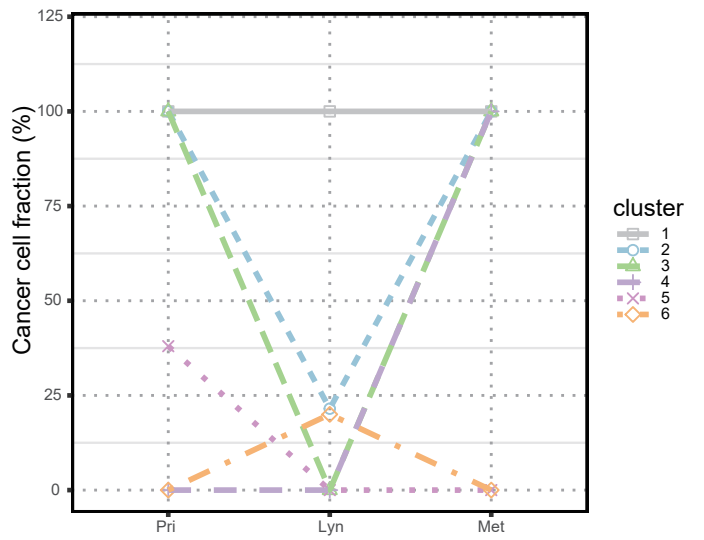

- Primary tumor
- Progressed tumor
- Normal tissue
- Primary tumor
- Lymphatic metastasis
- Distant metastasis
- Evolution node
- Signature 1 (Age)
- Signature 2 (APOBEC)
- Signature 13 (APOBEC)
- Signature 4 (Tobacco)
- Signature 5 (Unknown)
- Signature 6 (Mismatch repair)
- NA

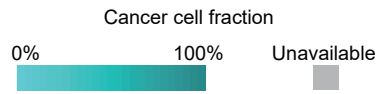

- TP53 Clonal mutated gene in all samples of this branch
- TP53 Clonal mutated gene in some samples of this branch
- TP53 Subclonal mutated gene in all samples of this branch
- TP53 Clonality information unavailable in some samples of this branch
- TP53 Amplificated gene in all samples of this branch
- TP53 Deleted gene in all samples of this branch

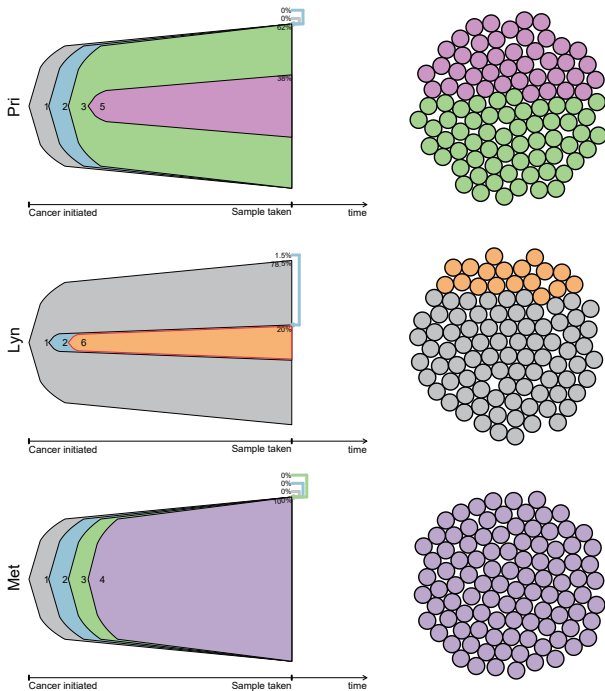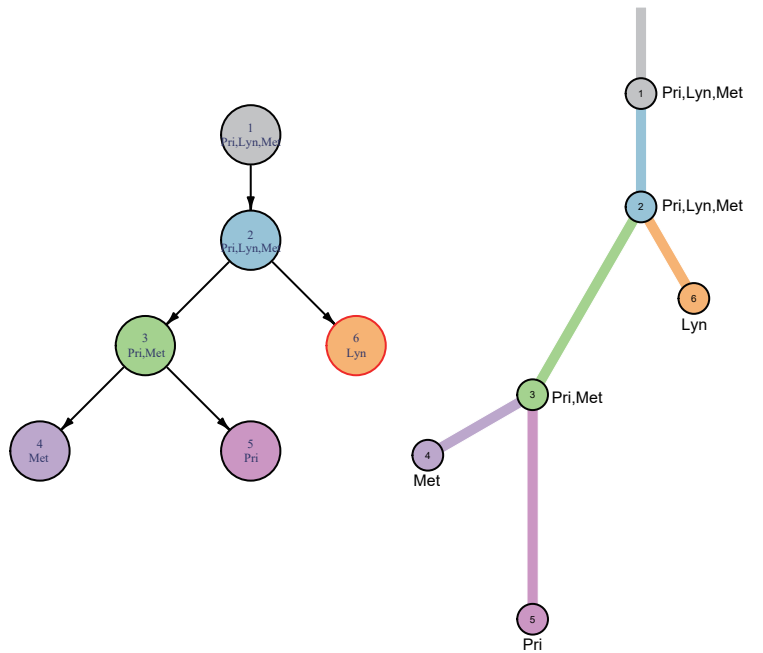

- 1: Del\_ARID1A
- 2: ERBB2;MYH9;NFKBIE
- 3: Del\_THY1;Amp\_NOTCH1;Del\_FBXW7;Del\_CADM1;Del\_CCND1; Del\_RASSF1;MAP1A;ADCY1;
- 4: Del\_MLH1
- 5: NULL
- 6: NULL

- Unique location
- Multiple location

e

P05

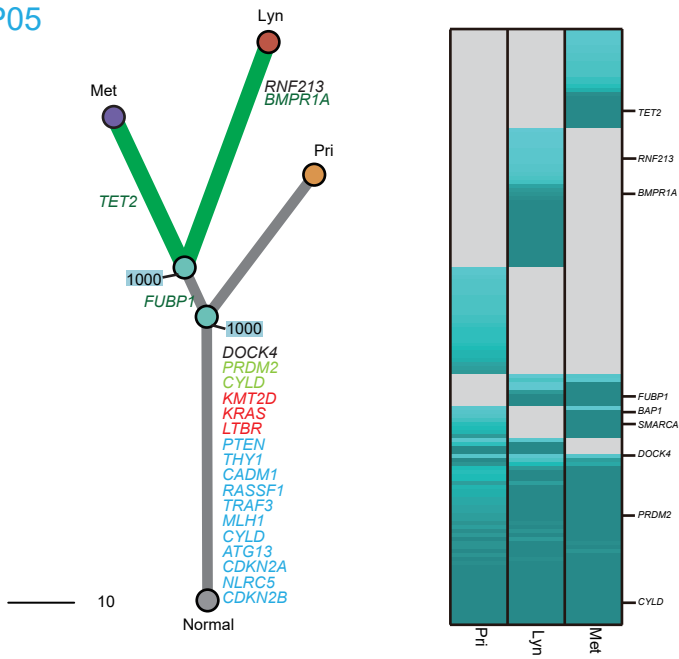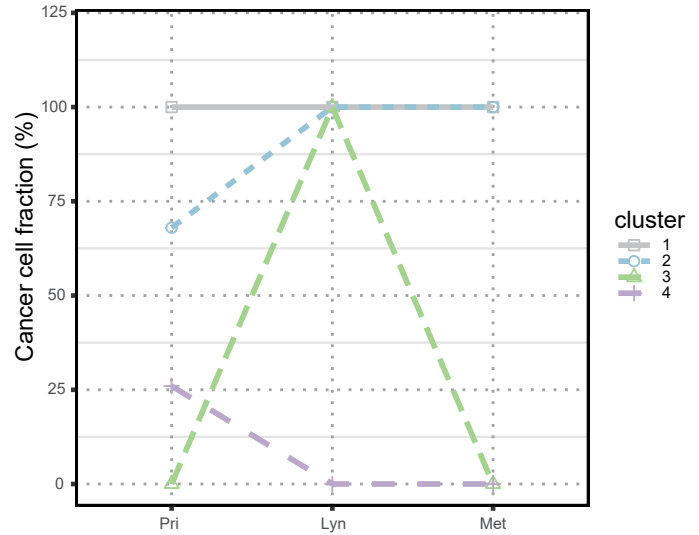

- Primary tumor
- Progressed tumor
- Normal tissue
- Primary tumor
- Lymphatic metastasis
- Distant metastasis
- Evolution node
- Signature 1 (Age)
- Signature 2 (APOBEC)
- Signature 13 (APOBEC)
- Signature 4 (Tobacco)
- Signature 5 (Unknown)
- Signature 6 (Mismatch repair)
- NA

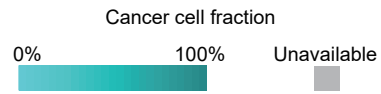

- TP53 Clonal mutated gene in all samples of this branch
- TP53 Clonal mutated gene in some samples of this branch
- TP53 Subclonal mutated gene in all samples of this branch
- TP53 Clonality information unavailable in some samples of this branch
- TP53 Amplificated gene in all samples of this branch
- TP53 Deleted gene in all samples of this branch

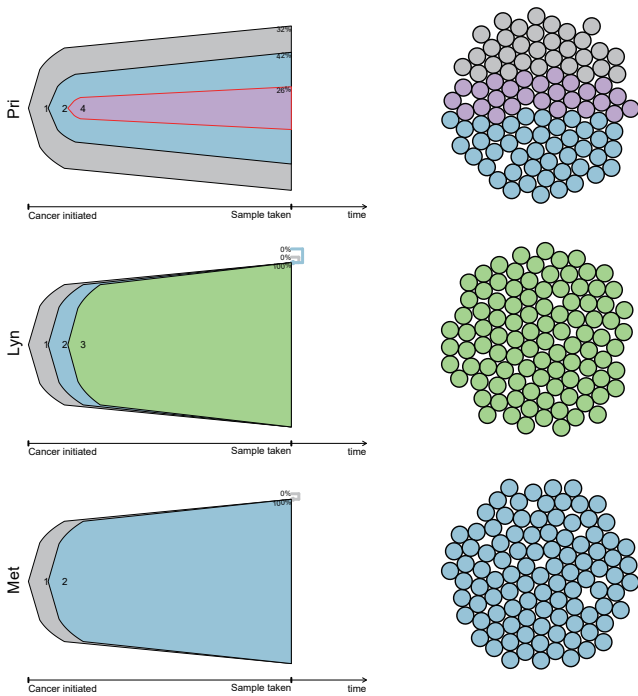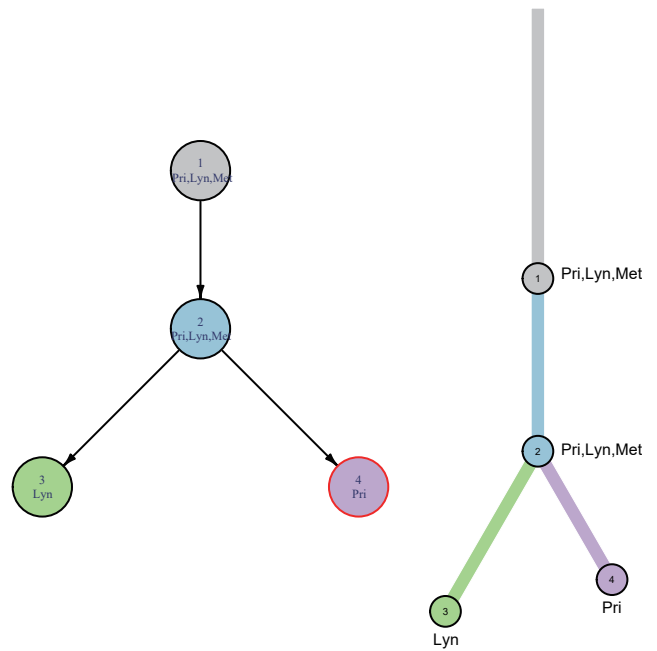

- 1: Del\_CDKN2A;Del\_NLRC5;Amp\_LTBR;Amp\_KRAS;Del\_CADM1  
Del\_CYLD;Del\_CDKN2B;Del\_PTEN;CYLD;Amp\_KMT2D  
Del\_THY1;Del\_MLH1;Del\_RASSF1;Del\_TRAF3;Del\_JAK2  
Del\_ATG13;
- 2: PRDM2
- 3: Del\_NOTCH1
- 4: NULL

- Unique location
- Multiple location

f

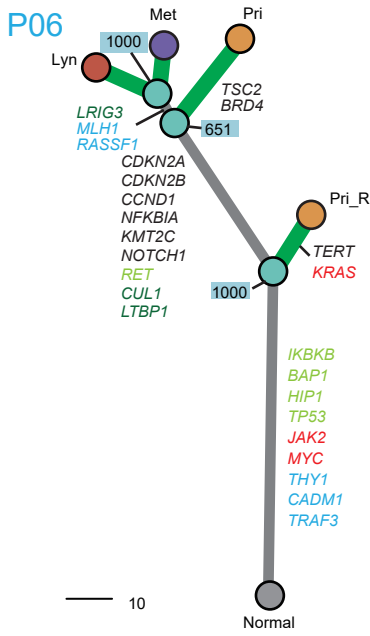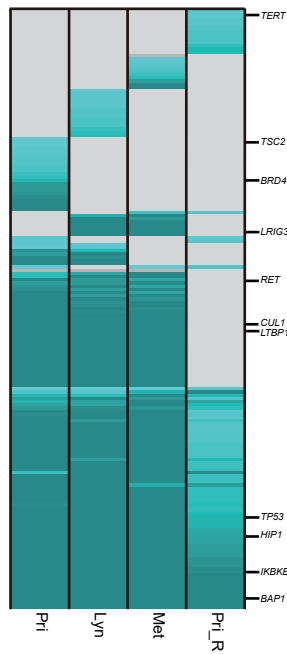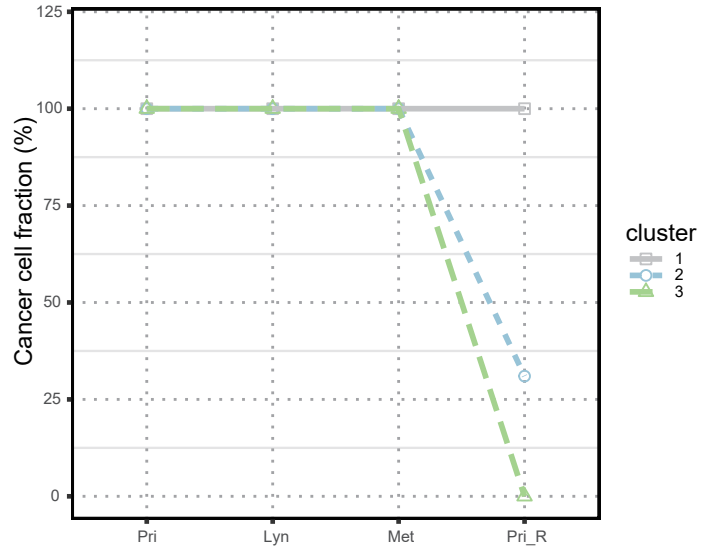

- Primary tumor
- Progressed tumor
- Normal tissue
- Primary tumor
- Lymphatic metastasis
- Distant metastasis
- Evolution node

- Signature 1 (Age)
- Signature 2 (APOBEC)
- Signature 13 (APOBEC)
- Signature 4 (Tobacco)
- Signature 5 (Unknown)
- Signature 6 (Mismatch repair)
- NA

- Cancer cell fraction
- 0% 100% Unavailable
- TP53 Clonal mutated gene in all samples of this branch
  - TP53 Clonal mutated gene in some samples of this branch
  - TP53 Subclonal mutated gene in all samples of this branch
  - TP53 Clonality information unavailable in some samples of this branch
  - TP53 Amplificated gene in all samples of this branch
  - TP53 Deleted gene in all samples of this branch

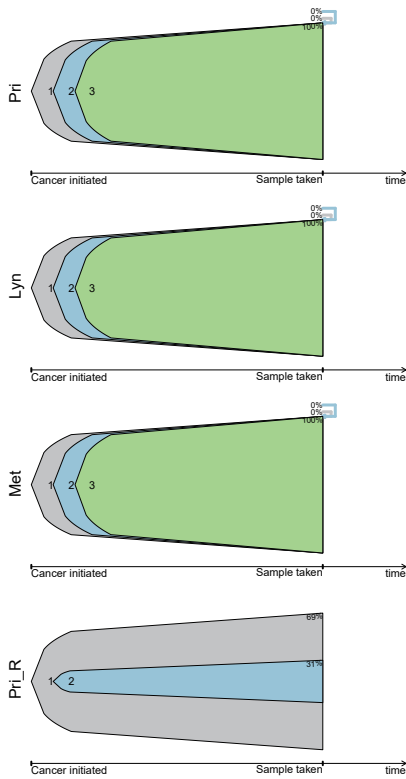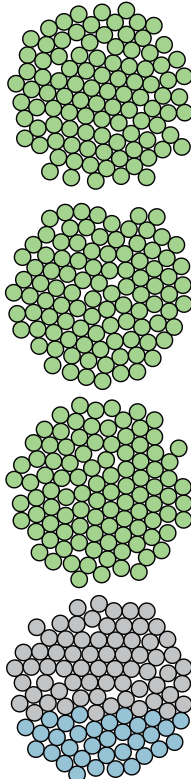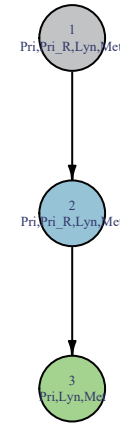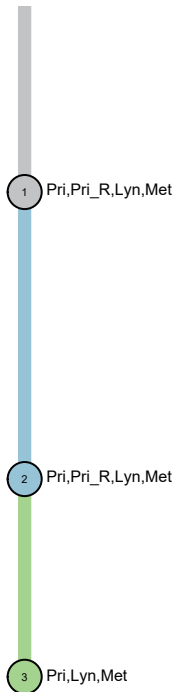

- 1: IKBKB;Del\_AKT2;Amp\_MYC;Del\_TRAF3;BAP1
- 2: LTBP1
- 3: Del\_NFKBIA;Amp\_CCND1;Del\_NOTCH1;CUL1;Del\_KMT2C;Amp\_CDKN2A;Amp\_CDKN2B;

- Unique location
- Multiple location

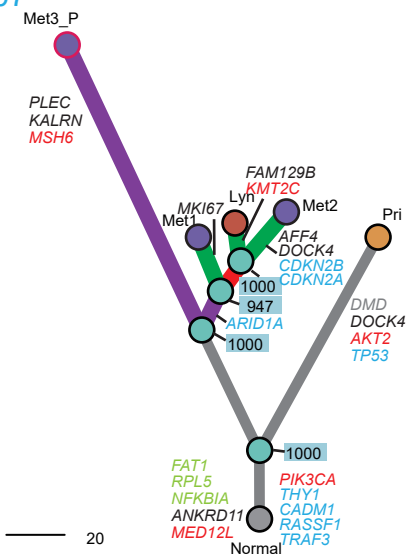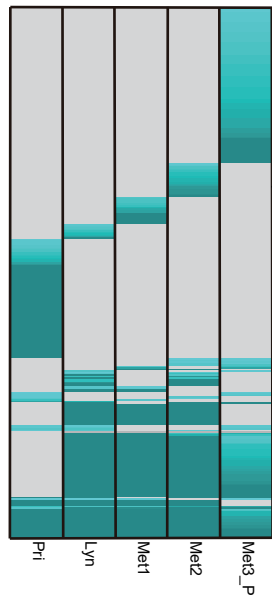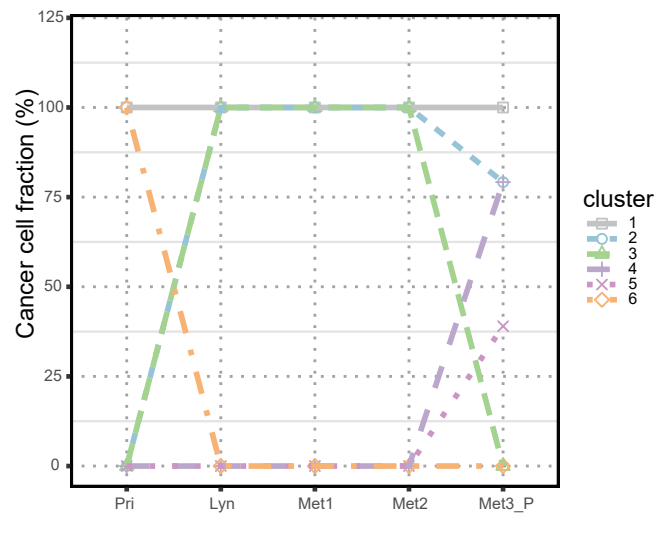

- Primary tumor
- Progressed tumor
- Normal tissue
- Primary tumor
- Lymphatic metastasis
- Distant metastasis
- Evolution node
- Signature 1 (Age)
- Signature 2 (APOBEC)
- Signature 13 (APOBEC)
- Signature 4 (Tobacco)
- Signature 5 (Unknown)
- Signature 6 (Mismatch repair)
- NA

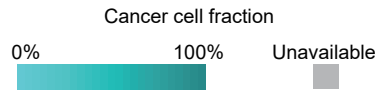

- TP53 Clonal mutated gene in all samples of this branch
- TP53 Clonal mutated gene in some samples of this branch
- TP53 Subclonal mutated gene in all samples of this branch
- TP53 Clonality information unavailable in some samples of this branch
- TP53 Amplified gene in all samples of this branch
- TP53 Deleted gene in all samples of this branch

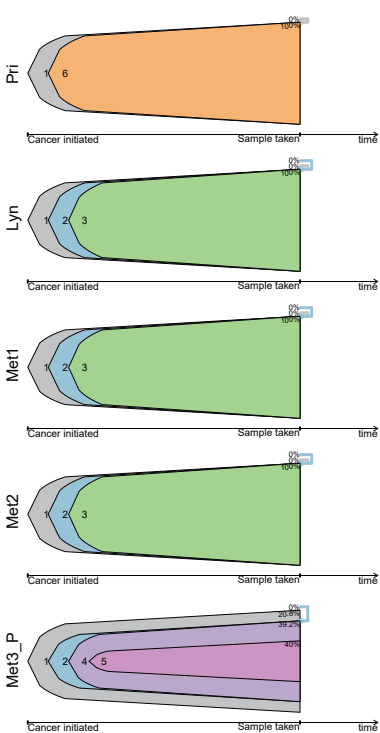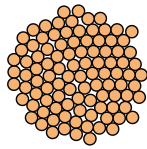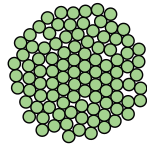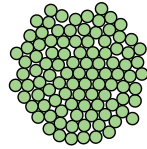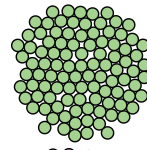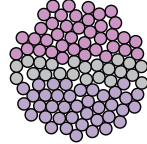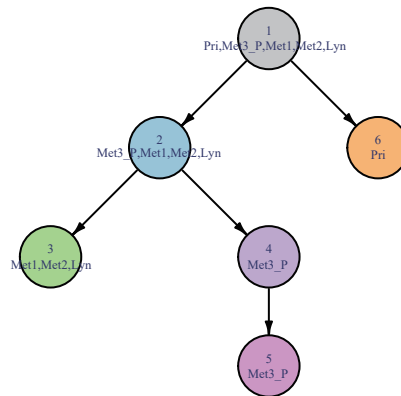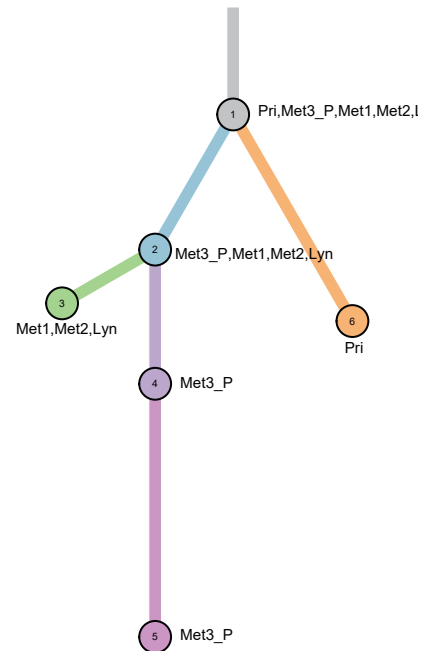

- 1: Del\_THY1;Del\_CADM1;Amp\_MED12L;Del\_RASSF1;Del\_TRAF3;Amp\_PIK3CA;
- 2: NFKB1A;ANKRD11
- 3: Del\_ARID1A
- 4: Del\_AKT2;Del\_NOTCH1;Amp\_CDKN2A;Amp\_CDKN2B;Amp\_MSH6
- 5: KALRN;PLEC
- 6: Amp\_AKT2;Del\_JAK2;Del\_TP53

- Unique location
- Multiple location

h

P08

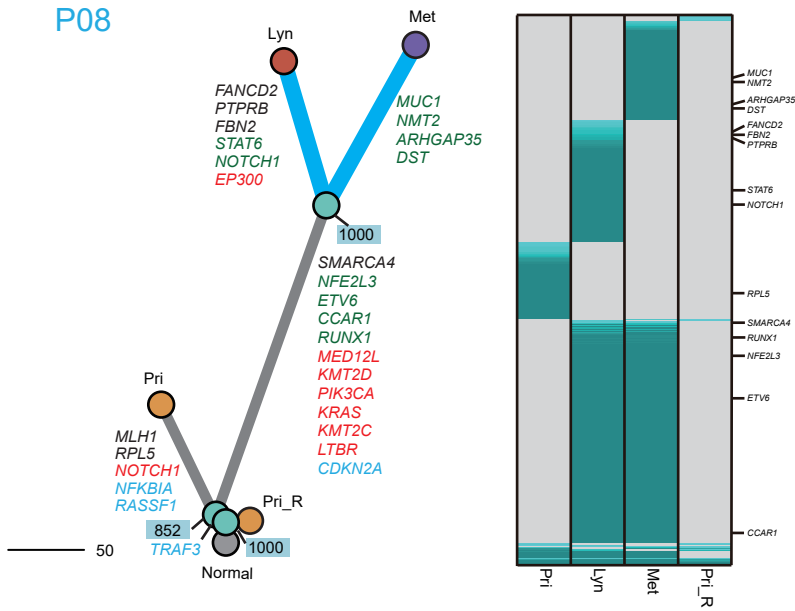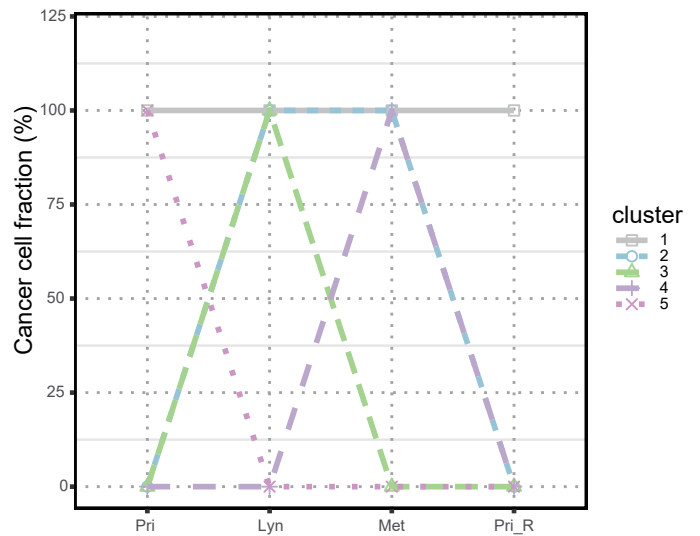

- Primary tumor
- Progressed tumor
- Normal tissue
- Primary tumor
- Lymphatic metastasis
- Distant metastasis
- Evolution node
- Signature 1 (Age)
- Signature 2 (APOBEC)
- Signature 13 (APOBEC)
- Signature 4 (Tobacco)
- Signature 5 (Unknown)
- Signature 6 (Mismatch repair)
- NA

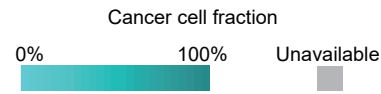

- TP53 Clonal mutated gene in all samples of this branch
- TP53 Clonal mutated gene in some samples of this branch
- TP53 Subclonal mutated gene in all samples of this branch
- TP53 Clonality information unavailable in some samples of this branch
- TP53 Amplificated gene in all samples of this branch
- TP53 Deleted gene in all samples of this branch

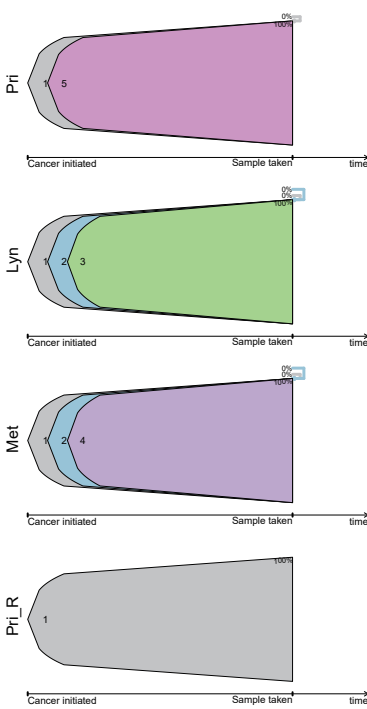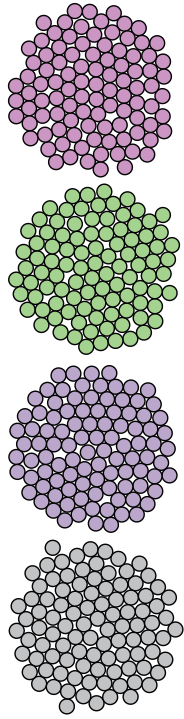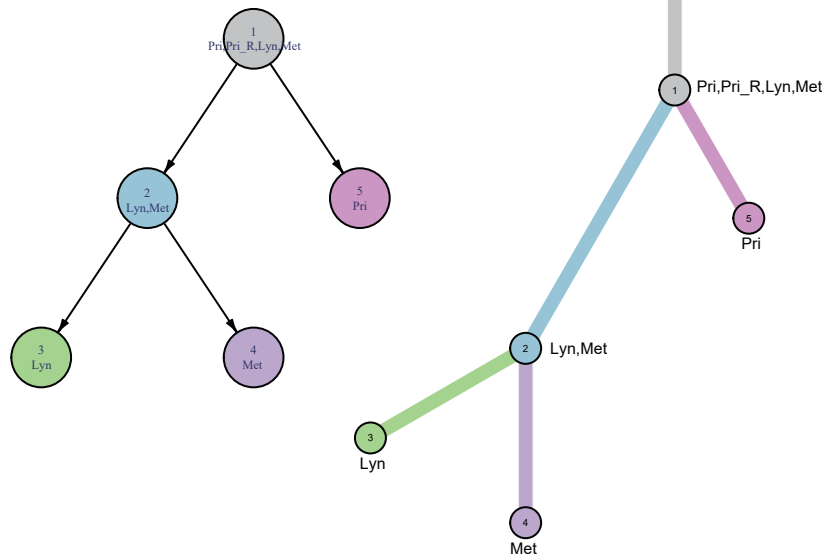

- 1: NULL
- 2: Del\_CDKN2A;Amp\_KMT2D;Amp\_KMT2C;Amp\_LTBR;Amp\_KRAS;Amp\_MED12L;NFE2L3;Amp\_PTEN;Amp\_PIK3CA;CCAR1;ETV6;RUNX1;
- 3: NOTCH1;Amp\_EP300;STAT6;Del\_JAK2
- 4: MUC1;DST;NMT2;ARHGAP35
- 5: RPL5;Amp\_NOTCH1;Del\_MLH1;Del\_NFKB1A;Del\_RASSF1

- Unique location
- Multiple location

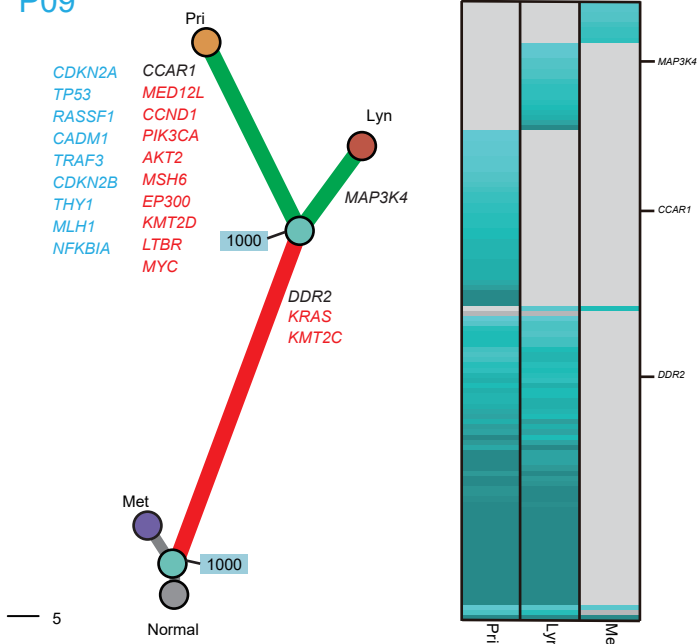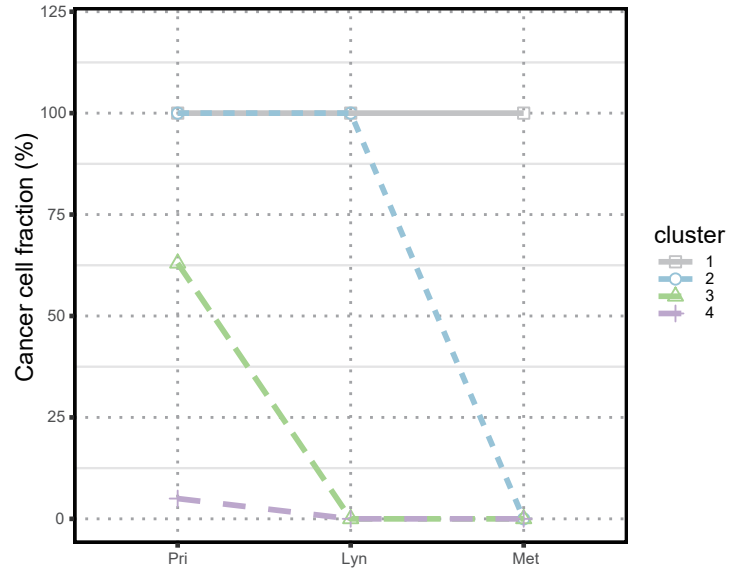

- Primary tumor
- Progressed tumor
- Normal tissue
- Primary tumor
- Lymphatic metastasis
- Distant metastasis
- Evolution node
- Signature 1 (Age)
- Signature 2 (APOBEC)
- Signature 13 (APOBEC)
- Signature 4 (Tobacco)
- Signature 5 (Unknown)
- Signature 6 (Mismatch repair)
- NA

- Cancer cell fraction
- 0% 100% Unavailable
- TP53 Clonal mutated gene in all samples of this branch
  - TP53 Clonal mutated gene in some samples of this branch
  - TP53 Subclonal mutated gene in all samples of this branch
  - TP53 Clonality information unavailable in some samples of this branch
  - TP53 Amplificated gene in all samples of this branch
  - TP53 Deleted gene in all samples of this branch

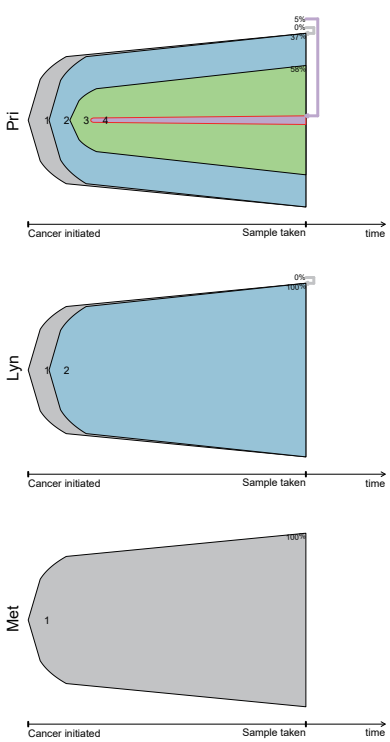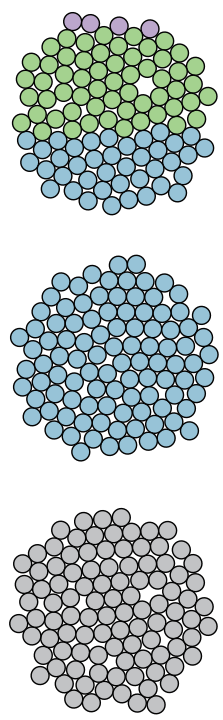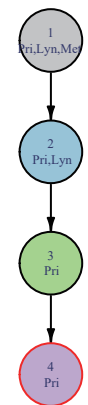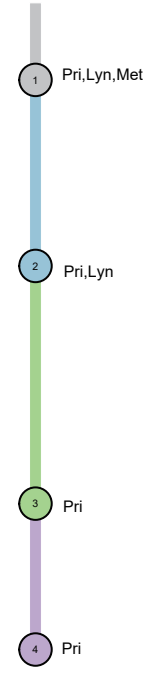

- 1: NULL
- 2: NULL
- 3: Del\_CDKN2A;Amp\_LTBR;Amp\_EP300;Amp\_CCND1;Del\_CADM1  
Del\_MLH1;Del\_NFKBIA;Amp\_MED12L;Amp\_MYC;Del\_RASSF1  
Del\_TRAF3;Del\_TP53;Amp\_PIK3CA;Amp\_MSH6;
- 4: NULL

- Unique location
- Multiple location

j

P10

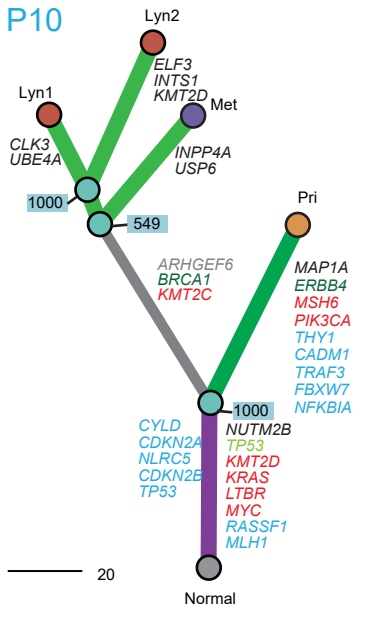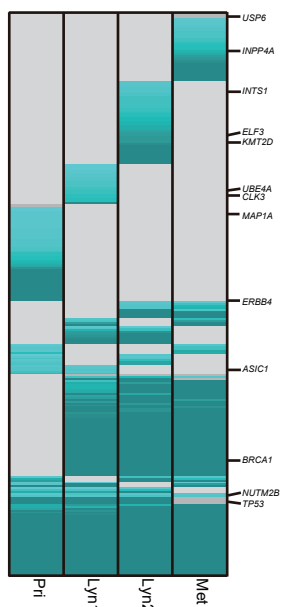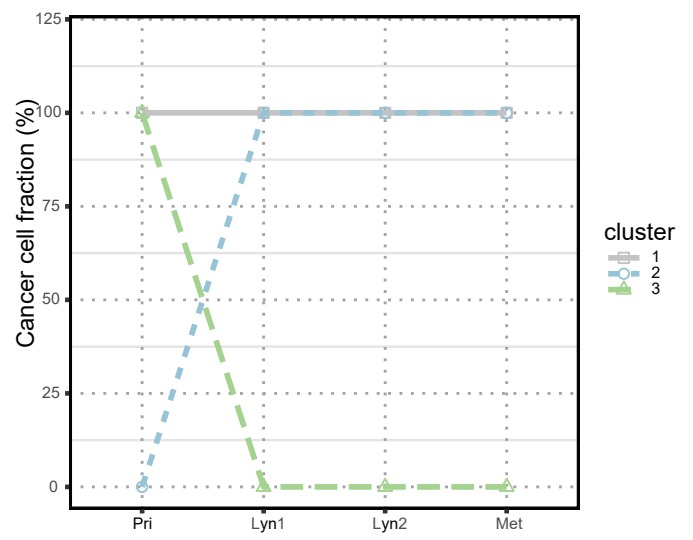

- Primary tumor
- Progressed tumor
- Normal tissue
- Primary tumor
- Lymphatic metastasis
- Distant metastasis
- Evolution node
- Signature 1 (Age)
- Signature 2 (APOBEC)
- Signature 13 (APOBEC)
- Signature 4 (Tobacco)
- Signature 5 (Unknown)
- Signature 6 (Mismatch repair)
- NA

- Cancer cell fraction
- 0% 100% Unavailable
- TP53 Clonal mutated gene in all samples of this branch
  - TP53 Clonal mutated gene in some samples of this branch
  - TP53 Subclonal mutated gene in all samples of this branch
  - TP53 Clonality information unavailable in some samples of this branch
  - TP53 Amplificated gene in all samples of this branch
  - TP53 Deleted gene in all samples of this branch

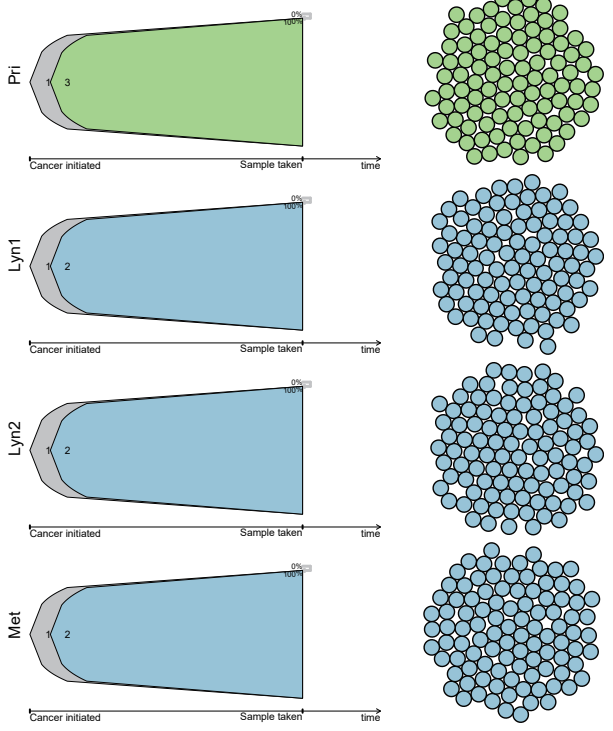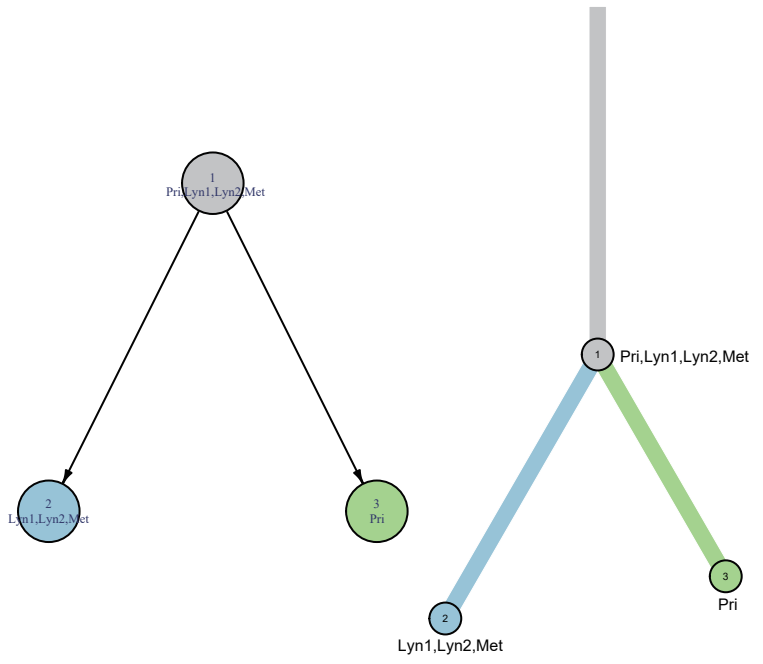

- 1: Amp\_KRAS;Del\_RASSF1;Del\_CYLD;Del\_JAK2;Del\_TP53;Del\_CDKN2B;
- 2: Amp\_KMT2C;BRCA1
- 3: Del\_THY1;Del\_FBXW7;Del\_NFKBIA;ERBB4;Del\_CADM1;Del\_NOTCH1;Amp\_MYC;Del\_TRAF3;Amp\_PIK3CA;Amp\_MSH6

- Unique location
- Multiple location



**k**

**P11**

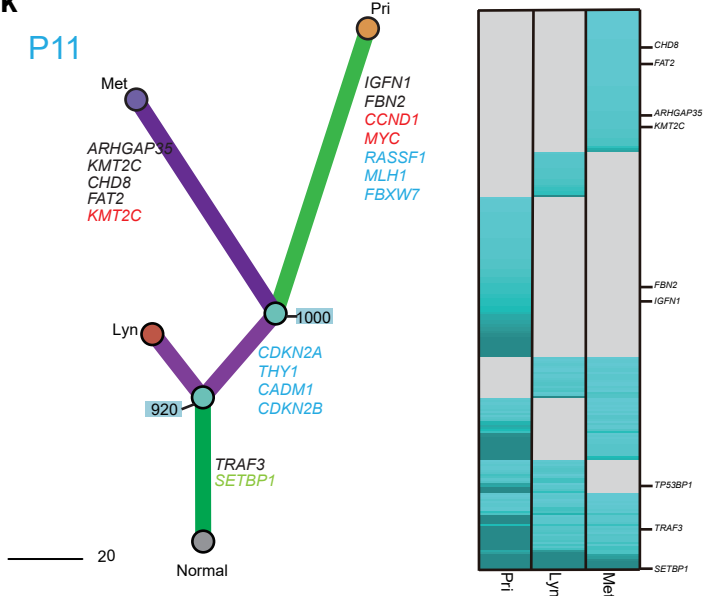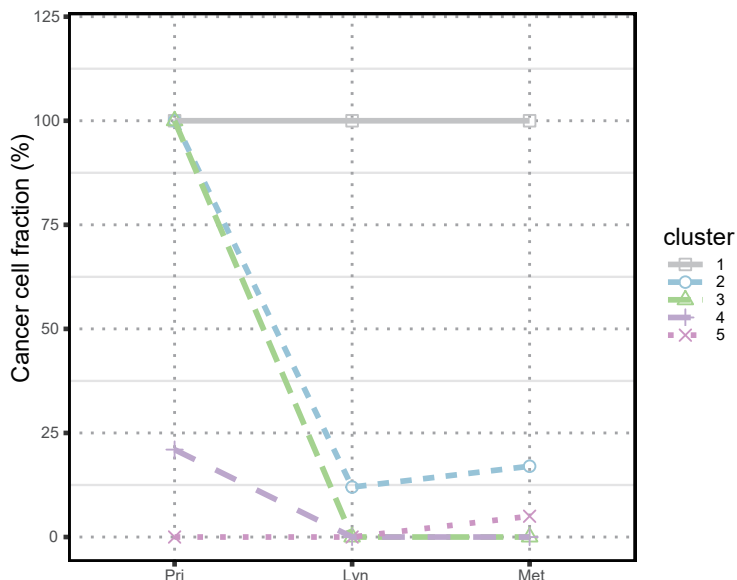

- Primary tumor
- Progressed tumor
- Normal tissue
- Primary tumor
- Lymphatic metastasis
- Distant metastasis
- Evolution node
- Signature 1 (Age)
- Signature 2 (APOBEC)
- Signature 13 (APOBEC)
- Signature 4 (Tobacco)
- Signature 5 (Unknown)
- Signature 6 (Mismatch repair)
- NA

Cancer cell fraction

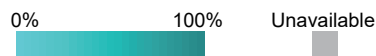

- TP53 Clonal mutated gene in all samples of this branch
- TP53 Clonal mutated gene in some samples of this branch
- TP53 Subclonal mutated gene in all samples of this branch
- TP53 Clonality information unavailable in some samples of this branch
- TP53 Amplificated gene in all samples of this branch
- TP53 Deleted gene in all samples of this branch

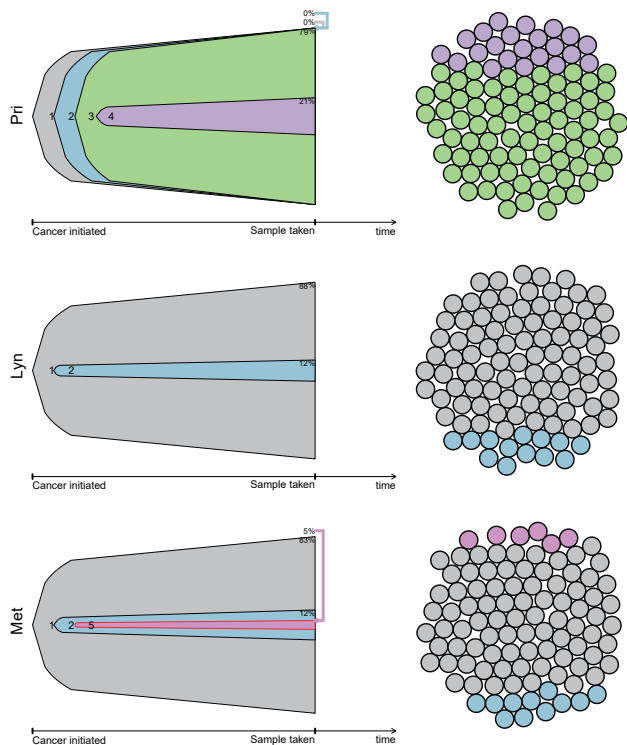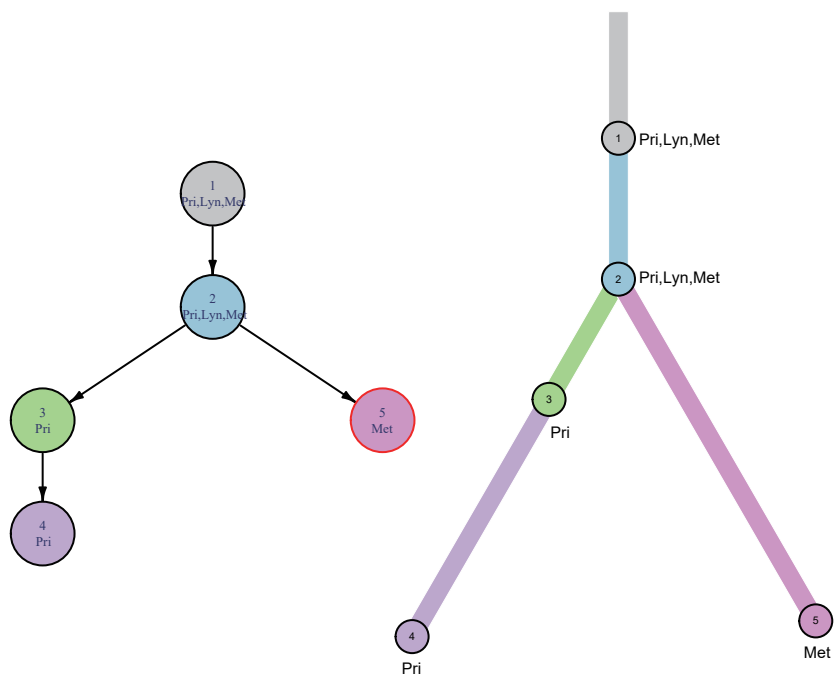

- 1: SETBP1
- 2: TRAF3
- 3: NULL
- 4: FBN2;Del\_FBXW7;Del\_MLH1;Amp\_CCND1;Del\_NOTCH1  
Amp\_MYC;Del\_RASSF1;Amp\_ARID1A;Amp\_ATG13;IGFN1
- 5: CHD8;KMT2C;FAT2;ARHGAP35

- Unique location
- Multiple location

# P12

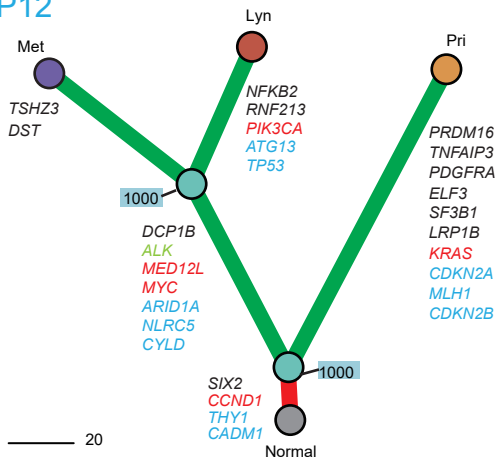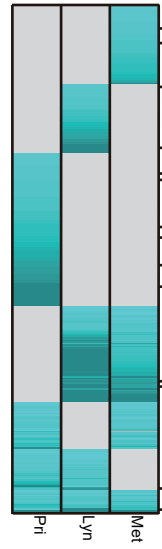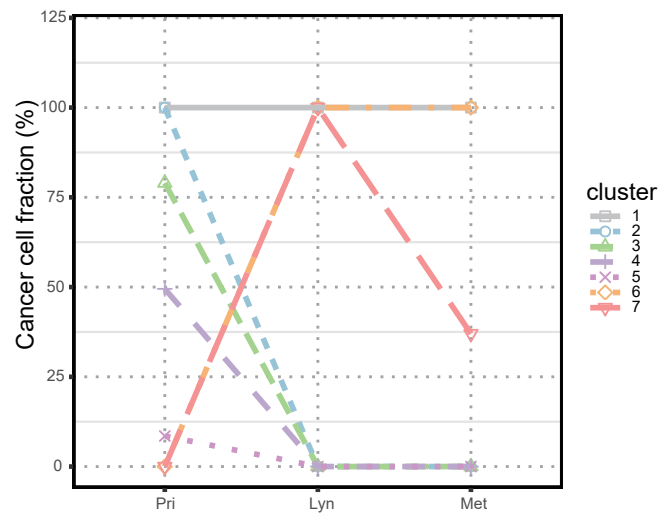

- Primary tumor
- Progressed tumor
- Normal tissue
- Primary tumor
- Lymphatic metastasis
- Distant metastasis
- Evolution node
- Signature 1 (Age)
- Signature 2 (APOBEC)
- Signature 13 (APOBEC)
- Signature 4 (Tobacco)
- Signature 5 (Unknown)
- Signature 6 (Mismatch repair)
- NA

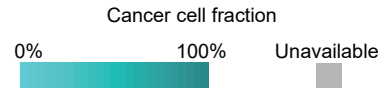

- TP53 Clonal mutated gene in all samples of this branch
- TP53 Clonal mutated gene in some samples of this branch
- TP53 Subclonal mutated gene in all samples of this branch
- TP53 Clonality information unavailable in some samples of this branch
- TP53 Amplified gene in all samples of this branch
- TP53 Deleted gene in all samples of this branch

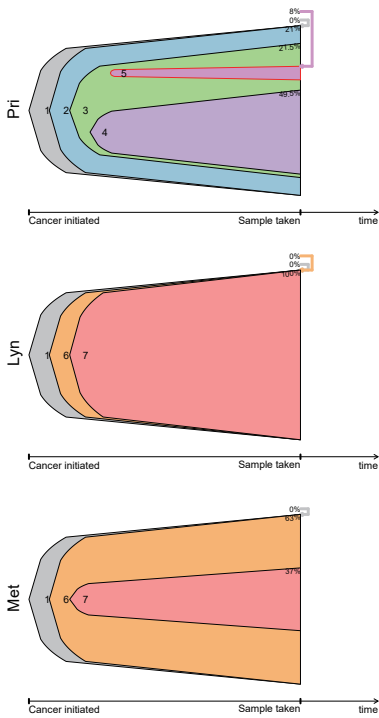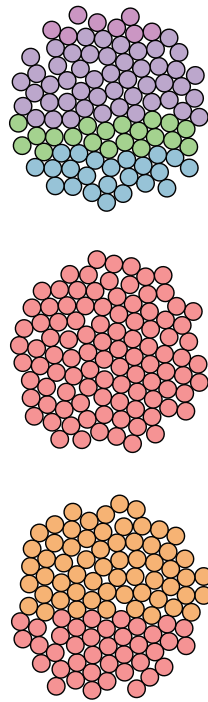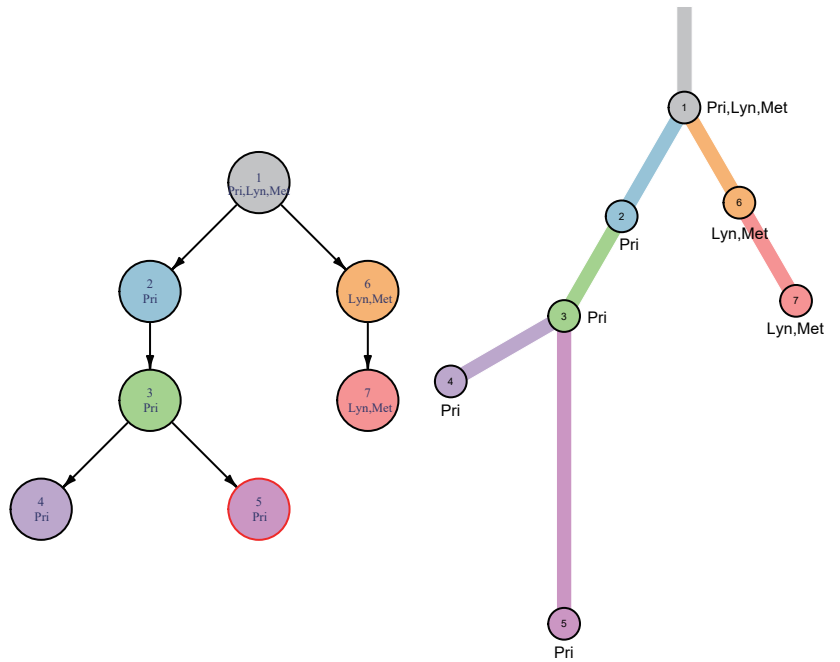

- 1: Del\_THY1;Del\_CADM1
- 2: Del\_CDKN2A;Del\_MLH1;Amp\_KRAS;PRDM16;Del\_CDKN2B
- 3: TNFAIP3
- 4: ELF3;SF3B1
- 5: PDGFRA;RNF213;TSHZ3;DST;AHNAK2;LRP1B;
- 6: Del\_ARID1A;Del\_NLRC5;Amp\_MED12L;Amp\_MYC;Del\_CYLD
- 7: NULL

- Unique location
- Multiple location

m

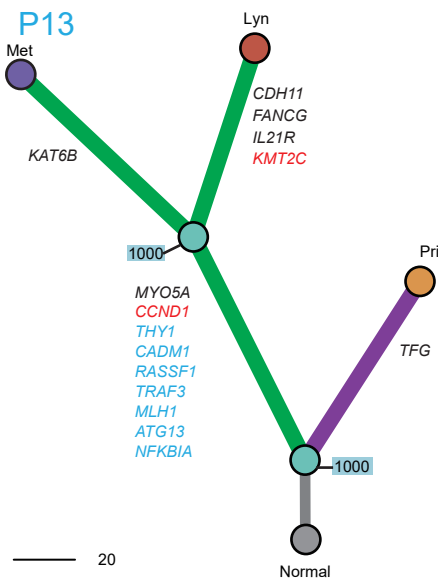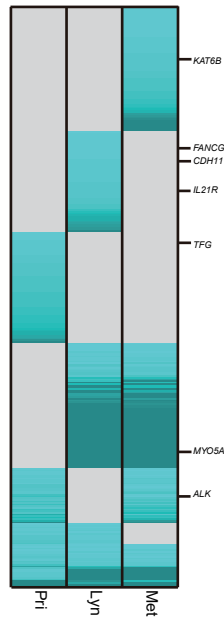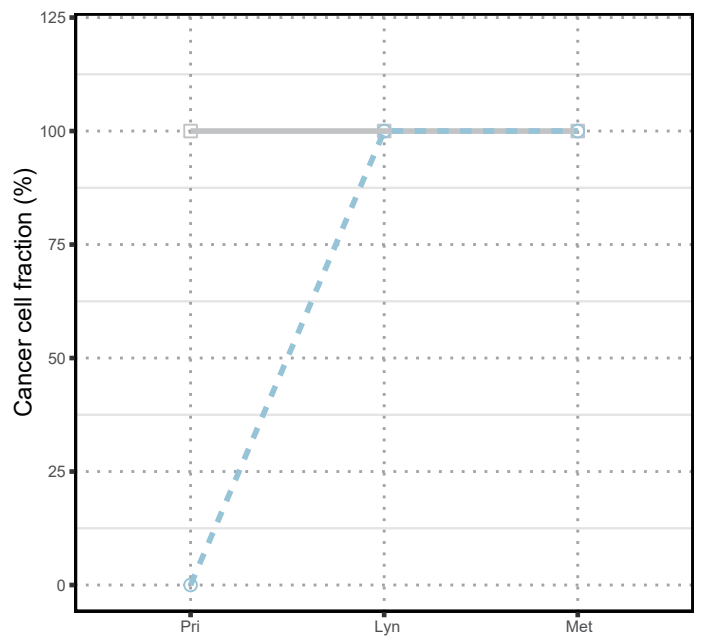

cluster  
 1  
 2

- Primary tumor
- Progressed tumor
- Normal tissue
- Primary tumor
- Lymphatic metastasis
- Distant metastasis
- Evolution node
- Signature 1 (Age)
- Signature 2 (APOBEC)
- Signature 13 (APOBEC)
- Signature 4 (Tobacco)
- Signature 5 (Unknown)
- Signature 6 (Mismatch repair)
- NA

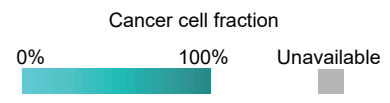

- TP53 Clonal mutated gene in all samples of this branch
- TP53 Clonal mutated gene in some samples of this branch
- TP53 Subclonal mutated gene in all samples of this branch
- TP53 Clonality information unavailable in some samples of this branch
- TP53 Amplified gene in all samples of this branch
- TP53 Deleted gene in all samples of this branch

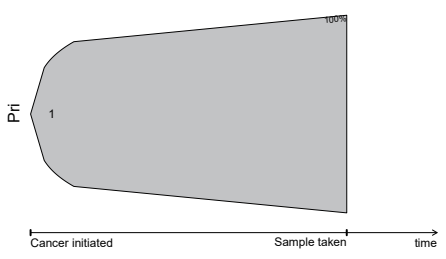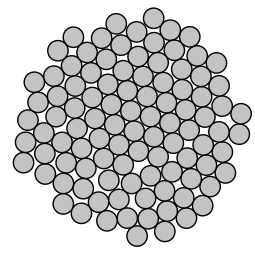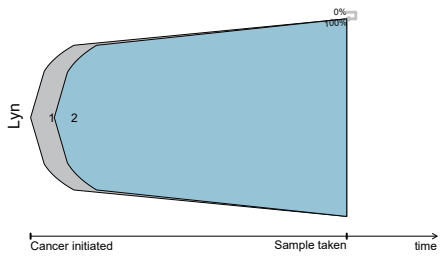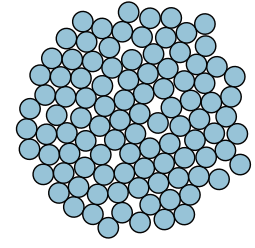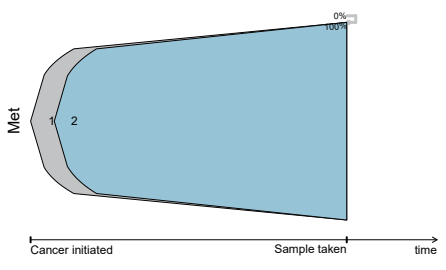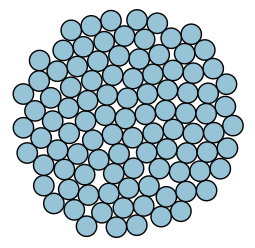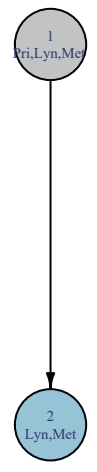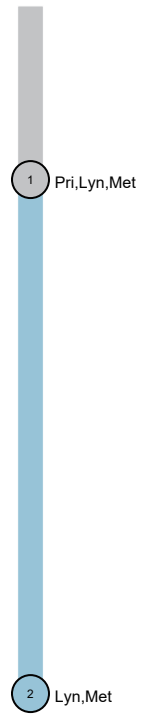

- 1: NULL
- 2: MYO5A

- Unique location
- Multiple location

P14

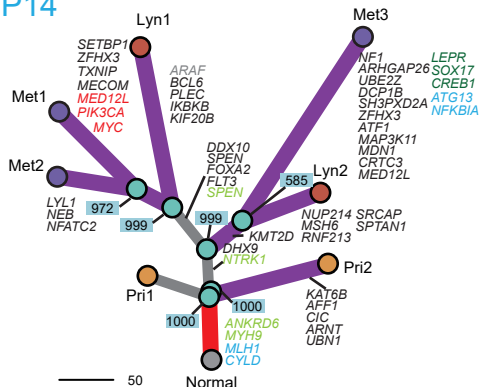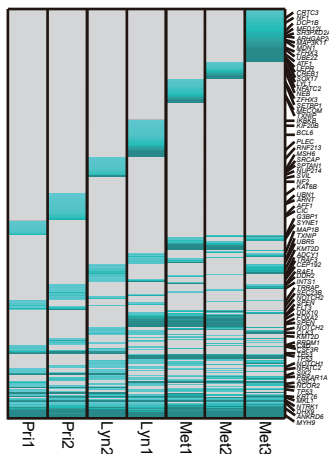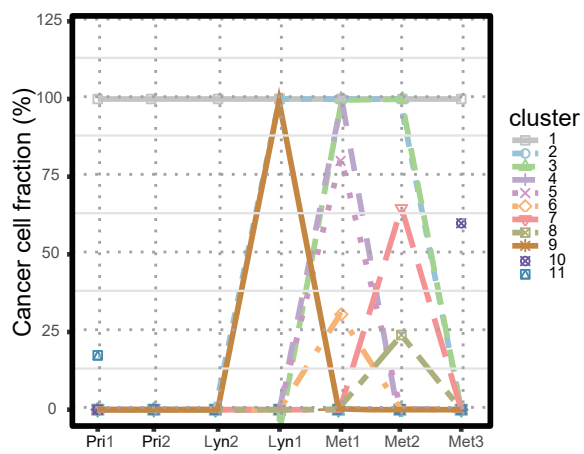

- Primary tumor
- Progressed tumor
- Normal tissue
- Primary tumor
- Lymphatic metastasis
- Distant metastasis
- Evolution node
- Signature 1 (Age)
- Signature 2 (APOBEC)
- Signature 13 (APOBEC)
- Signature 4 (Tobacco)
- Signature 5 (Unknown)
- Signature 6 (Mismatch repair)
- NA

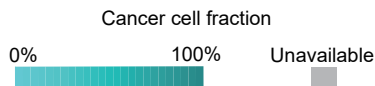

- TP53 Clonal mutated gene in all samples of this branch
- TP53 Clonal mutated gene in some samples of this branch
- TP53 Subclonal mutated gene in all samples of this branch
- TP53 Clonality information unavailable in some samples of this branch
- TP53 Amplificated gene in all samples of this branch
- TP53 Deleted gene in all samples of this branch

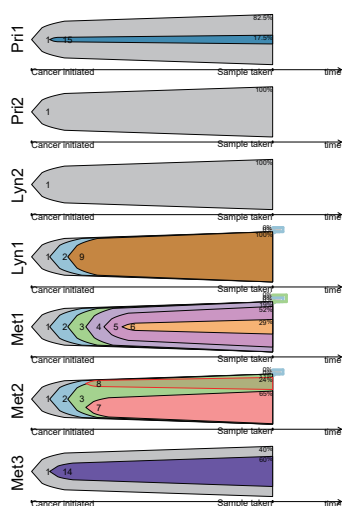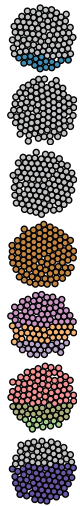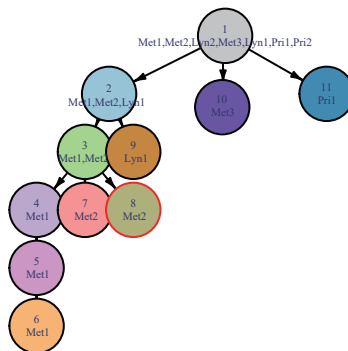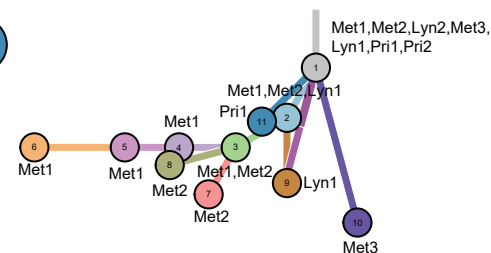

- 1: NULL
- 2: SPEN
- 3: NULL
- 4: Amp\_MED12L;Amp\_MYC;Del\_EP300;Amp\_PIK3CA
- 5: NULL
- 6: SETBP1;MECOM
- 7: NULL
- 8: LYL1
- 9: NULL
- 10: ATF1;ZFH3;CRT3;CAD;UBE2Z; ARHGAP26;MED12L;Del\_NFKBIA;CREB1;SH3PXD2A; SOX17;Del\_CCND1;NF1;Del\_ATG13;MAP3K11; MDN1;
- 11: NULL

- Unique location
- Multiple location

O

P15

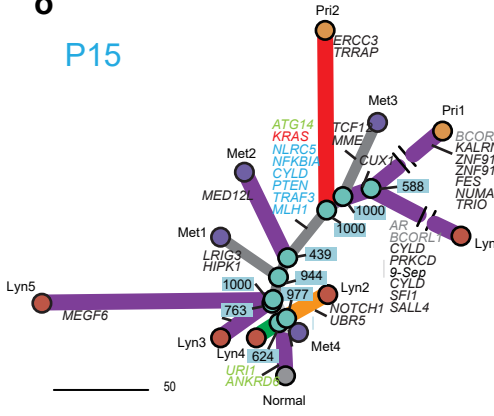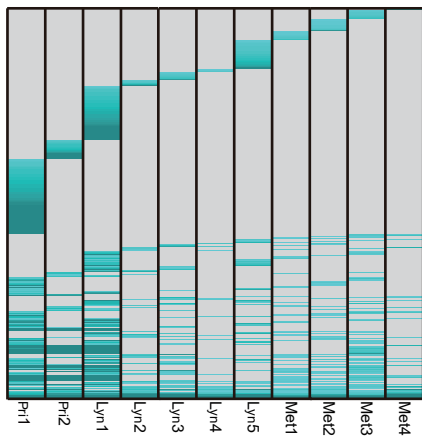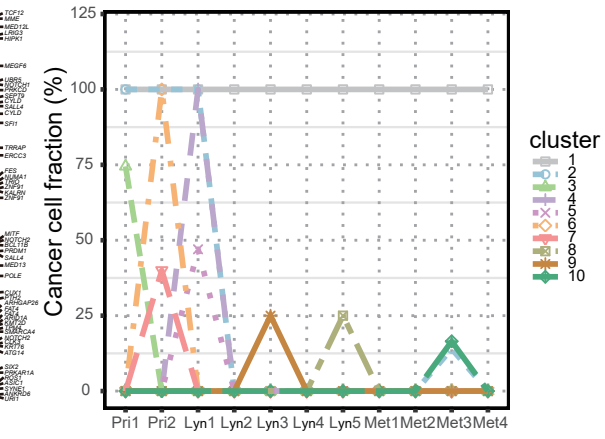

- Primary tumor
- Progressed tumor
- Normal tissue
- Primary tumor
- Lymphatic metastasis
- Distant metastasis
- Evolution node
- Signature 1 (Age)
- Signature 2 (APOBEC)
- Signature 13 (APOBEC)
- Signature 4 (Tobacco)
- Signature 5 (Unknown)
- Signature 6 (Mismatch repair)
- NA

- Cancer cell fraction
- 0% 100% Unavailable
- TP53 Clonal mutated gene in all samples of this branch
  - TP53 Clonal mutated gene in some samples of this branch
  - TP53 Subclonal mutated gene in all samples of this branch
  - TP53 Clonality information unavailable in some samples of this branch
  - TP53 Amplified gene in all samples of this branch
  - TP53 Deleted gene in all samples of this branch

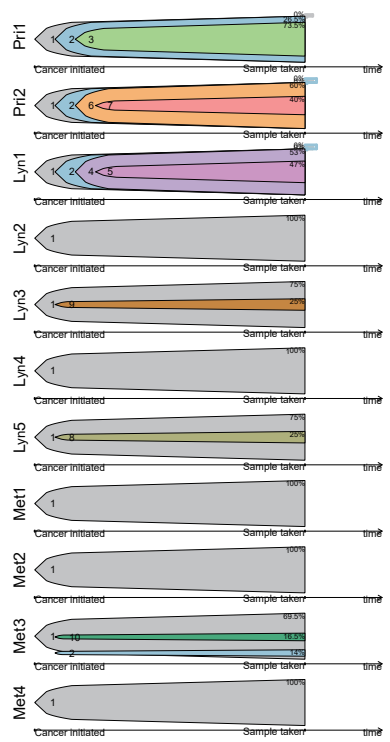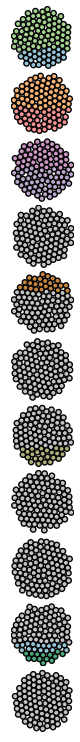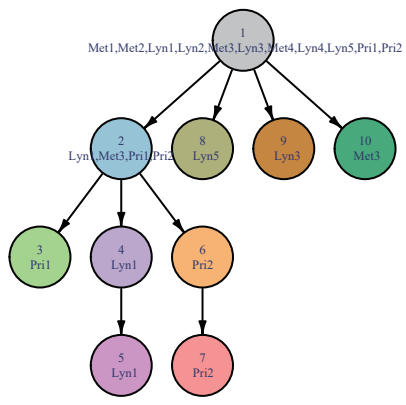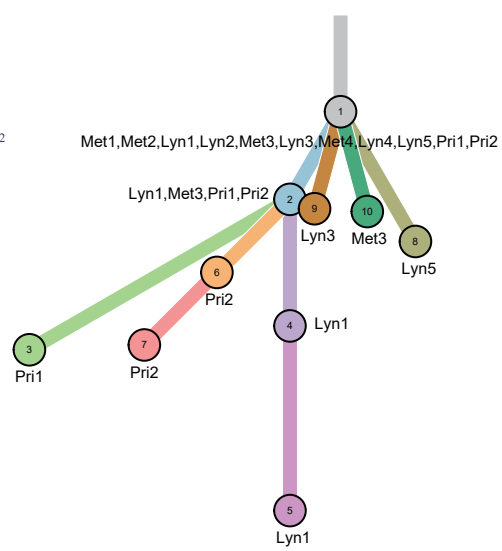

- 1: NULL
- 2: Del\_PTEN;Del\_NLRCS;Del\_MLH1;Del\_NFKBIA;Amp\_KRAS;TPM4;Del\_CYLD;Del\_KMT2C;ATG14;
- 3: ZNF91;TRIO;NUMA1;FES;Del\_NOTCH1;AHNAK2;FAT4;KALRN;
- 4: NULL
- 5: CYLD;SEPT9;SALL4;PRKCD
- 6: ERCC3
- 7: TRRAP
- 8: NOTCH2
- 9: NULL
- 10: NULL

- Unique location
- Multiple location

P

P16

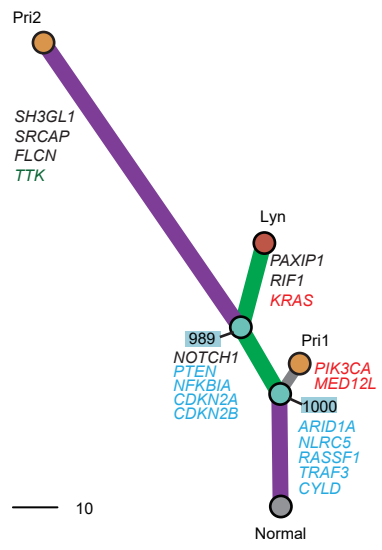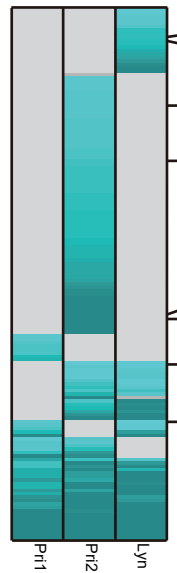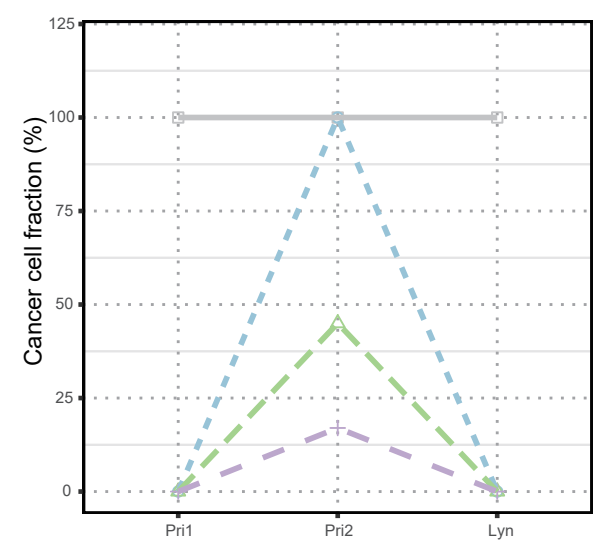

cluster  
1  
2  
3  
4

- Primary tumor
- Progressed tumor
- Normal tissue
- Primary tumor
- Lymphatic metastasis
- Distant metastasis
- Evolution node
- Signature 1 (Age)
- Signature 2 (APOBEC)
- Signature 13 (APOBEC)
- Signature 4 (Tobacco)
- Signature 5 (Unknown)
- Signature 6 (Mismatch repair)
- NA

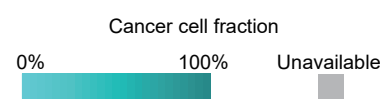

- TP53 Clonal mutated gene in all samples of this branch
- TP53 Clonal mutated gene in some samples of this branch
- TP53 Subclonal mutated gene in all samples of this branch
- TP53 Clonality information unavailable in some samples of this branch
- TP53 Amplificated gene in all samples of this branch
- TP53 Deleted gene in all samples of this branch

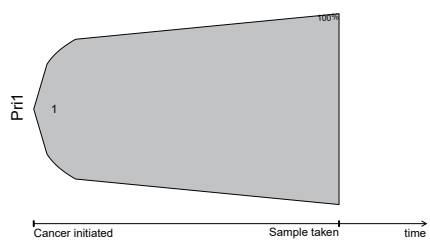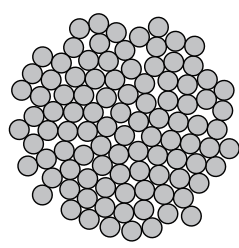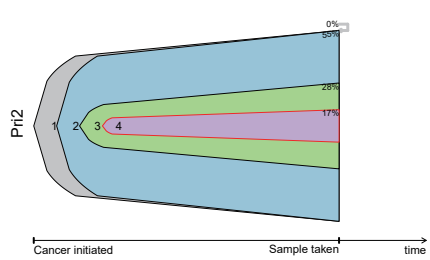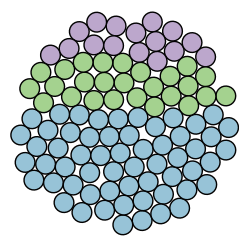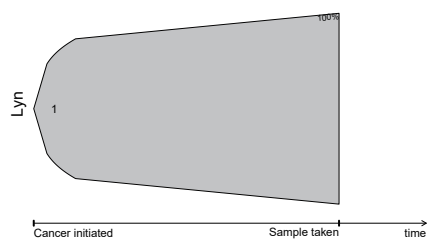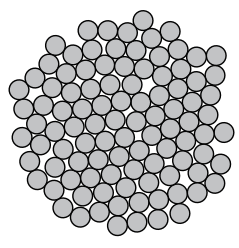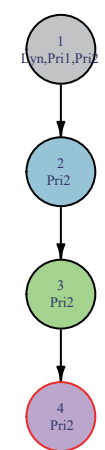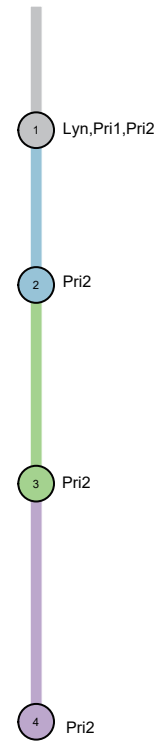

- 1: Del\_ARID1A;Del\_NLR5;Del\_RASSF1;Del\_TRAF3
- 2: Del\_CDKN2A;SRCAP;TTK;Del\_JAK2;Del\_CDKN2B
- 3: FLCN
- 4: SH3GL1;RUNX1

- Unique location
- Multiple location

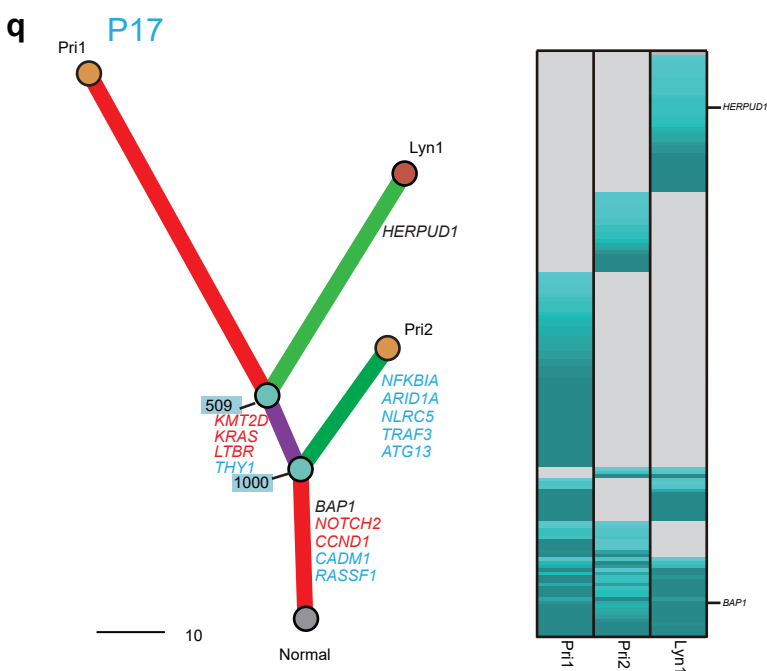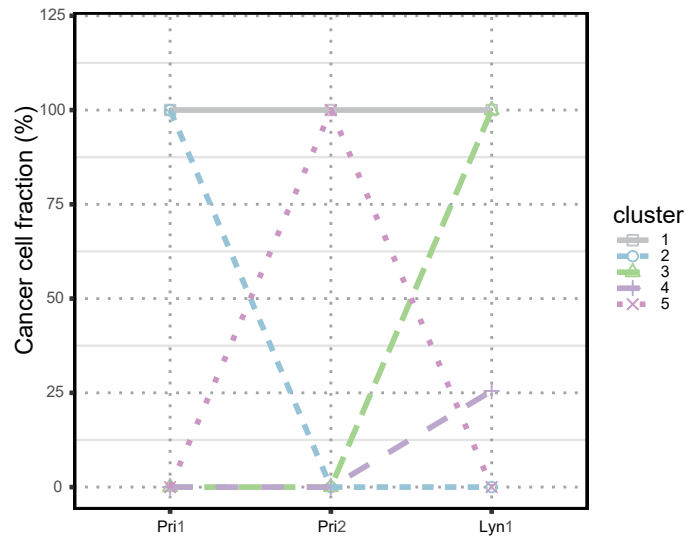

- Primary tumor
- Progressed tumor
- Normal tissue
- Primary tumor
- Lymphatic metastasis
- Distant metastasis
- Evolution node
- Signature 1 (Age)
- Signature 2 (APOBEC)
- Signature 13 (APOBEC)
- Signature 4 (Tobacco)
- Signature 5 (Unknown)
- Signature 6 (Mismatch repair)
- NA

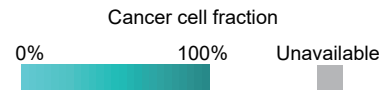

- TP53 Clonal mutated gene in all samples of this branch
- TP53 Clonal mutated gene in some samples of this branch
- TP53 Subclonal mutated gene in all samples of this branch
- TP53 Clonality information unavailable in some samples of this branch
- TP53 Amplificated gene in all samples of this branch
- TP53 Deleted gene in all samples of this branch

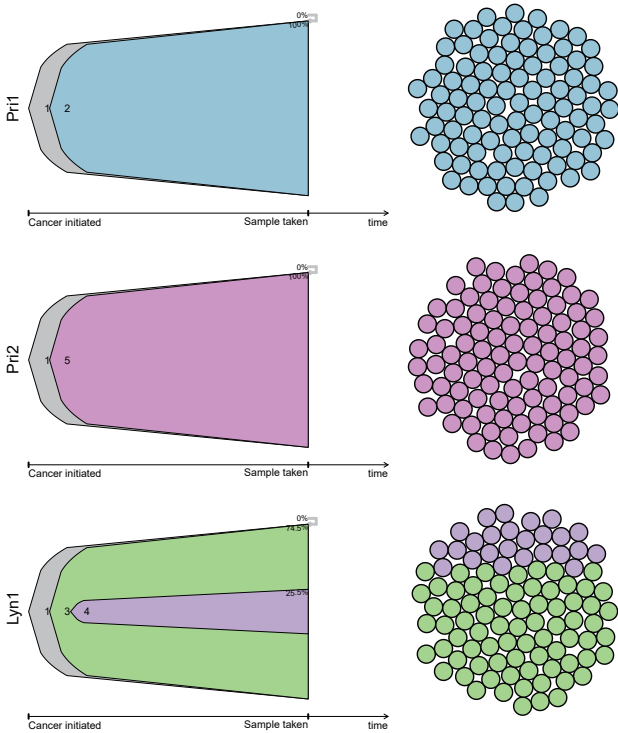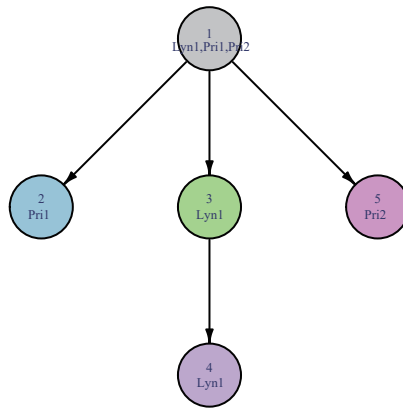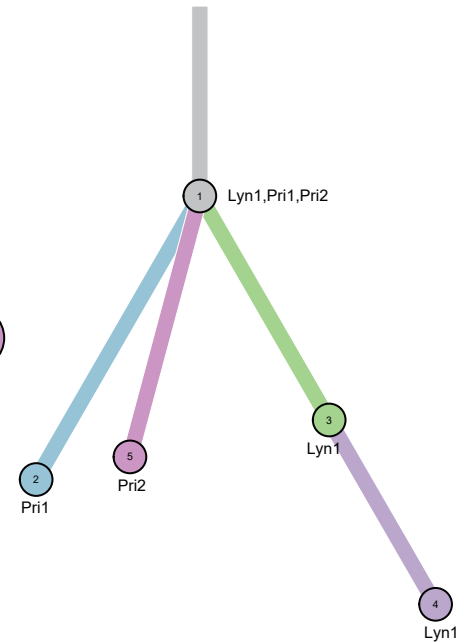

- 1: Amp\_NOTCH2;Amp\_CCND1;Del\_CADM1;Del\_RASSF1
- 2: NULL
- 3: NULL
- 4: NULL
- 5: Amp\_FBXW7;Del\_ARID1A;Del\_NLRC5;Del\_LTBR;Del\_NFKBIA;Del\_AKT2;Del\_KMT2D;Del\_NOTCH1;Del\_TRAF3;Amp\_CDKN2A;Amp\_CDKN2B;Del\_ATG13;

- Unique location
- Multiple location

P18

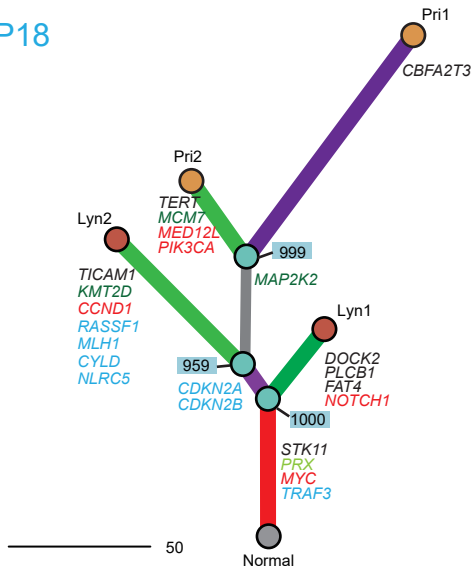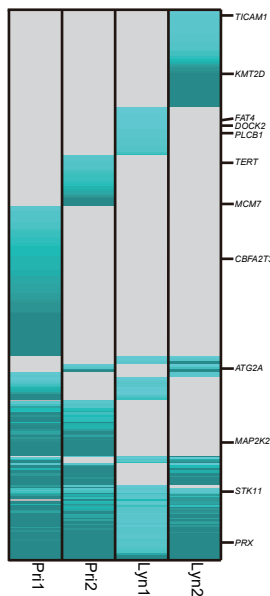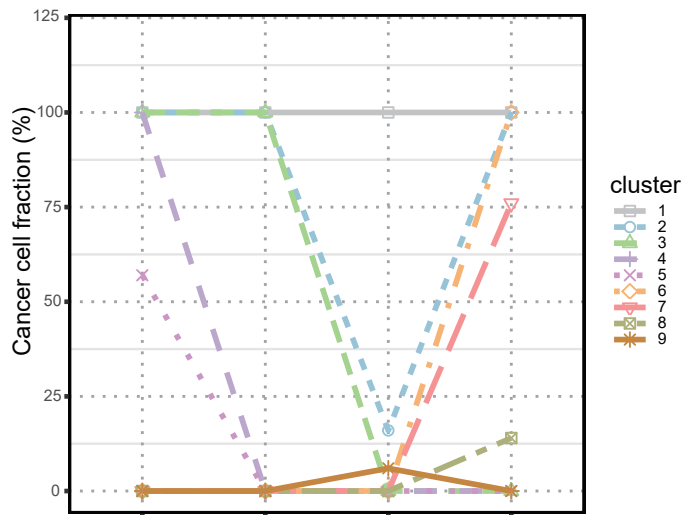

- Primary tumor
- Progressed tumor
- Normal tissue
- Primary tumor
- Lymphatic metastasis
- Distant metastasis
- Evolution node
- Signature 1 (Age)
- Signature 2 (APOBEC)
- Signature 13 (APOBEC)
- Signature 4 (Tobacco)
- Signature 5 (Unknown)
- Signature 6 (Mismatch repair)
- NA

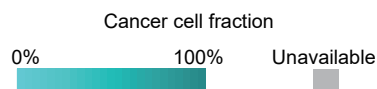

- TP53 Clonal mutated gene in all samples of this branch
- TP53 Clonal mutated gene in some samples of this branch
- TP53 Subclonal mutated gene in all samples of this branch
- TP53 Clonality information unavailable in some samples of this branch
- TP53 Amplified gene in all samples of this branch
- TP53 Deleted gene in all samples of this branch

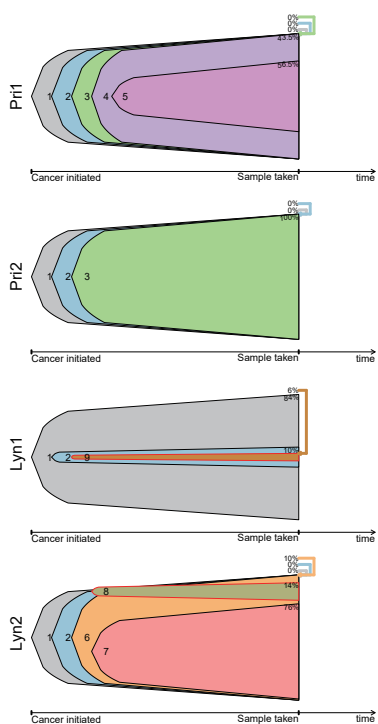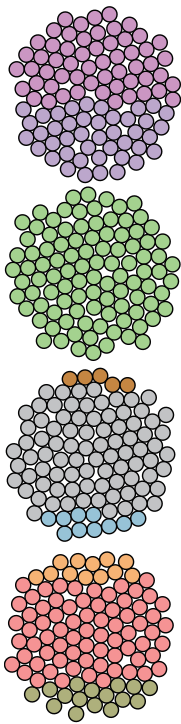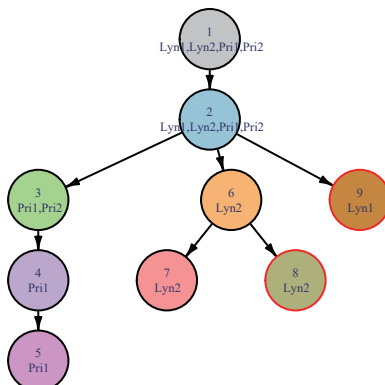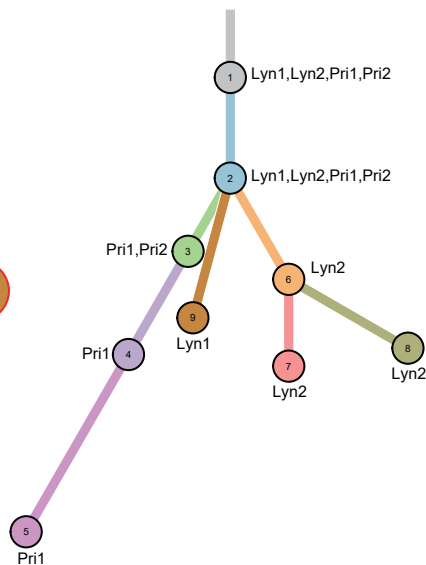

- 1: NULL
- 2: PRX
- 3: MAP2K2
- 4: Del\_JAK2
- 5: CBFA2T3
- 6: KMT2D
- 7: Amp\_TP53;Del\_NLRC5;Amp\_THY1;Del\_LTBR;Del\_MLH1;Amp\_CCND1;Del\_RASSF1;Del\_CYLD;Del\_KMT2C;Amp\_CADM1
- 8: AHNAK;TICAM1
- 9: Amp\_NOTCH1;AHNAK2;FAT4;DOCK2

- Unique location
- Multiple location



S

P19

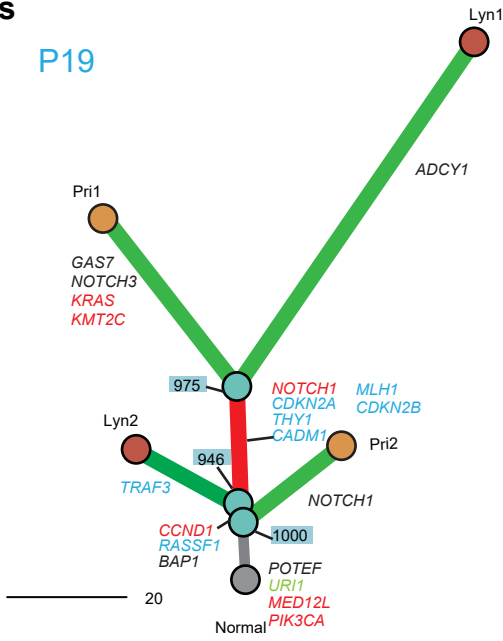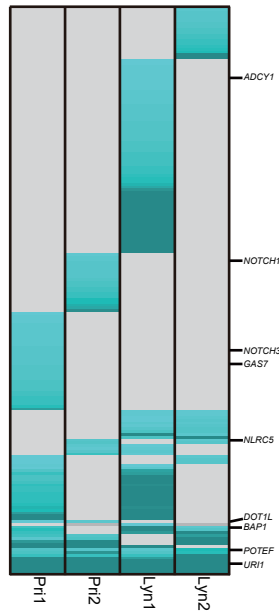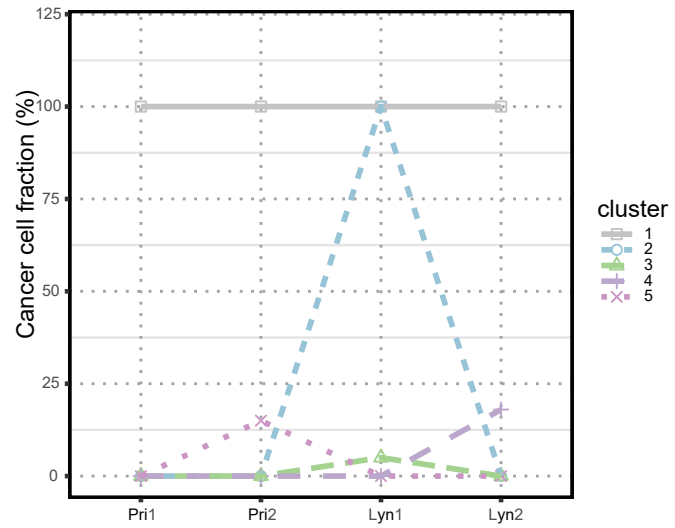

- Primary tumor
- Prigrress tumor
- Normal tissue
- Primary tumor
- Lymphatic metastasis
- Distant metastasis
- Evolution node
- Signature 1 (Age)
- Signature 2 (APOBEC)
- Signature 13 (APOBEC)
- Signature 4 (Tobacco)
- Signature 5 (Unknown)
- Signature 6 (Mismatch repair)
- NA

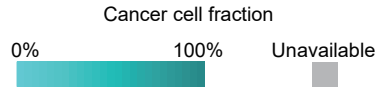

- TP53 Clonal mutated gene in all samples of this branch
- TP53 Clonal mutated gene in some samples of this branch
- TP53 Subclonal mutated gene in all samples of this branch
- TP53 Clonality infomation unavailable in some samples of this branch
- TP53 Amplificated gene in all samples of this branch
- TP53 Deleted gene in all samples of this branch

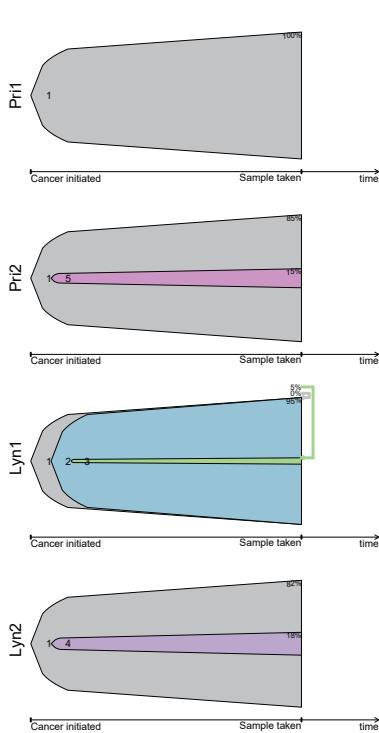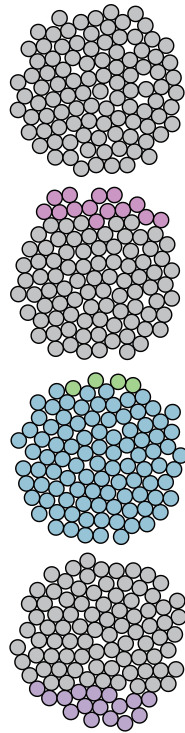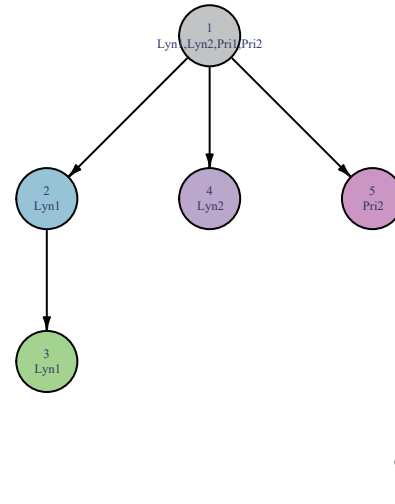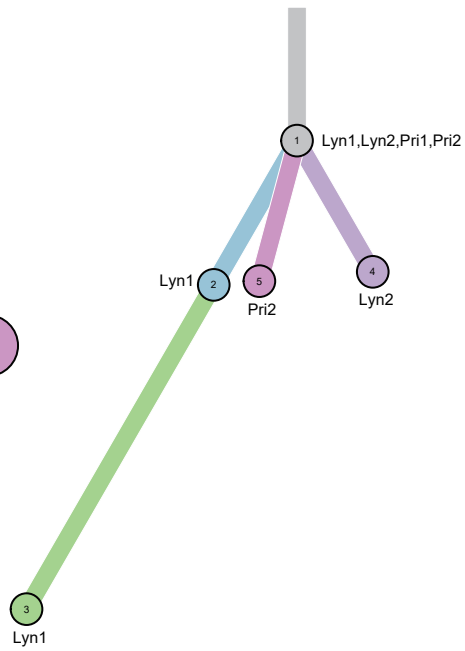

- 1: URI1;Amp\_MED12L;Amp\_PIK3CA
- 2: NULL
- 3: NOTCH3;AHNAK;ADCY1;GAS7
- 4: NULL
- 5: NOTCH1;DOT1L

- Unique location
- Multiple location

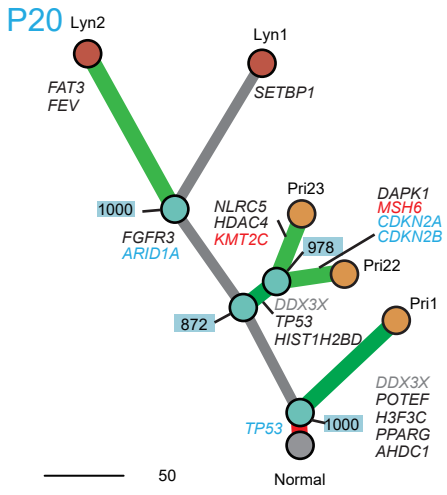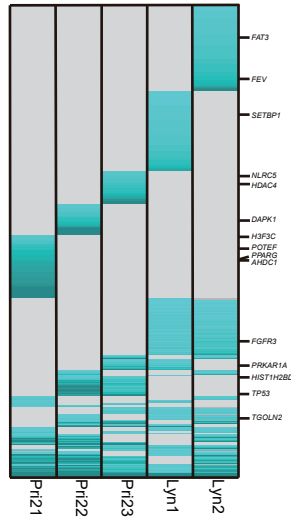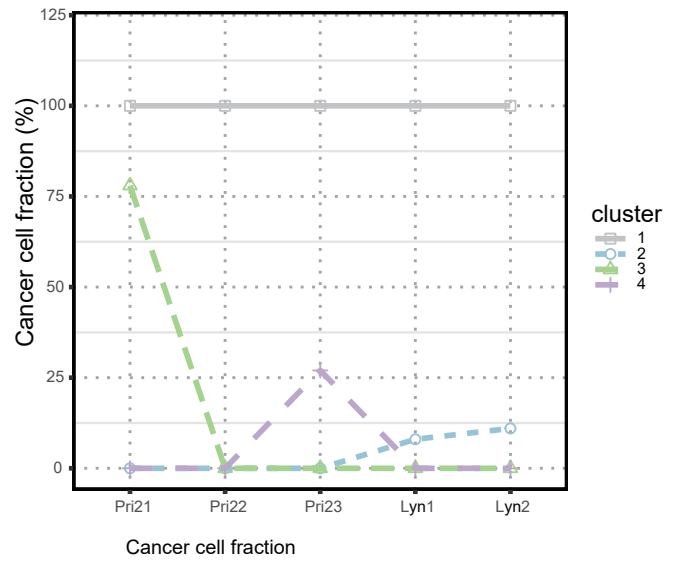

- Primary tumor
- Progressed tumor
- Normal tissue
- Primary tumor
- Lymphatic metastasis
- Distant metastasis
- Evolution node
- Signature 1 (Age)
- Signature 2 (APOBEC)
- Signature 13 (APOBEC)
- Signature 4 (Tobacco)
- Signature 5 (Unknown)
- Signature 6 (Mismatch repair)
- NA

- TP53 Clonal mutated gene in all samples of this branch
- TP53 Clonal mutated gene in some samples of this branch
- TP53 Subclonal mutated gene in all samples of this branch
- TP53 Clonality information unavailable in some samples of this branch
- TP53 Amplified gene in all samples of this branch
- TP53 Deleted gene in all samples of this branch

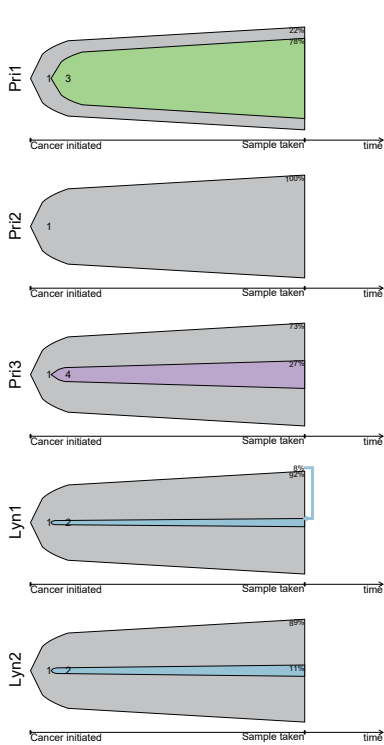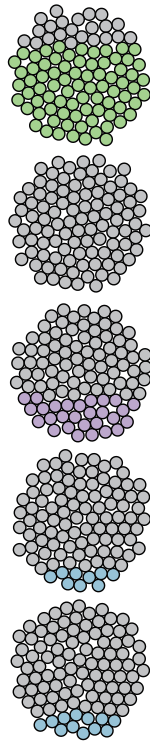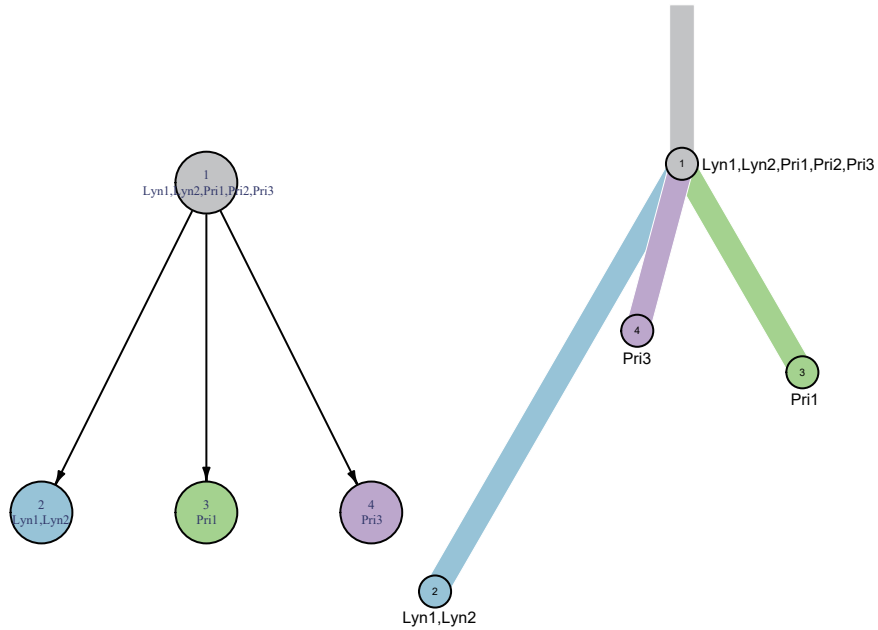

- 1: Del\_TP53
- 2: SETBP1;FEV;FAT3
- 3: PPARG;AHDC1
- 4: NLRC5

- Unique location
- Multiple location

u

P21

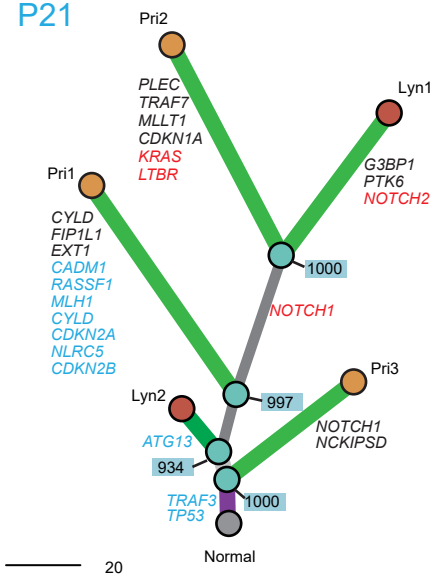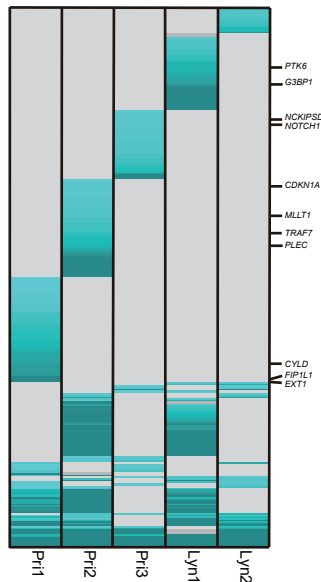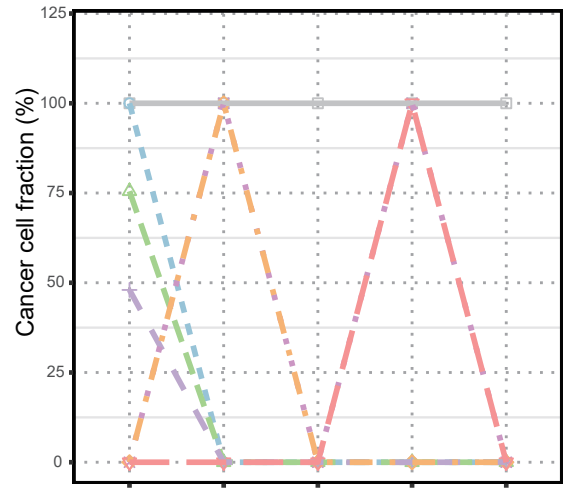

cluster  
1  
2  
3  
4  
5  
6  
7

- Primary tumor
- Progressed tumor
- Normal tissue
- Primary tumor
- Lymphatic metastasis
- Distant metastasis
- Evolution node
- Signature 1 (Age)
- Signature 2 (APOBEC)
- Signature 13 (APOBEC)
- Signature 4 (Tobacco)
- Signature 5 (Unknown)
- Signature 6 (Mismatch repair)
- NA

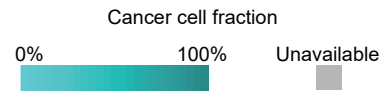

- TP53 Clonal mutated gene in all samples of this branch
- TP53 Clonal mutated gene in some samples of this branch
- TP53 Subclonal mutated gene in all samples of this branch
- TP53 Clonality information unavailable in some samples of this branch
- TP53 Amplificated gene in all samples of this branch
- TP53 Deleted gene in all samples of this branch

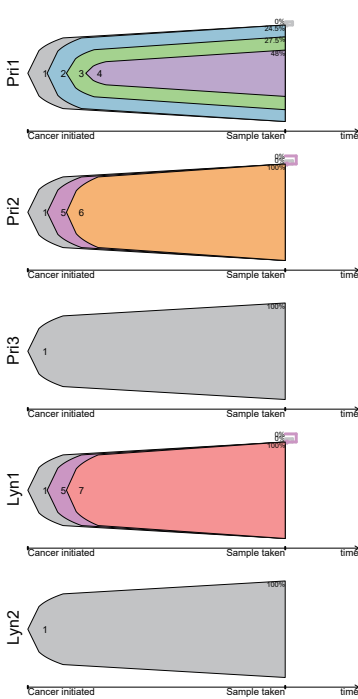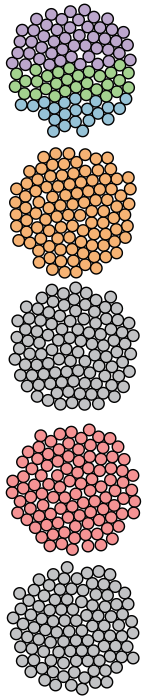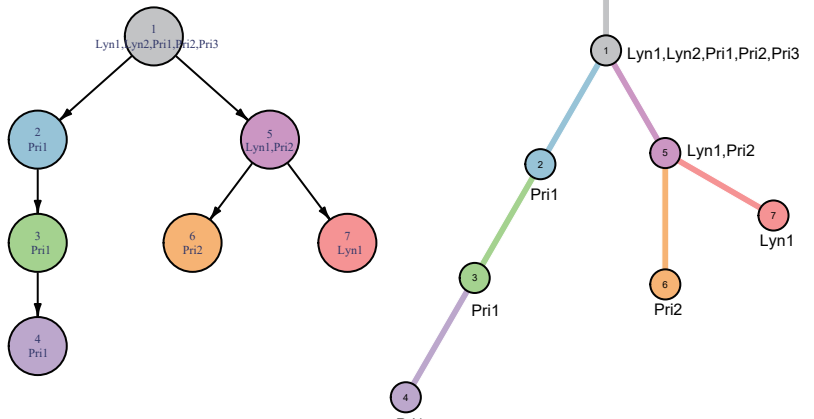

- 1: Del\_TRAF3;Del\_TP53
- 2: EXT1;Del\_CDKN2A;Del\_NLRC5;Del\_MLH1;FIP1L1  
Del\_CADM1;Del\_RASSF1;Del\_CYLD;Amp\_ATG13;Del\_CDKN2B
- 3: CYLD
- 4: NULL
- 5: Amp\_NOTCH1
- 6: Amp\_FBXW7;Amp\_LTBR;Amp\_KRAS
- 7: Amp\_NOTCH2;Amp\_CADM1

- Unique location
- Multiple location

v

P22

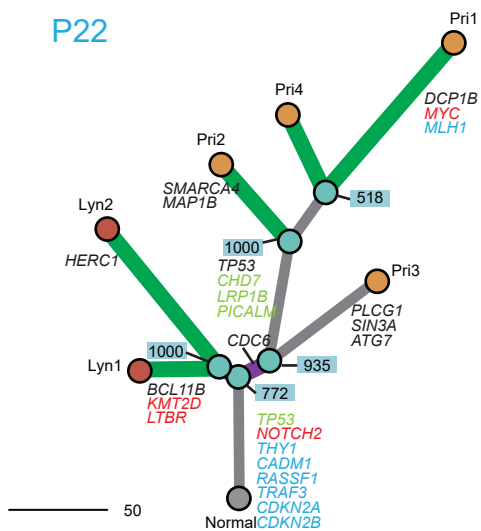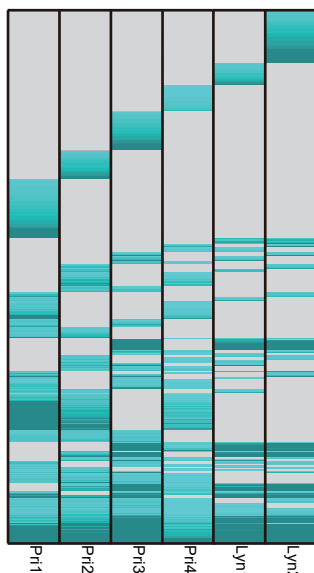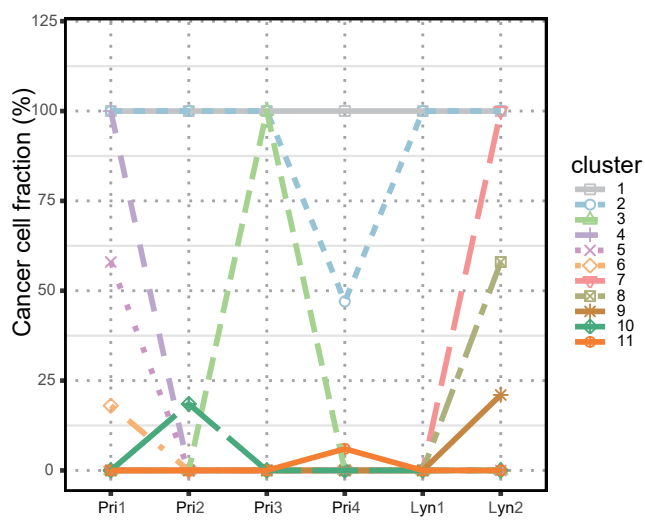

- Primary tumor
- Progressed tumor
- Normal tissue
- Primary tumor
- Lymphatic metastasis
- Distant metastasis
- Evolution node
- Signature 1 (Age)
- Signature 2 (APOBEC)
- Signature 13 (APOBEC)
- Signature 4 (Tobacco)
- Signature 5 (Unknown)
- Signature 6 (Mismatch repair)
- NA

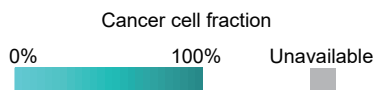

- TP53 Clonal mutated gene in all samples of this branch
- TP53 Clonal mutated gene in some samples of this branch
- TP53 Subclonal mutated gene in all samples of this branch
- TP53 Clonality information unavailable in some samples of this branch
- TP53 Amplified gene in all samples of this branch
- TP53 Deleted gene in all samples of this branch

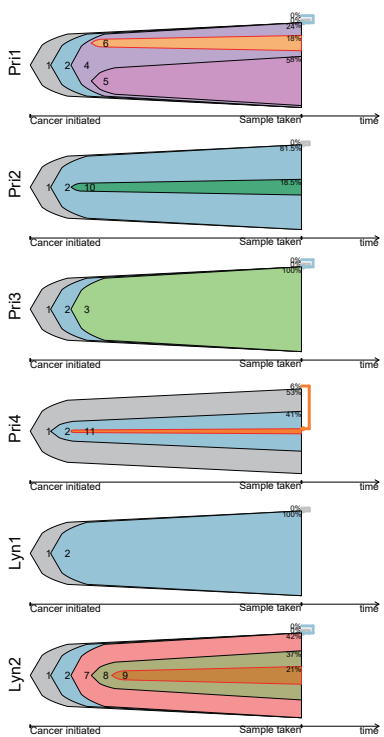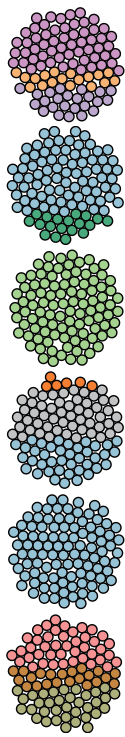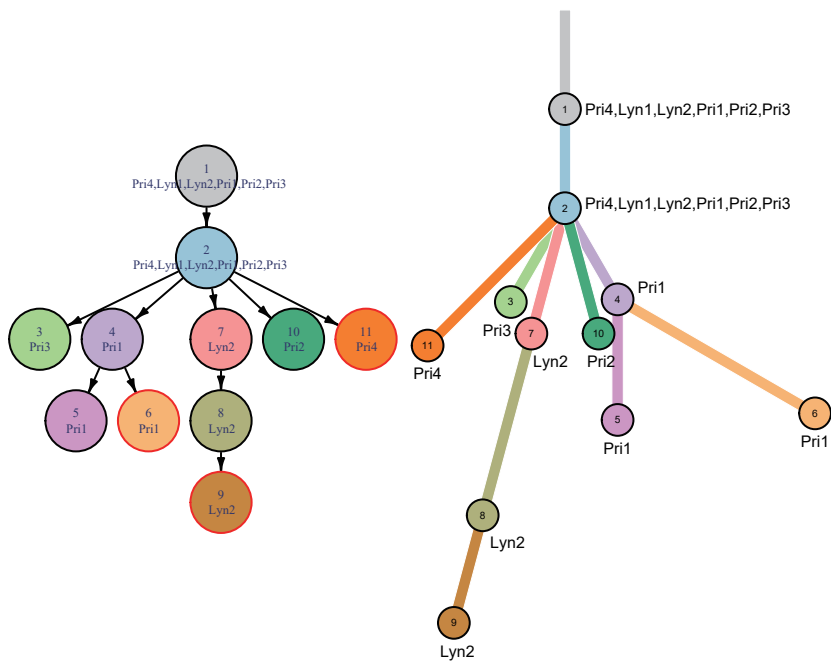

- 1: NULL
- 2: Del\_CDKN2A;Del\_THY1;Del\_CADM1;Del\_RASSF1;Del\_TRAF3;Del\_JAK2;Del\_CDKN2B;
- 3: NULL
- 4: Del\_MLH1;Amp\_MYC
- 5: DCP1B
- 6: NULL
- 7: HERC1
- 8: NULL
- 9: NULL
- 10: SMARCA4
- 11: AHNAK2;PLCG1

- Unique location
- Multiple location

**W**

**P23**

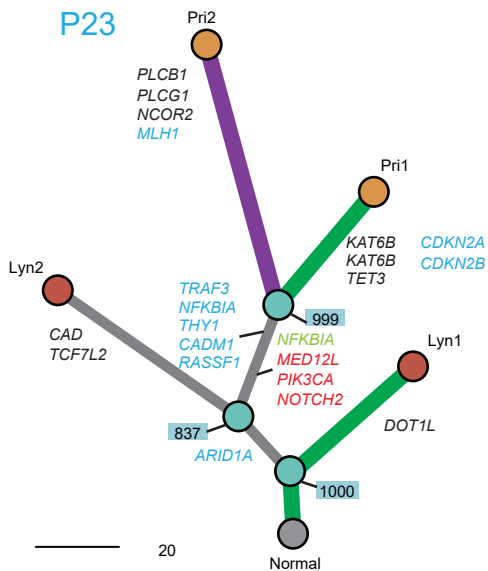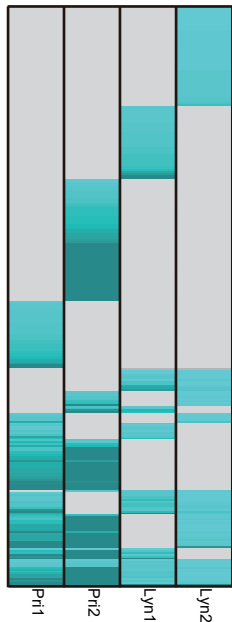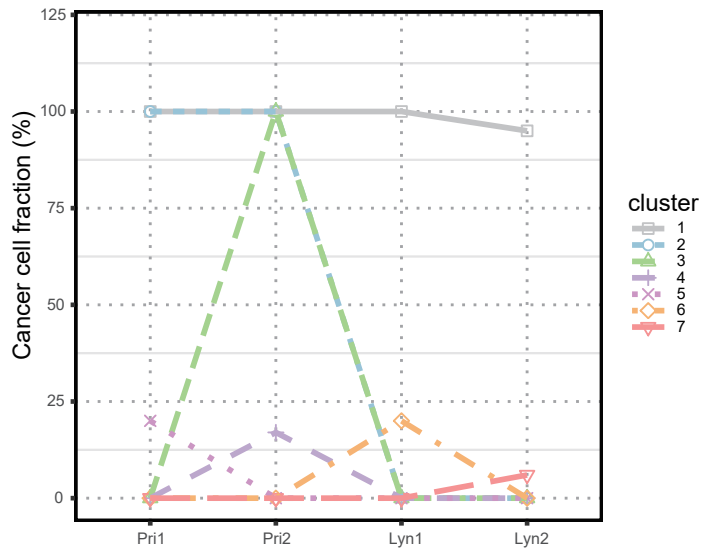

- Primary tumor
- Progressed tumor
- Normal tissue
- Primary tumor
- Lymphatic metastasis
- Distant metastasis
- Evolution node
- Signature 1 (Age)
- Signature 2 (APOBEC)
- Signature 13 (APOBEC)
- Signature 4 (Tobacco)
- Signature 5 (Unknown)
- Signature 6 (Mismatch repair)
- NA

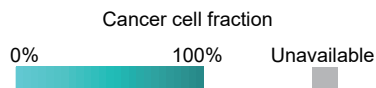

- TP53 Clonal mutated gene in all samples of this branch
- TP53 Clonal mutated gene in some samples of this branch
- TP53 Subclonal mutated gene in all samples of this branch
- TP53 Clonality information unavailable in some samples of this branch
- TP53 Amplified gene in all samples of this branch
- TP53 Deleted gene in all samples of this branch

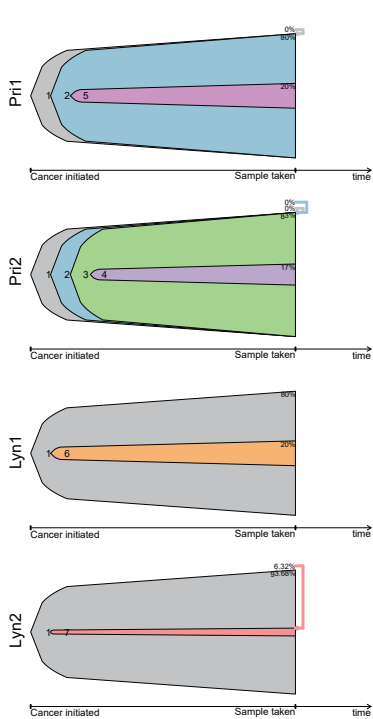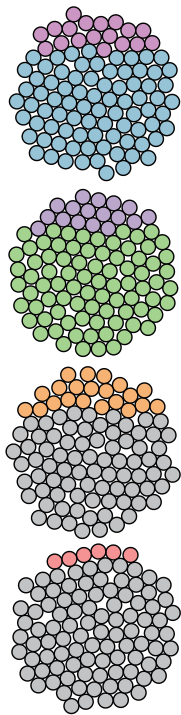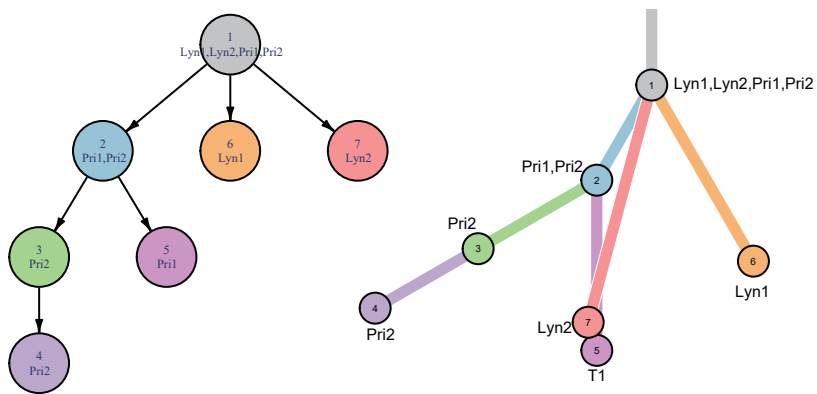

- 1: NULL
- 2: Del\_THY1;Del\_NFKBIA;Del\_CADM1;Amp\_MED12L;Del\_RASSF1;Del\_TRAF3;Amp\_PIK3CA;
- 3: Del\_MLH1
- 4: NULL
- 5: KAT6B;CRT1;TET3
- 6: DOT1L
- 7: TCF7L2;CAD;PLCG1

- Unique location
- Multiple location

P24

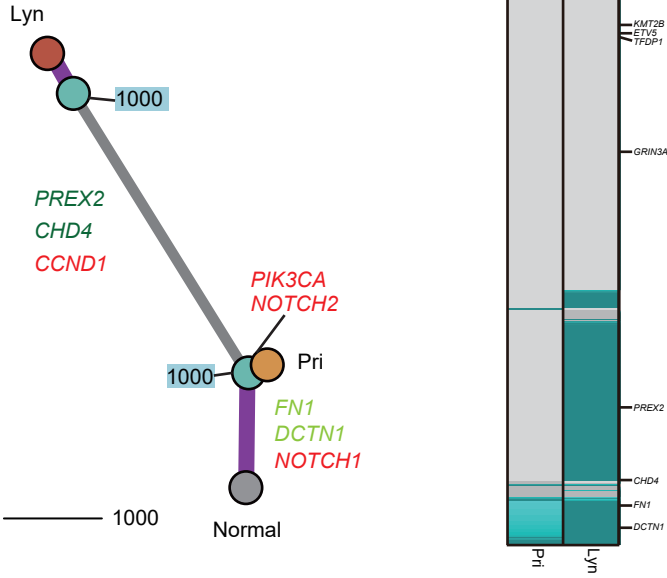

- Primary tumor
- Progressed tumor
- Normal tissue
- Primary tumor
- Lymphatic metastasis
- Distant metastasis
- Evolution node
- Signature 1 (Age)
- Signature 2 (APOBEC)
- Signature 13 (APOBEC)
- Signature 4 (Tobacco)
- Signature 5 (Unknown)
- Signature 6 (Mismatch repair)
- NA

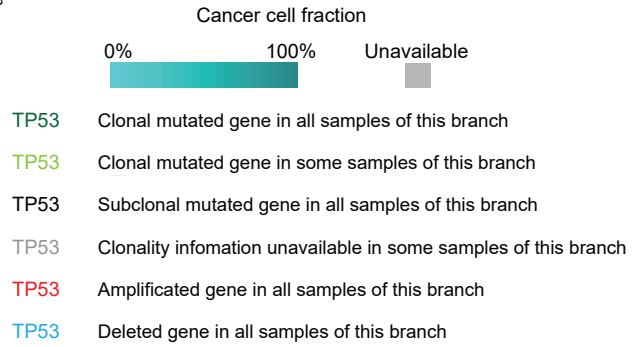

y

P25

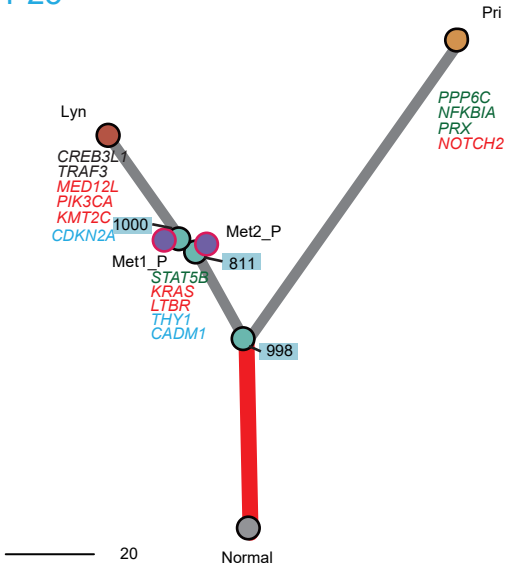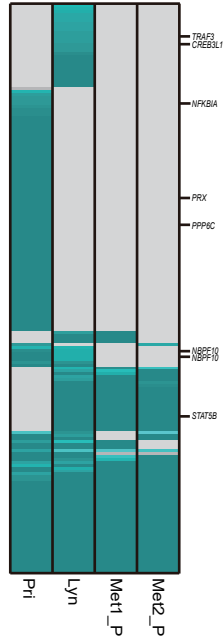

- Primary tumor
- Progressed tumor
- Normal tissue
- Primary tumor
- Lymphatic metastasis
- Distant metastasis
- Evolution node

- Signature 1 (Age)
- Signature 2 (APOBEC)
- Signature 13 (APOBEC)
- Signature 4 (Tobacco)
- Signature 5 (Unknown)
- Signature 6 (Mismatch repair)
- NA

- Cancer cell fraction
- 0% 100% Unavailable
- TP53 Clonal mutated gene in all samples of this branch
  - TP53 Clonal mutated gene in some samples of this branch
  - TP53 Subclonal mutated gene in all samples of this branch
  - TP53 Clonality information unavailable in some samples of this branch
  - TP53 Amplificated gene in all samples of this branch
  - TP53 Deleted gene in all samples of this branch

P26

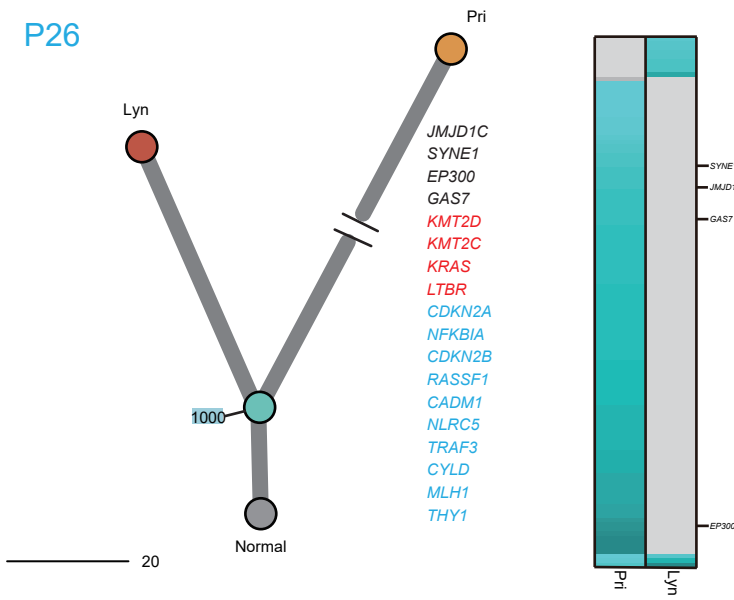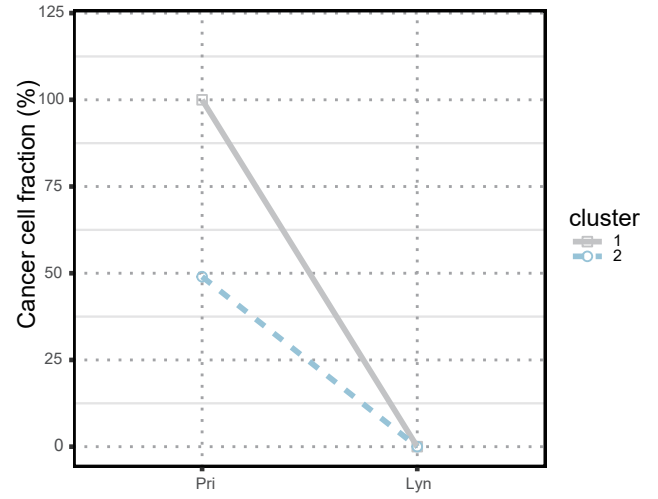

- Primary tumor
- Progressed tumor
- Normal tissue
- Primary tumor
- Lymphatic metastasis
- Distant metastasis
- Evolution node
- Signature 1 (APOBEC)
- Signature 2 (Mismatch rep)
- Signature 13 (Smoking)
- Signature 4
- Signature 5
- Signature 6
- NA

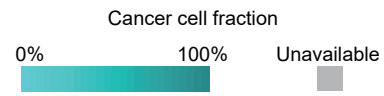

- TP53 Clonal mutated gene in all samples of this branch
- TP53 Clonal mutated gene in some samples of this branch
- TP53 Subclonal mutated gene in all samples of this branch
- TP53 Clonality information unavailable in some samples of this branch
- TP53 Amplified gene in all samples of this branch
- TP53 Deleted gene in all samples of this branch

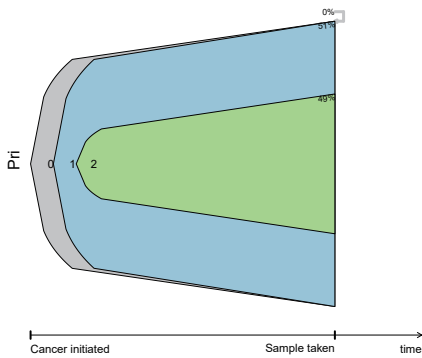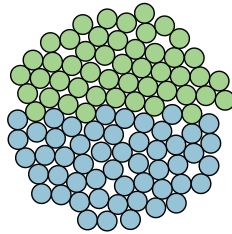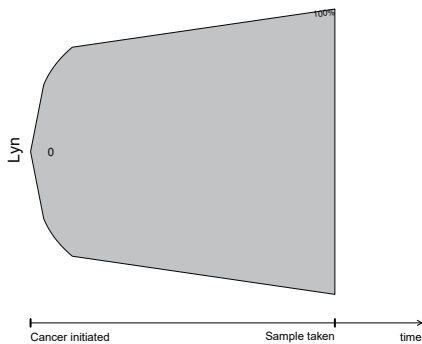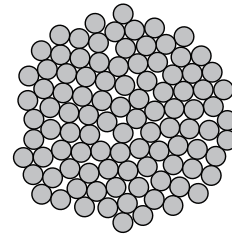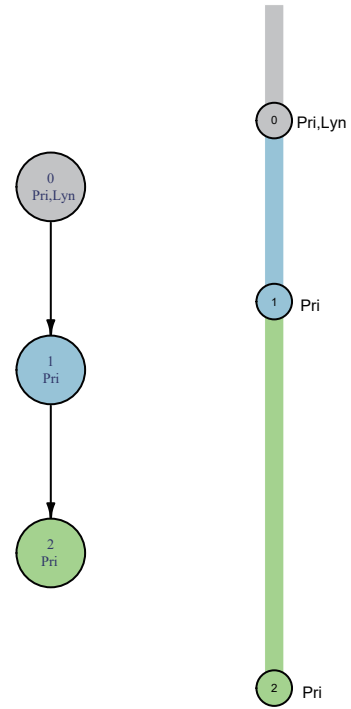

- 0: NULL  
Del\_CDKN2A;Del\_NLRC5;Amp\_LTBR;Amp\_KRAS;Del\_CADM1  
Del\_NOTCH1;Del\_CYLD;Del\_CDKN2B;Amp\_KMT2D;Del\_THY1
- 1:  
Amp\_KMT2C;Del\_MLH1;Del\_NFKBIA;Del\_RASSF1;Del\_TRAF3  
Del\_JAK2;
- 2: JMJD1C;GAS7;SYNE1

- Unique location
- Multiple location



P27

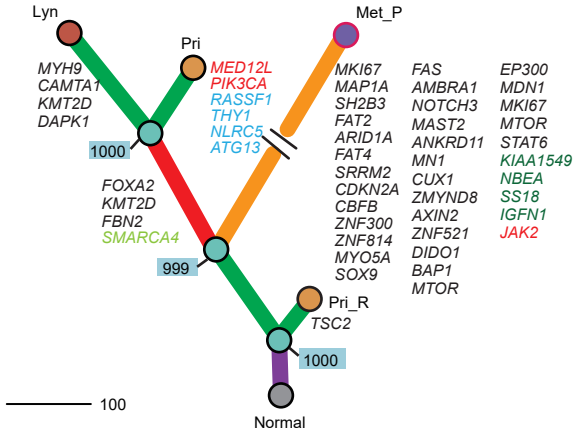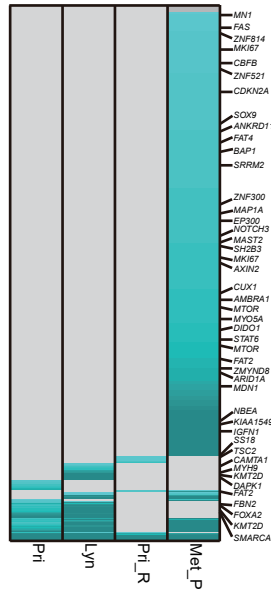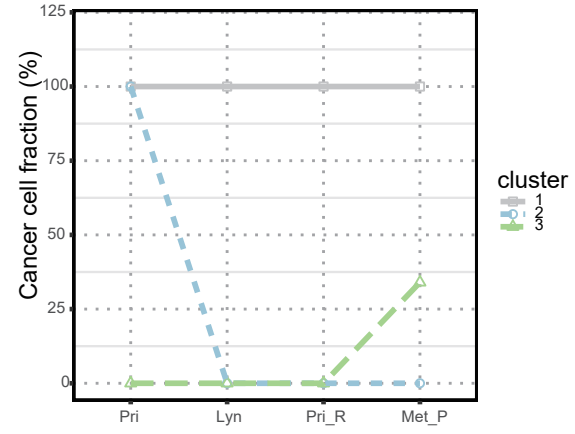

- Primary tumor
- Progressed tumor
- Normal tissue
- Primary tumor
- Lymphatic metastasis
- Distant metastasis
- Evolution node
- Signature 1 (Age)
- Signature 2 (APOBEC)
- Signature 13 (APOBEC)
- Signature 4 (Tobacco)
- Signature 5 (Unknown)
- Signature 6 (Mismatch repair)
- NA

- Cancer cell fraction
- 0% 100% Unavailable
- TP53 Clonal mutated gene in all samples of this branch
  - TP53 Clonal mutated gene in some samples of this branch
  - TP53 Subclonal mutated gene in all samples of this branch
  - TP53 Clonality information unavailable in some samples of this branch
  - TP53 Amplificated gene in all samples of this branch
  - TP53 Deleted gene in all samples of this branch

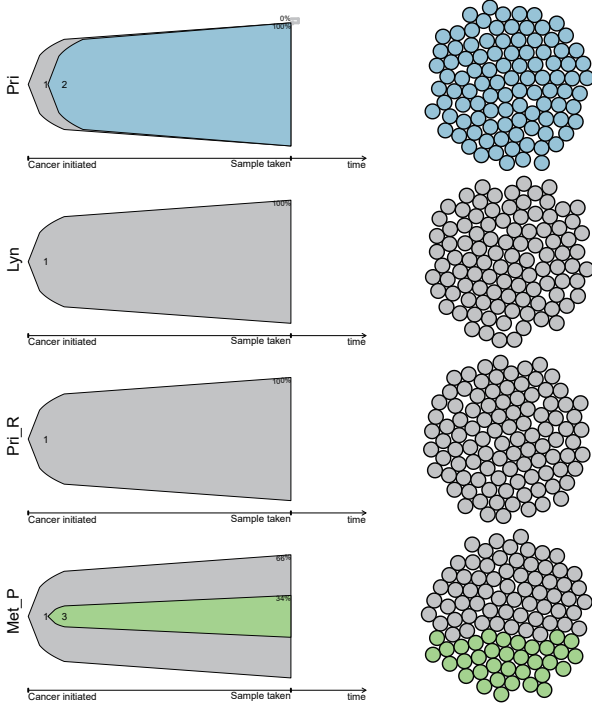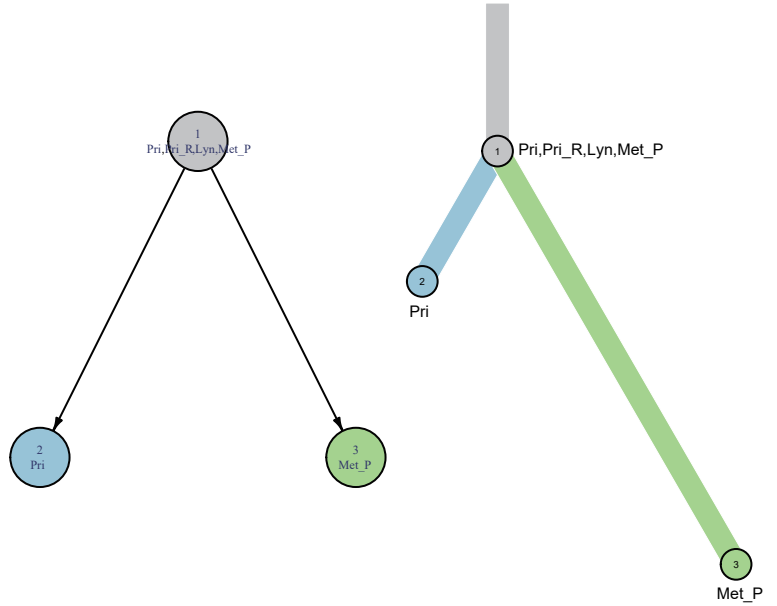

- 1: NULL
- 2: Del\_NLR5; Del\_LTBR; Del\_NOTCH1; Del\_KMT2C; Amp\_CADM1
- 3: NOTCH3; DIDO1; CBF; ANKRD11; MAST2; ZMYND8; AMBRA1; MKI67; GNAI1; KIAA1549

- Unique location
- Multiple location

ab

P28

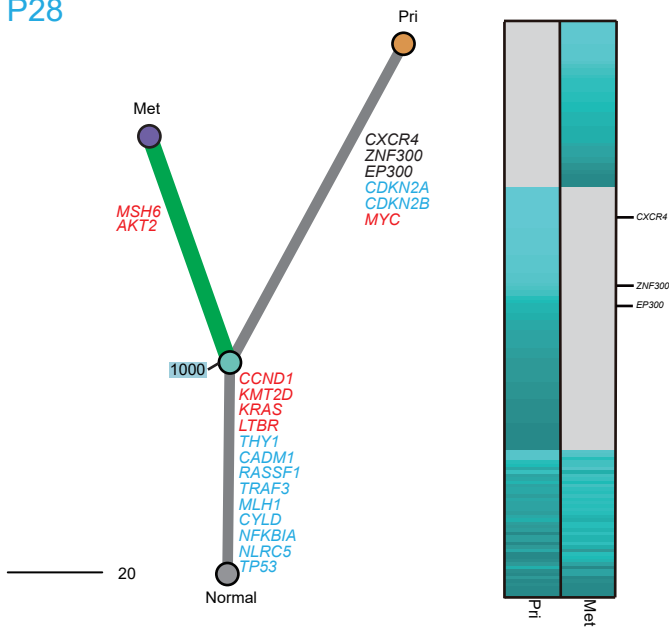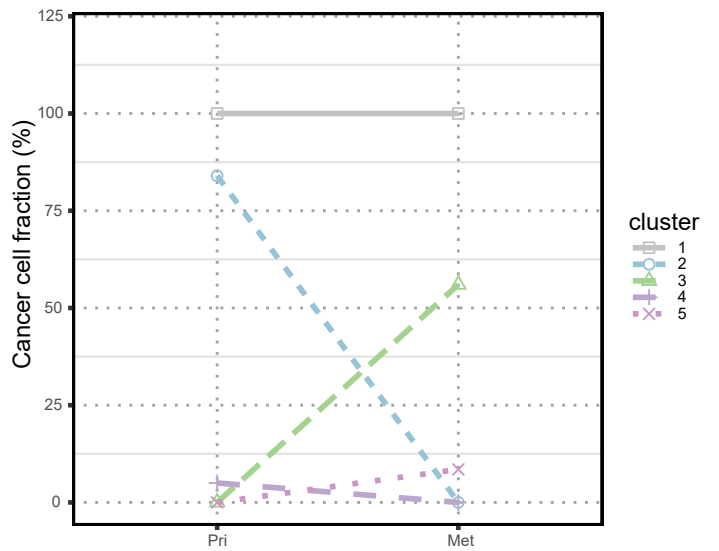

- Primary tumor
- Progressed tumor
- Normal tissue
- Primary tumor
- Lymphatic metastasis
- Distant metastasis
- Evolution node
- Signature 1 (Age)
- Signature 2 (APOBEC)
- Signature 13 (APOBEC)
- Signature 4 (Tobacco)
- Signature 5 (Unknown)
- Signature 6 (Mismatch repair)
- NA

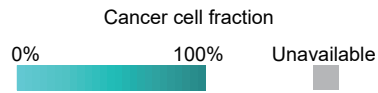

- TP53 Clonal mutated gene in all samples of this branch
- TP53 Clonal mutated gene in some samples of this branch
- TP53 Subclonal mutated gene in all samples of this branch
- TP53 Clonality information unavailable in some samples of this branch
- TP53 Amplificated gene in all samples of this branch
- TP53 Deleted gene in all samples of this branch

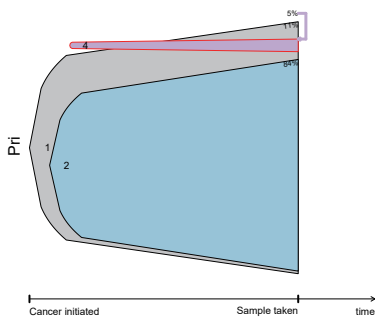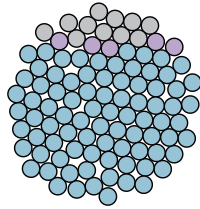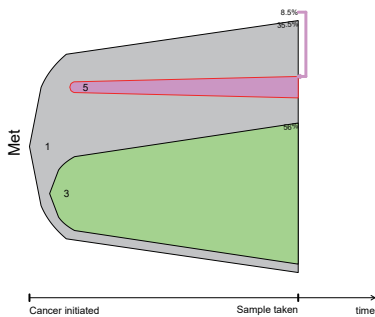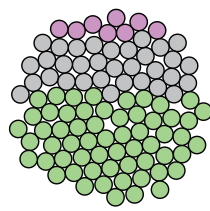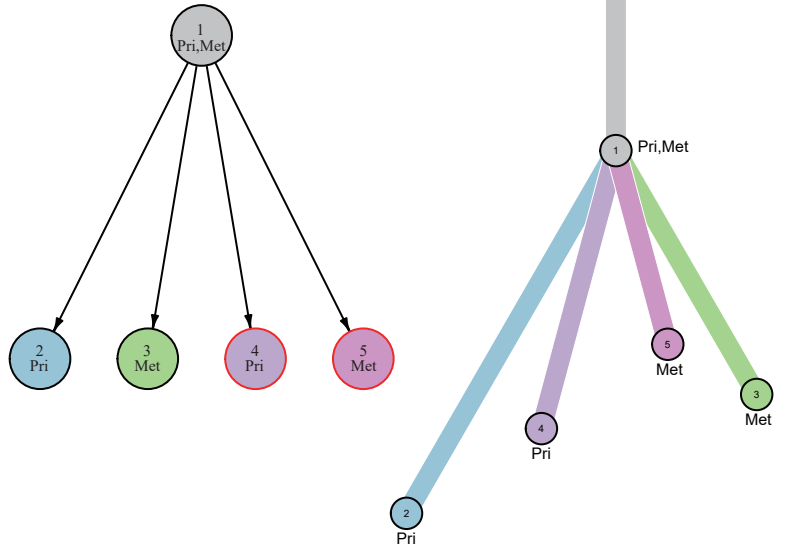

- Del\_NLRC5;Amp\_LTBR;Amp\_KRAS;Amp\_CCND1;Del\_CADM1
- 1: Del\_CYLD;Amp\_KMT2D;Del\_THY1;Del\_MLH1;Del\_NFKBIA  
Del\_RASSF1;Del\_TRAF3;Del\_TP53;
- 2: Del\_CDKN2A;Del\_NOTCH1;Amp\_MYC;EP300;Del\_JAK2  
Del\_CDKN2B;
- 3:NULL
- 4:CXCR4
- 5:NULL

- Unique location
- Multiple location

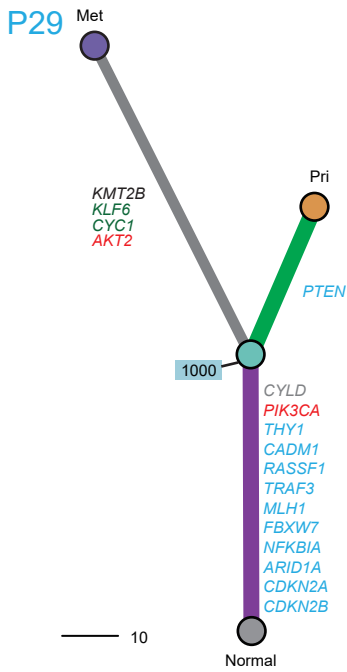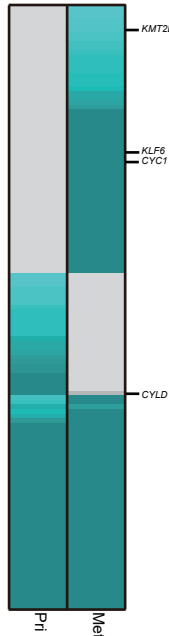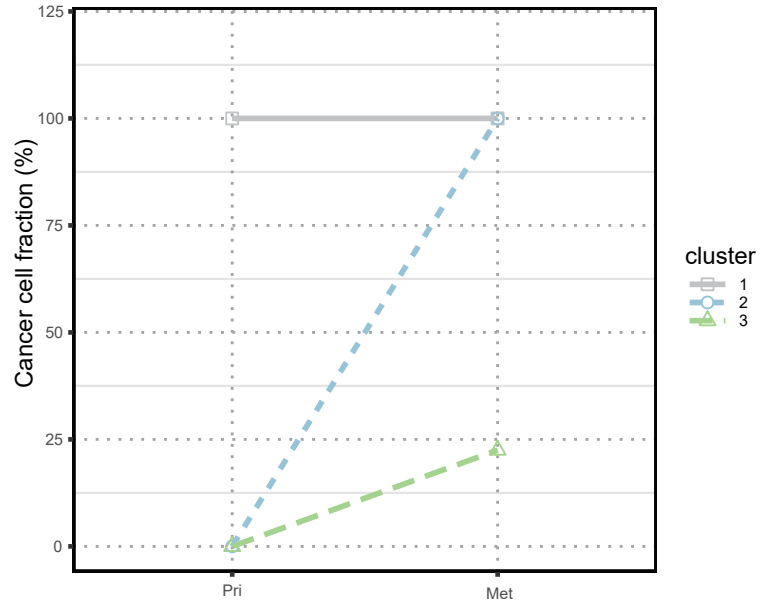

- Primary tumor
- Progressed tumor
- Normal tissue
- Primary tumor
- Lymphatic metastasis
- Distant metastasis
- Evolution node
- Signature 1 (Age)
- Signature 2 (APOBEC)
- Signature 13 (APOBEC)
- Signature 4 (Tobacco)
- Signature 5 (Unknown)
- Signature 6 (Mismatch repair)
- NA

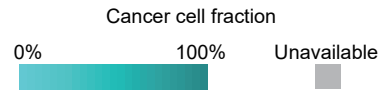

- TP53 Clonal mutated gene in all samples of this branch
- TP53 Clonal mutated gene in some samples of this branch
- TP53 Subclonal mutated gene in all samples of this branch
- TP53 Clonality information unavailable in some samples of this branch
- TP53 Amplified gene in all samples of this branch
- TP53 Deleted gene in all samples of this branch

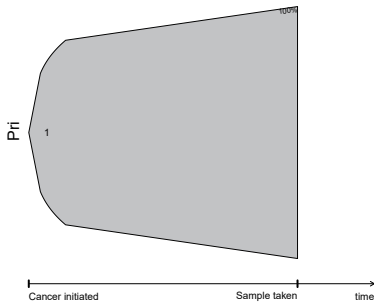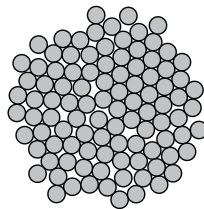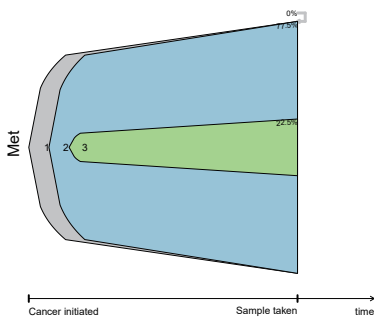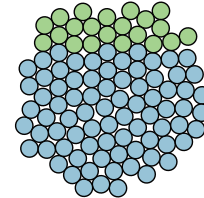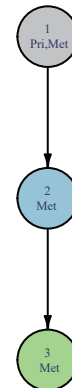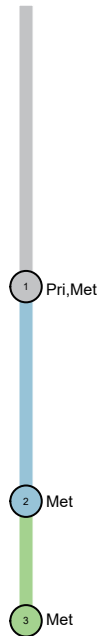

- 1: Del\_ARID1A; Del\_CDKN2A; Del\_THY1; Del\_FBXW7; Del\_MLH1; Del\_NFKBIA; Del\_CADM1; Del\_RASSF1; Del\_TRAF3; Del\_JAK2; Del\_CDKN2B;
- 2: KLF6; Del\_NOTCH1; Del\_MSH6; Amp\_AKT2; CYC1
- 3: KMT2B

- Unique location
- Multiple location

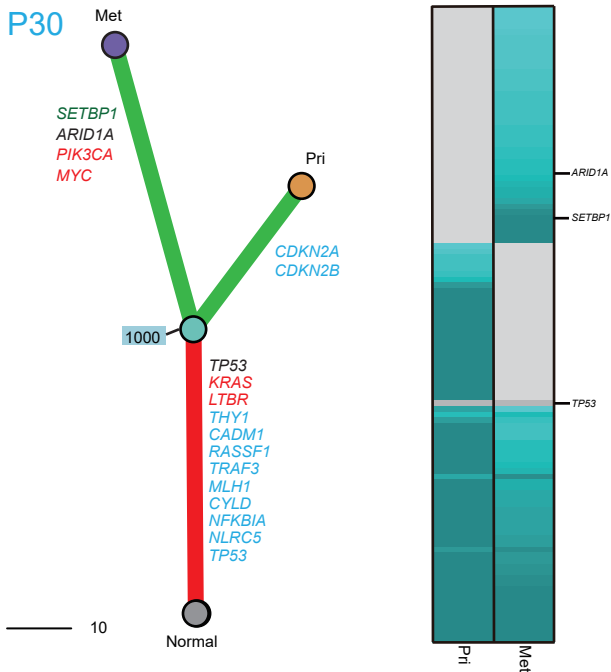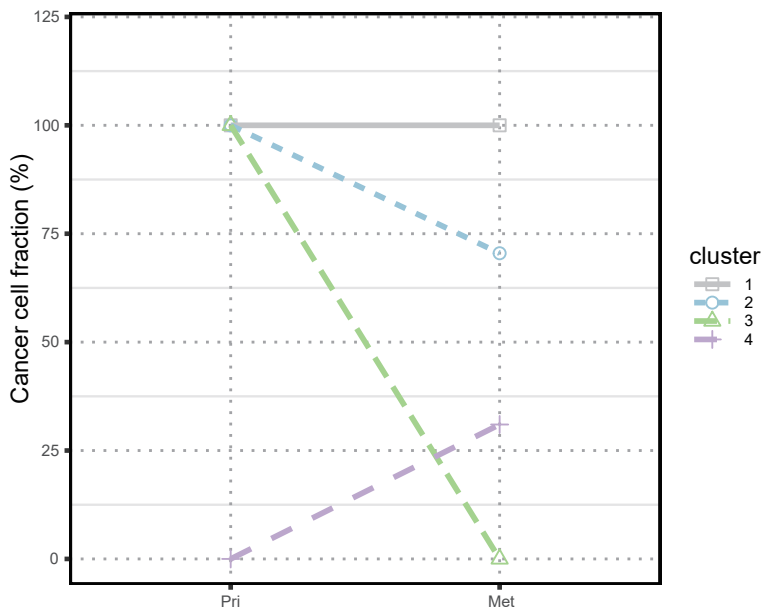

- Primary tumor
- Progressed tumor
- Normal tissue
- Primary tumor
- Lymphatic metastasis
- Distant metastasis
- Evolution node
- Signature 1 (Age)
- Signature 2 (APOBEC)
- Signature 13 (APOBEC)
- Signature 4 (Tobacco)
- Signature 5 (Unknown)
- Signature 6 (Mismatch repair)
- NA

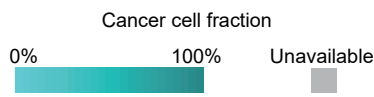

- TP53 Clonal mutated gene in all samples of this branch
- TP53 Clonal mutated gene in some samples of this branch
- TP53 Subclonal mutated gene in all samples of this branch
- TP53 Clonality information unavailable in some samples of this branch
- TP53 Amplificated gene in all samples of this branch
- TP53 Deleted gene in all samples of this branch

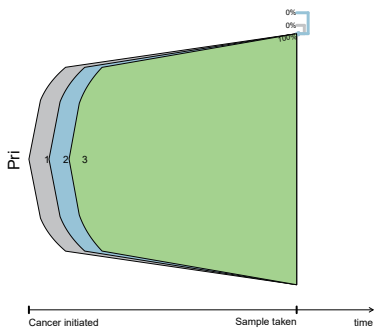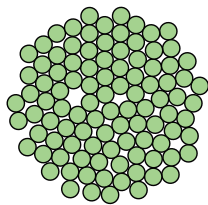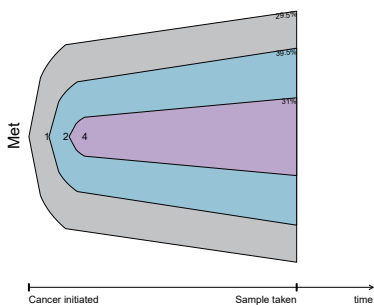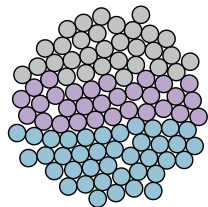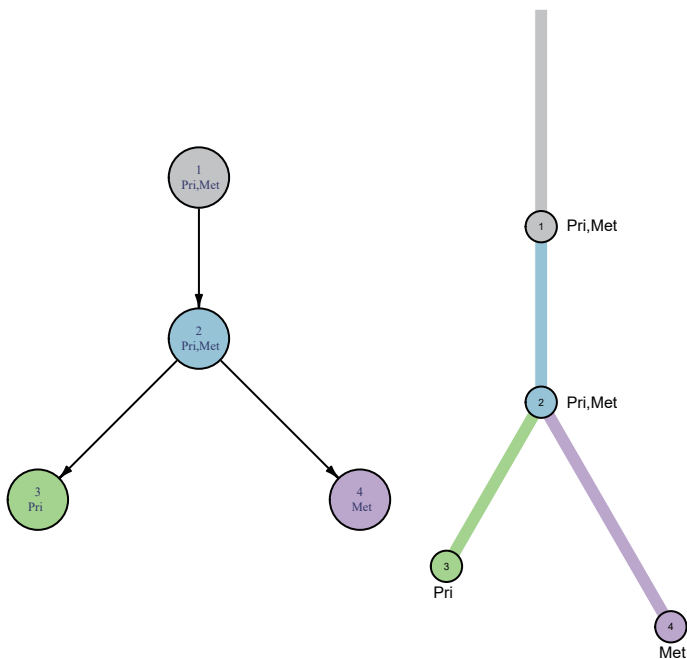

- 1: Del\_NLRC5;Del\_THY1;Del\_MLH1;Del\_NFKBIA;Del\_CADM1  
Del\_RASSF1;Del\_CYLD;Del\_TRAF3;Del\_TP53;
- 2: NULL
- 3: Del\_MED12L;Del\_JAK2
- 4: ARID1A

- Unique location
- Multiple location

P31

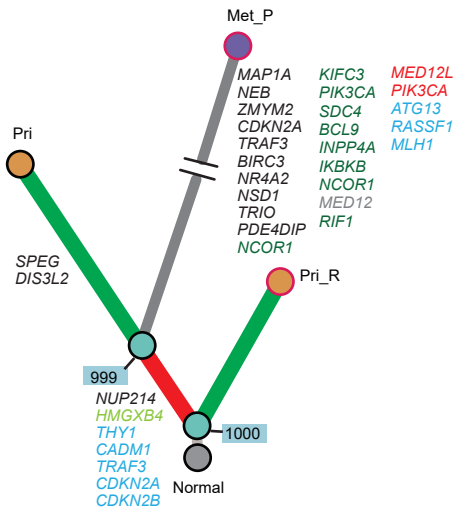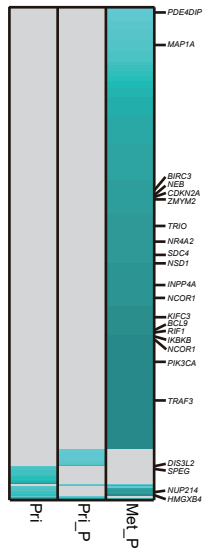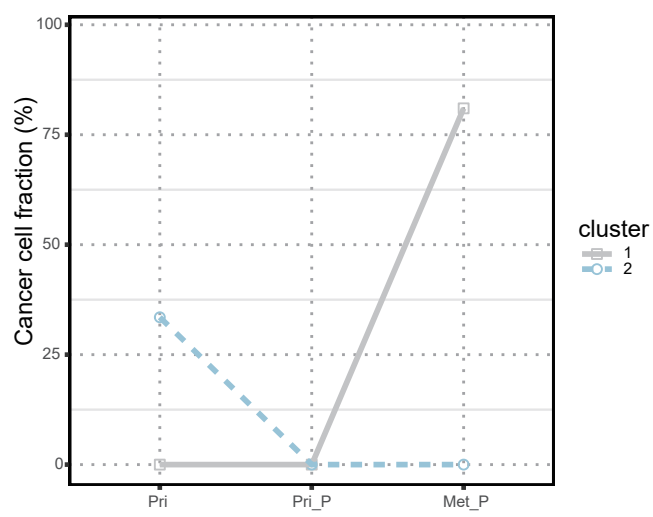

10

- Primary tumor
- Progressed tumor
- Normal tissue
- Primary tumor
- Lymphatic metastasis
- Distant metastasis
- Evolution node
- Signature 1 (Age)
- Signature 2 (APOBEC)
- Signature 13 (APOBEC)
- Signature 4 (Tobacco)
- Signature 5 (Unknown)
- Signature 6 (Mismatch repair)
- NA

- Cancer cell fraction
- 0% 100% Unavailable
- TP53 Clonal mutated gene in all samples of this branch
  - TP53 Clonal mutated gene in some samples of this branch
  - TP53 Subclonal mutated gene in all samples of this branch
  - TP53 Clonality information unavailable in some samples of this branch
  - TP53 Amplified gene in all samples of this branch
  - TP53 Deleted gene in all samples of this branch

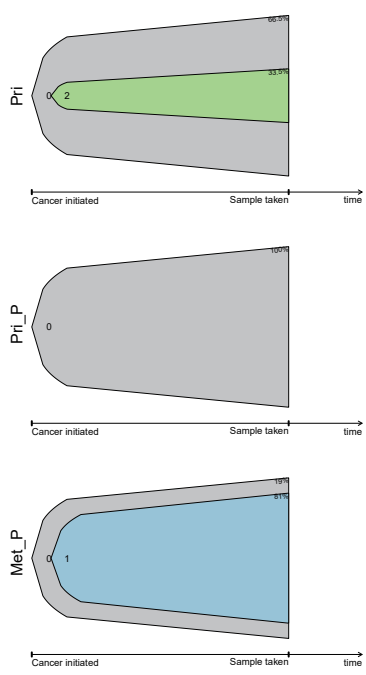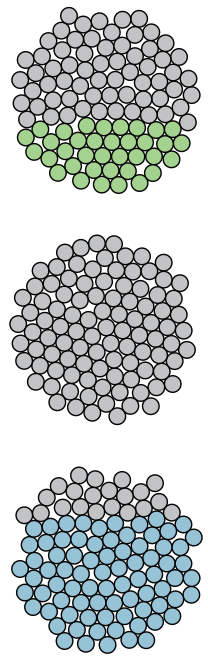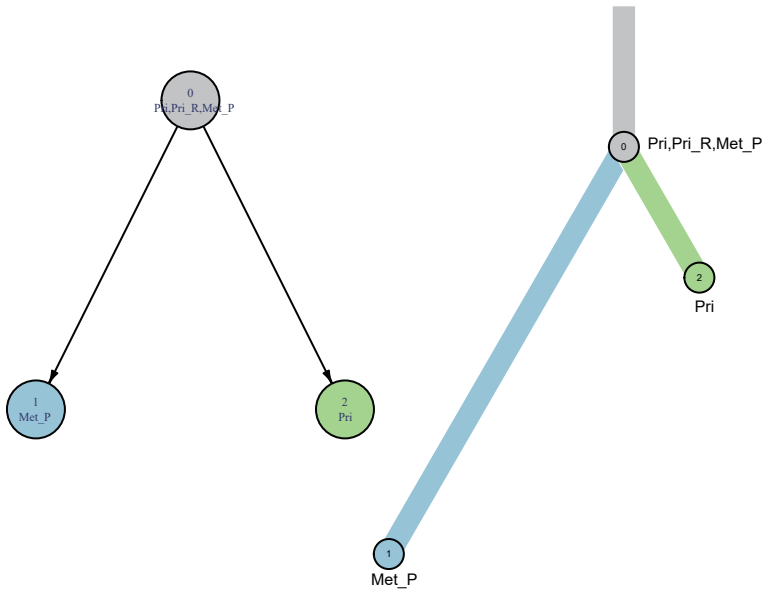

● 0: NULL

- 1: Del\_MLH1;ZMYM2;NCOR1;PIK3CA;TRAF3  
NSD1;Amp\_MED12L;Del\_RASSF1;MAP1A;KIFC3  
Amp\_PIK3CA;Del\_ATG13;BIRC3;

● 2: SPEG

- Unique location
- Multiple location

af

P32

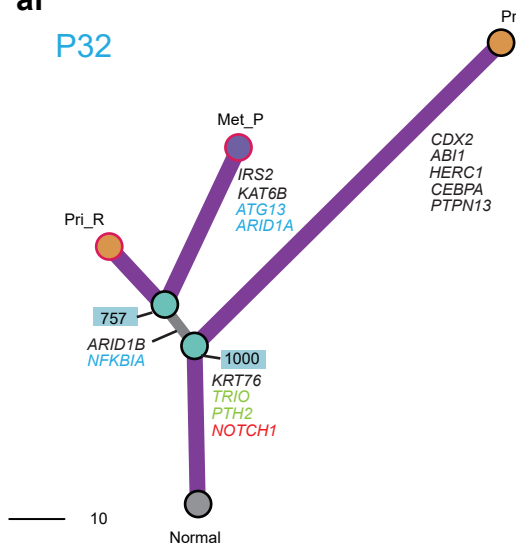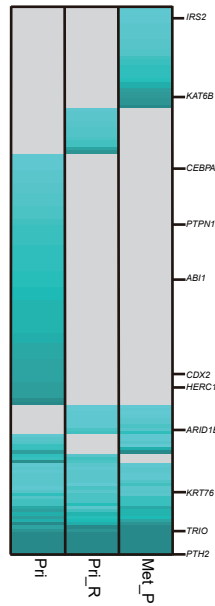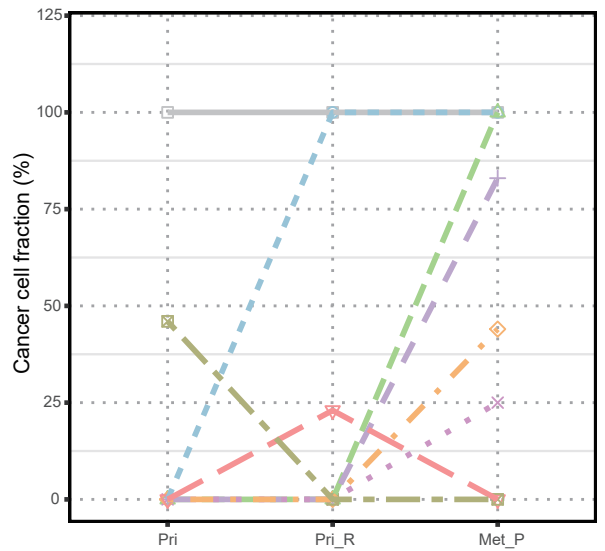

cluster

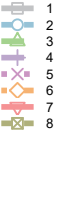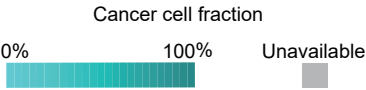

- Primary tumor
- Progressed tumor
- Normal tissue
- Primary tumor
- Lymphatic metastasis
- Distant metastasis
- Evolution node
- Signature 1 (Age)
- Signature 2 (APOBEC)
- Signature 13 (APOBEC)
- Signature 4 (Tobacco)
- Signature 5 (Unknown)
- Signature 6 (Mismatch repair)
- NA

- TP53 Clonal mutated gene in all samples of this branch
- TP53 Clonal mutated gene in some samples of this branch
- TP53 Subclonal mutated gene in all samples of this branch
- TP53 Clonality information unavailable in some samples of this branch
- TP53 Amplificated gene in all samples of this branch
- TP53 Deleted gene in all samples of this branch

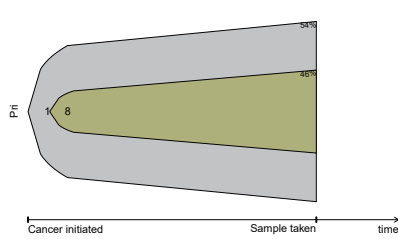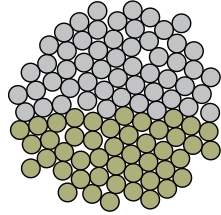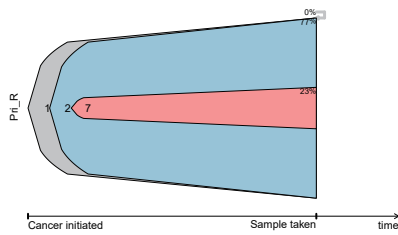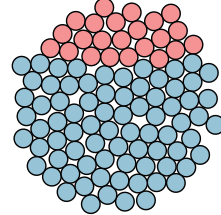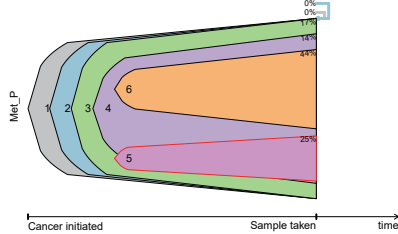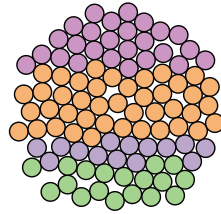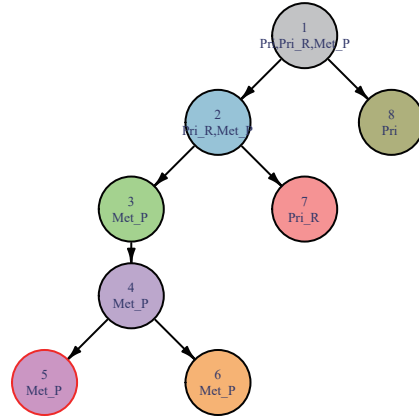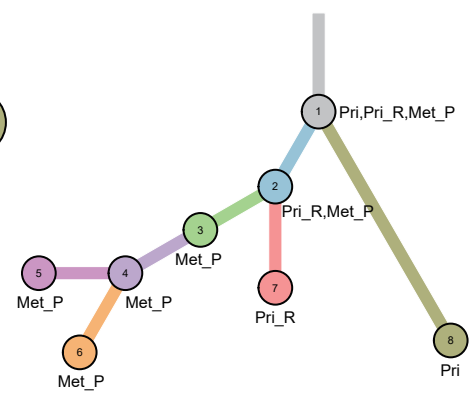

- 1: Amp\_NOTCH1;PTH2
- 2: Del\_NFKBIA;Amp\_CDKN2A;Amp\_CDKN2B
- 3: Del\_ARID1A;Del\_EP300;Del\_ATG13
- 4: KAT6B
- 5: NULL
- 6: NULL
- 7: NULL
- 8: CEBPA;CDX2;HERC1;ABI1;PTPN13

- Unique location
- Multiple location

ag

P33

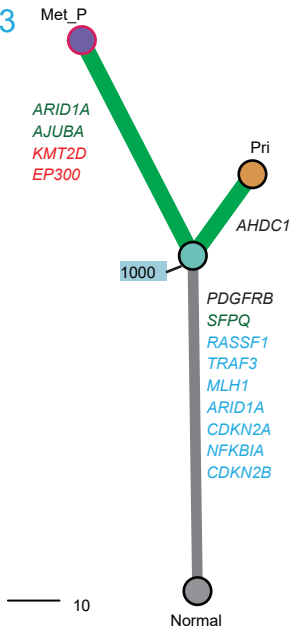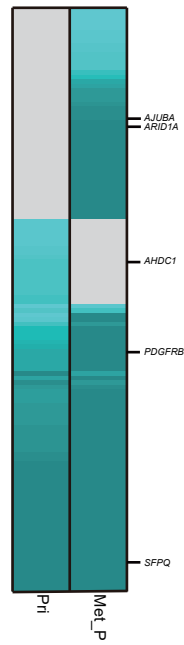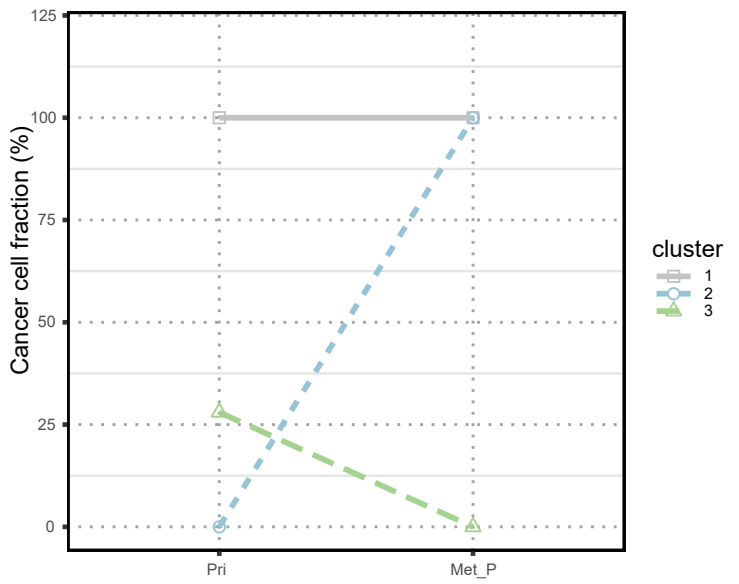

- Primary tumor
- Progressed tumor
- Normal tissue
- Primary tumor
- Lymphatic metastasis
- Distant metastasis
- Evolution node
- Signature 1 (Age)
- Signature 2 (APOBEC)
- Signature 13 (APOBEC)
- Signature 4 (Tobacco)
- Signature 5 (Unknown)
- Signature 6 (Mismatch repair)
- NA

- Cancer cell fraction
- 0% 100% Unavailable
- TP53 Clonal mutated gene in all samples of this branch
  - TP53 Clonal mutated gene in some samples of this branch
  - TP53 Subclonal mutated gene in all samples of this branch
  - TP53 Clonality information unavailable in some samples of this branch
  - TP53 Amplificated gene in all samples of this branch
  - TP53 Deleted gene in all samples of this branch

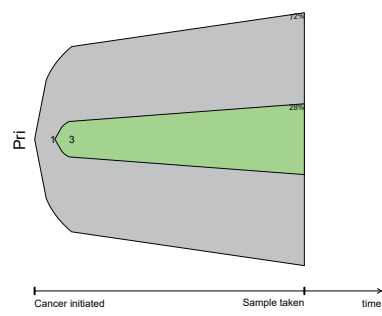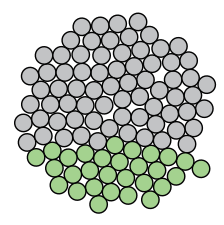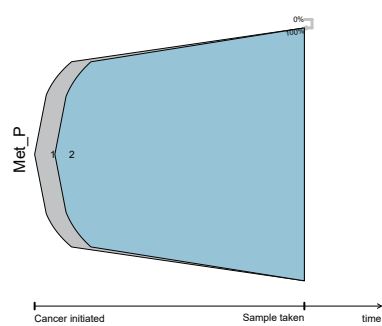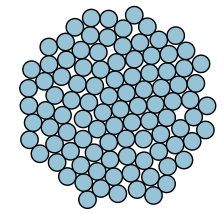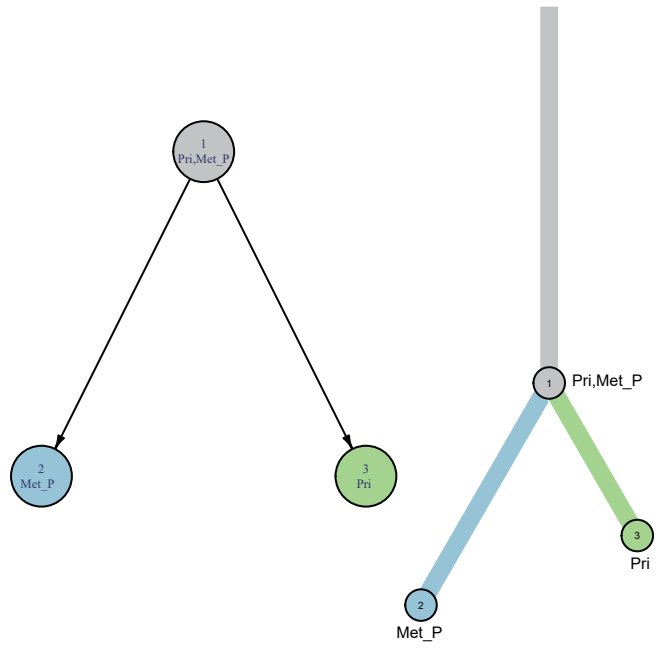

- 1: SFPQ
- 2: Del\_CDKN2A;Amp\_KMT2D;Amp\_EP300;Amp\_ATG13;Del\_CDKN2B
- 3: AHDC1

- Unique location
- Multiple location

ah

P34

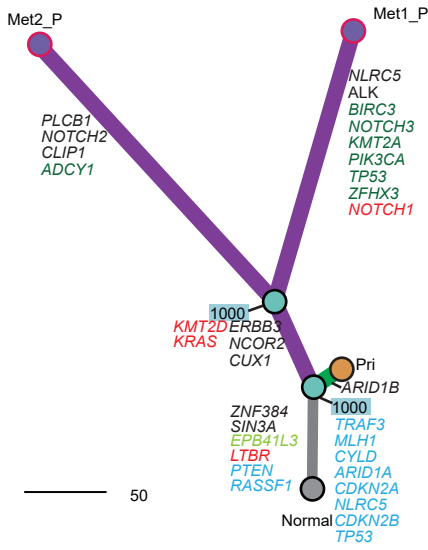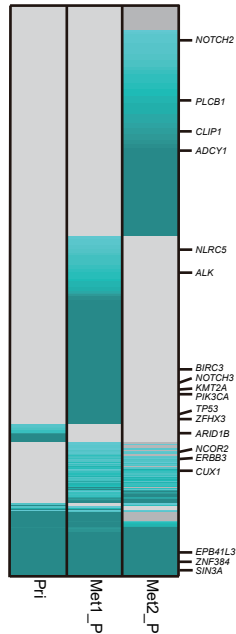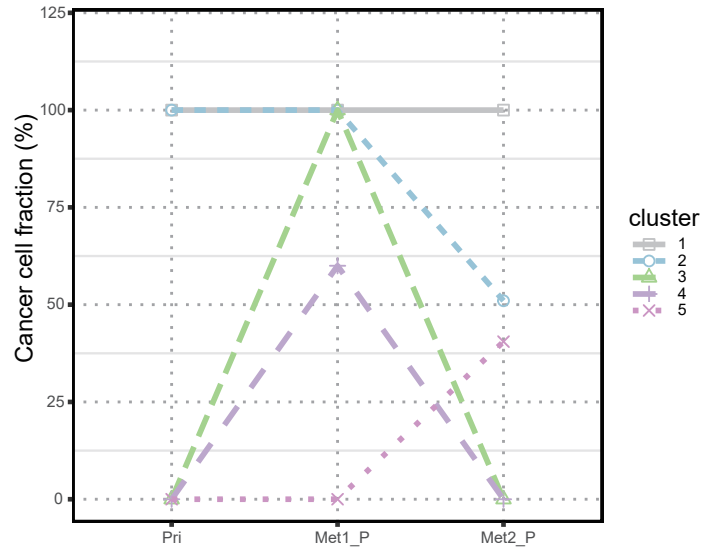

- Primary tumor
- Progressed tumor
- Normal tissue
- Primary tumor
- Lymphatic metastasis
- Distant metastasis
- Evolution node
- Signature 1 (Age)
- Signature 2 (APOBEC)
- Signature 13 (APOBEC)
- Signature 4 (Tobacco)
- Signature 5 (Unknown)
- Signature 6 (Mismatch repair)
- NA

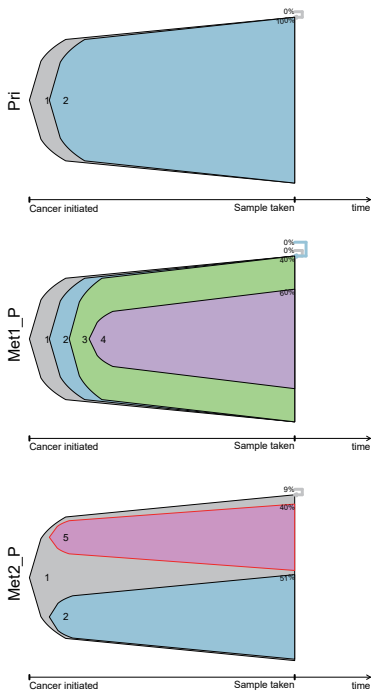

- 1: ZNF384;SIN3A;EPB41L3
- 2: Del\_PTEN;Del\_ARID1A;Del\_CDKN2A;Del\_NLRC5;Del\_RASSF1;Del\_CYLD;Del\_TP53;Del\_CDKN2B;
- 3: ZFHX3;Amp\_NOTCH1;KMT2A;PIK3CA;TP53;BIRC3;
- 4: NULL
- 5: NOTCH2;ALK;CLIP1;Del\_NOTCH1;AHNAK2;NLRC5;FN1;ADCY1;PLCB1;ACTB;ACTG1;

Cancer cell fraction

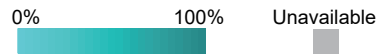

- TP53 Clonal mutated gene in all samples of this branch
- TP53 Clonal mutated gene in some samples of this branch
- TP53 Subclonal mutated gene in all samples of this branch
- TP53 Clonality information unavailable in some samples of this branch
- TP53 Amplified gene in all samples of this branch
- TP53 Deleted gene in all samples of this branch

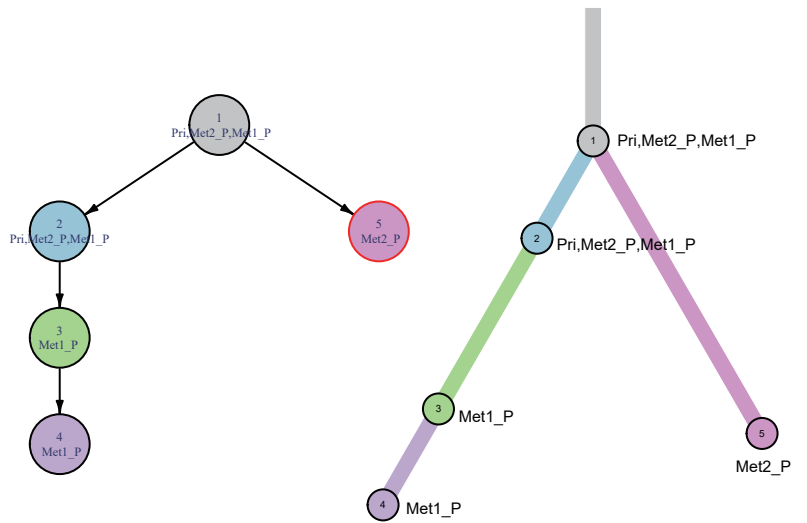

- Unique location
- Multiple location



ai

P35

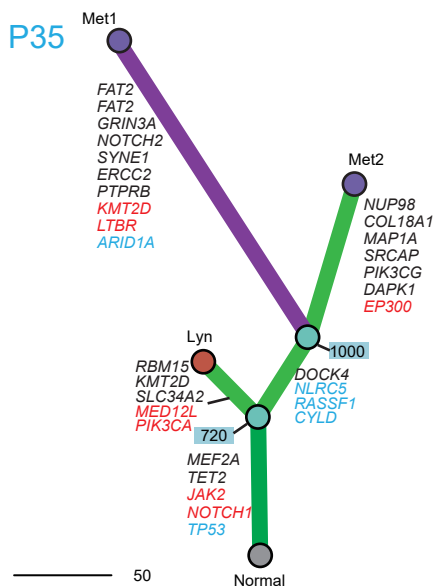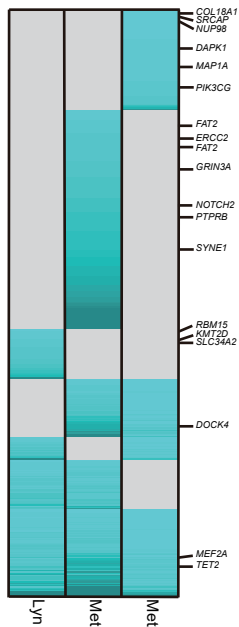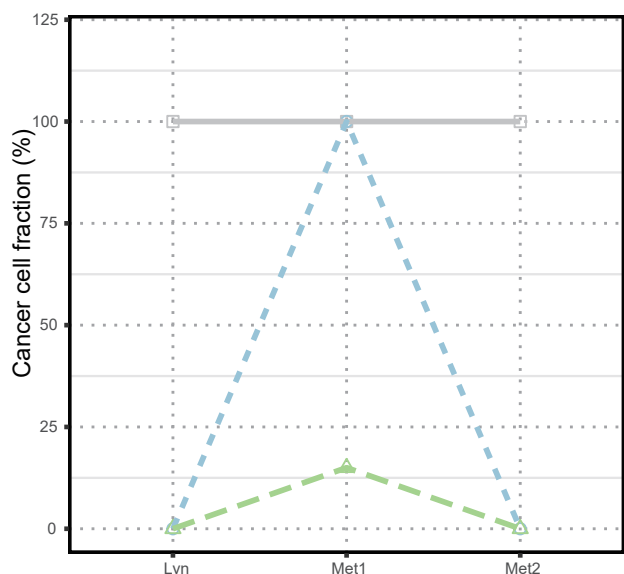

- Primary tumor
- Progressed tumor
- Normal tissue
- Primary tumor
- Lymphatic metastasis
- Distant metastasis
- Evolution node
- Signature 1 (Age)
- Signature 2 (APOBEC)
- Signature 13 (APOBEC)
- Signature 4 (Tobacco)
- Signature 5 (Unknown)
- Signature 6 (Mismatch repair)
- NA

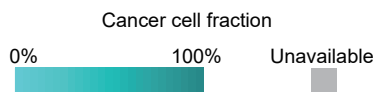

- TP53 Clonal mutated gene in all samples of this branch
- TP53 Clonal mutated gene in some samples of this branch
- TP53 Subclonal mutated gene in all samples of this branch
- TP53 Clonality information unavailable in some samples of this branch
- TP53 Amplified gene in all samples of this branch
- TP53 Deleted gene in all samples of this branch

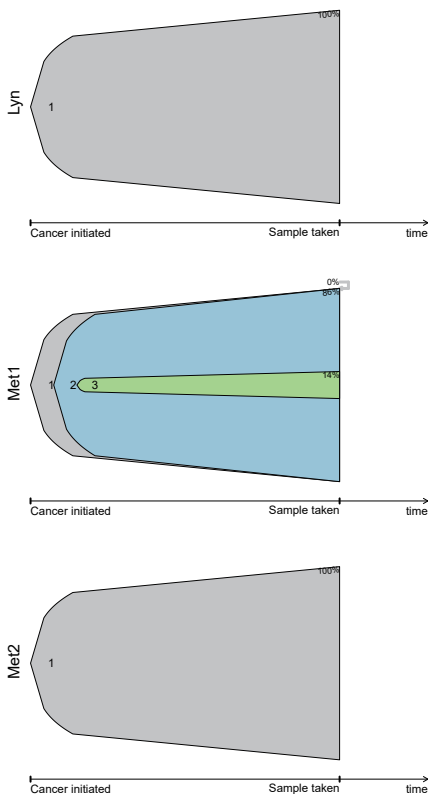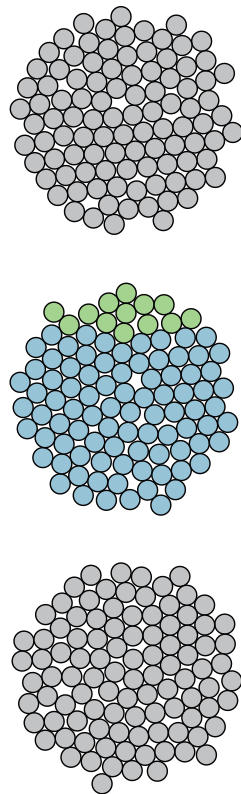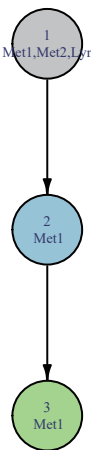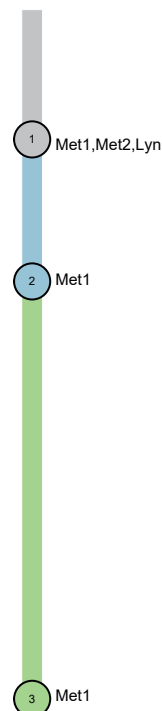

- 1: Amp\_NOTCH1;Amp\_JAK2;Amp\_CDKN2A;Del\_TP53;Amp\_CDKN2B
- 2: Del\_ARID1A;Amp\_KMT2D;Amp\_LTBR  
NOTCH2;KMT2D;COL18A1;SLC34A2;RBM15
- 3: SRCAP;DAPK1;AHNAK2;PIK3CG;SYNE1  
PTPRB;GRIN3A;MAP1A;ERCC2;FAT2  
NUP98;

- Unique location
- Multiple location

### **Supplementary Fig. 11. Evolution analysis of each patient.**

Evolution analysis for 35 patients. A phylogenetic tree was constructed for each patient (top left figure for each patient). For each branch, key variants are highlighted in the tree, including clonal mutated driver genes in all samples (dark green), clonal mutated driver genes in some samples (light green), subclonal mutated driver genes in all samples (black), and mutated driver genes with unclear clonality (grey) as well as key amplified or deleted driver genes (red and blue). Bootstrap values are marked on each divergence node, and dominant signatures (contribution  $> 0.5$ ) of each branch are mapped in different colours (except the branches that contain less than 10 mutations or had no dominant signature detected). The top middle figures for each patient show the fraction of tumour cells with shared and private mutations for each tumour sample, and key mutations are also marked. The top right figures show the CCF flow of each mutation cluster (subclones) according to each sample. The bottom left figures show the subclone-based evolution architecture of each sample and their sampling transect, which reflect the fractions of each subclone at the time of sampling. The bottom right two figures show the evolution architecture of subclones in node-based and branch-based trees. The black boundary subclones in the node-based tree indicate that these subclones are located in a unique place of the architecture, whereas the red subclones indicate that the subclones are so small that they could be placed in multiple locations without penalty (see Method). Driver variants are also listed for each subclone.

**SUPPLEMENTARY TABLES**

**Supplementary Table 1. Clinical data of the sequenced NPC cohort.**

| Type               | Group           | Frequency | Percent |
|--------------------|-----------------|-----------|---------|
| Age                | Median (yrs)    |           | 42      |
| Sex                | Female          | 4         | 9.09%   |
|                    | Male            | 40        | 90.91%  |
| Smoking            | No              | 27        | 61.36%  |
|                    | Yes             | 17        | 38.64%  |
| T stage            | 1               | 2         | 4.55%   |
|                    | 2               | 4         | 9.09%   |
|                    | 3               | 17        | 38.64%  |
|                    | 4               | 21        | 47.73%  |
| N stage            | 1               | 7         | 15.91%  |
|                    | 2               | 14        | 31.82%  |
|                    | 3               | 23        | 52.27%  |
| M stage            | 0               | 9         | 20.45%  |
|                    | 1               | 35        | 79.55%  |
| Disease stage      | II              | 1         | 2.27%   |
|                    | III             | 2         | 4.55%   |
|                    | IVa             | 5         | 13.63%  |
|                    | IVb             | 35        | 79.55%  |
| Progression status | no              | 10        | 22.73%  |
|                    | yes             | 34        | 77.27%  |
| PFS                | Median (months) |           | 12      |

**Supplementary Table 2. Single cell RNA sequencing information.**

| Patient | Sample | UMI (mean) | Genes (mean) | UMI (std) | Genes (std) | Cells |
|---------|--------|------------|--------------|-----------|-------------|-------|
| P14     | Pri    | 4763.9     | 1203.1       | 5931.7    | 847.1       | 4921  |
|         | LLN    | 2983.2     | 938.9        | 3615.9    | 615.7       | 1954  |
|         | RLN    | 3217       | 962.7        | 2561.3    | 466.1       | 3074  |
|         | Liver  | 7335.2     | 1473.2       | 11502.2   | 1218.9      | 3156  |
|         | Bone   | 4203.6     | 1019.9       | 6380      | 837.8       | 478   |
|         | ILN    | 2694.8     | 811.1        | 2533.2    | 494.3       | 6102  |
| P15     | Pri    | 4428.3     | 1131.8       | 5811      | 895.3       | 4868  |
|         | LLN    | 3665.2     | 966.3        | 2934.5    | 468.3       | 6809  |
|         | RLN    | 3877.3     | 1081.1       | 3246.5    | 484.8       | 7172  |
|         | LALN   | 3559.5     | 981.4        | 2579.2    | 485.3       | 7886  |
|         | RALN   | 4952.8     | 1195.1       | 5989.2    | 807.7       | 7493  |

**Supplementary Table 3. Key image characteristics of the training and validation datasets.**

| Type                                   | Lymphatic median(range) | Hematogenous median(range) | P value*  |
|----------------------------------------|-------------------------|----------------------------|-----------|
| <b>Training dataset (n = 13)</b>       |                         |                            |           |
| Axial maximum diameter of tumor (mm)   | 19.4 (14.9-46.4)        | 48.9 (28-53.2)             | 0.006216  |
| Coronal maximum diameter (mm)          | 22.75 (16.1-47)         | 53.7 (38-64.8)             | 0.003108  |
| Sagittal maximum diameter (mm)         | 18.7 (10.7-64.7)        | 48.7 (35.2-74.1)           | 0.010878  |
| Number of lower cervical lymph nodes   | 14.5 (5-22)             | 5 (0-12)                   | 0.0225166 |
| Number of organ metastasis             | 2 (0-9)                 | 6 (0-52)                   | 0.2370052 |
| Number of bone metastasis              | 18 (0-27)               | 0 (0-7)                    | 0.0594305 |
| <b>Metastatic NPC cohort (n = 104)</b> |                         |                            |           |
| Axial maximum diameter of tumor(mm)    | 34.35 (14.1-59.0)       | 39.55 (29.9-66.1)          | 0.03881   |
| Coronal maximum diameter (mm)          | 32.15 (13.5-67.5)       | 38.15 (25.7-69.4)          | 0.012888  |
| Sagittal maximum diameter (mm)         | 27.7 (4.12-63.9)        | 35.3 (20.1-62.1)           | 0.039573  |
| Number of lower cervical lymph nodes   | 3 (0-33)                | 2.5 (0-6)                  | 0.09207   |
| Number of organ metastasis             | 1 (1-4)                 | 1 (0-3)                    | 0.950072  |
| Number of bone metastasis              | 3 (0-5)                 | 1.5 (0-5)                  | 0.513893  |
| <b>M0 stage NPC cohort (n = 201)</b>   |                         |                            |           |
| Axial maximum diameter of tumor(mm)    | 18 (5-48)               | 28 (8-71)                  | 1.657E-09 |
| Coronal maximum diameter (mm)          | 19 (5-48)               | 28 (7-61)                  | 2.158E-09 |
| Sagittal maximum diameter (mm)         | 19 (5-70)               | 25.5 (8-59)                | 4.267E-11 |
| Number of lower cervical lymph nodes   | 0 (0-6)                 | 0 (0-7)                    | 0.0374658 |
| <b>Immunotherapy cohort (n = 66)</b>   |                         |                            |           |
| Axial maximum diameter of tumor(mm)    | 31 (9.5-40)             | 37.15 (19.9-58.5)          | 0.0123199 |
| Coronal maximum diameter (mm)          | 34.9 (15.9-46.2)        | 36.2 (13.1-60.3)           | 0.3505177 |
| Sagittal maximum diameter (mm)         | 28.5 (13.1-44.4)        | 35.3 (13.7-60.9)           | 0.0390839 |
| Number of lower cervical lymph nodes   | 2 (0-8)                 | 0 (0-10)                   | 0.051894  |

\*P value was calculated using Wilcoxon signed-rank test (two-sided).

**Supplementary Table 4. Clinical characteristics of the de novo metastatic NPC cohort used for the validation of the radiomics prediction model (N = 104 individuals).**

| Type                         | Group              | Frequency | Percent   |
|------------------------------|--------------------|-----------|-----------|
| Metastatic route             | Lymphatic route    | 78        | 75.0%     |
|                              | Hematogenous route | 26        | 25.0%     |
| Local-regional radiotherapy  | Yes                | 50        | 48.1%     |
|                              | No                 | 54        | 51.9%     |
| Age, years                   | Media (IQR)        |           | 37.0-52.0 |
| Gender                       | Male               | 87        | 83.7%     |
|                              | Female             | 17        | 16.3%     |
| Smoking                      | Yes                | 32        | 30.8%     |
|                              | No                 | 72        | 69.2%     |
| KPS score                    | Median (IQR)       |           | 90-90     |
| Pathology (WHO)              | I/II               | 5         | 4.8%      |
|                              | III                | 99        | 95.2%     |
| T stage                      | 1-2                | 12        | 11.5%     |
|                              | 3-4                | 92        | 88.5%     |
| N stage                      | 0-1                | 22        | 21.2%     |
|                              | 2-3                | 82        | 78.8%     |
| Bone metastases              | No                 | 27        | 26.0%     |
|                              | Yes                | 77        | 74.0%     |
| Liver metastases             | No                 | 73        | 70.2%     |
|                              | Yes                | 31        | 29.8%     |
| Lung metastases              | No                 | 74        | 71.10%    |
|                              | Yes                | 30        | 28.90%    |
| Number of metastatic lesions | 1-2                | 31        | 30.00%    |
|                              | $\geq 3$           | 73        | 70.00%    |

**Supplementary Table 5. Comparison of clinicopathologic features of the training and de novo metastatic NPC cohorts.**

| Category and variable      | training cohort<br>(n = 13) | validation cohort<br>(n=104) | P value*           |
|----------------------------|-----------------------------|------------------------------|--------------------|
| Age                        | 46.0 (38.5-51.0)            | 47.0 (36.5-53.0)             | 0.423 <sup>a</sup> |
| Sex                        |                             |                              | 0.455              |
| Female                     | 1(7.7%)                     | 15(14.4%)                    |                    |
| Male                       | 12(92.3%)                   | 89(85.6%)                    |                    |
| Number of metastatic sites |                             |                              | 0.327              |
| Single                     | 5(38.5%)                    | 28(26.9%)                    |                    |
| Multiple                   | 8(61.5%)                    | 76(73.1%)                    |                    |
| Liver involvement          |                             |                              | 0.053              |
| No                         | 6(46.2%)                    | 72(69.2%)                    |                    |
| Yes                        | 7(53.8%)                    | 32(30.8%)                    |                    |
| Treatment                  |                             |                              | 0.257              |
| CT+RT                      | 4(30.8%)                    | 46(44.2%)                    |                    |
| CT                         | 9(69.2%)                    | 58(55.8%)                    |                    |
| Group                      |                             |                              | 0.388              |
| Lymphatic                  | 78(75.0%)                   | 8(61.5%)                     |                    |
| Hematogenous               | 26(25.0%)                   | 5(38.5%)                     |                    |

\*P value was calculated using Chi-square test (two-sided). <sup>a</sup> P value was calculated using two-sided t test. CT: Chemotherapy; RT: Radiotherapy.

**Supplementary Table 6. Clinical characteristics of the M0-stage nasopharyngeal carcinoma cohort used for the validation of the radiomics prediction model (N=201 individuals).**

| Type             | Group              | Frequency | Percent |
|------------------|--------------------|-----------|---------|
| Metastatic route | Lymphatic route    | 113       | 56.22%  |
|                  | Hematogenous route | 88        | 43.78%  |
| Age              | Median (IQR)       | 45        | 38-53   |
| KPS              | Median (IQR)       | 90        | 90-90   |
| Gender           | Male               | 144       | 71.64%  |
|                  | Female             | 57        | 28.36%  |
| Pathology (WHO)  | I/II               | 8         | 3.98%   |
|                  | III                | 193       | 96.02%  |
| T stage          | 1-2                | 92        | 45.77%  |
|                  | 3-4                | 109       | 54.23%  |
| N stage          | 0-1                | 147       | 73.13%  |
|                  | 2-3                | 54        | 26.87%  |
| Chemotherapy     | No                 | 18        | 8.96%   |
|                  | Yes                | 183       | 91.04%  |



**Supplementary Table 7. Clinical characteristics of the immunotherapy NPC cohort (N = 66 individuals).**

| Type                               | Lymphatic route<br>(n=52) | Hematogenous<br>route (n=14) | P value*           |
|------------------------------------|---------------------------|------------------------------|--------------------|
| Stage                              |                           |                              | 0.766              |
| Primary metastases                 | 1                         | 0                            |                    |
| Recurrence with distant metastases | 43                        | 11                           |                    |
| Local regional-recurrence          | 8                         | 3                            |                    |
| Age, years                         |                           |                              | 0.899 <sup>a</sup> |
| Median (IQR)                       | 47 (35.0-56.0)            | 44 (37.0-53.0)               |                    |
| Gender                             |                           |                              | 0.73               |
| Male                               | 40                        | 10                           |                    |
| Female                             | 12                        | 4                            |                    |
| Smoking                            |                           |                              | 0.971              |
| Yes                                | 22                        | 6                            |                    |
| No                                 | 30                        | 8                            |                    |
| KPS score                          |                           |                              | 1 <sup>a</sup>     |
| Median (IQR)                       | 90 (90-90)                | 90 (90-90)                   |                    |
| Pathology (WHO)                    |                           |                              | 1                  |
| I/II                               | 2                         | 0                            |                    |
| III                                | 50                        | 14                           |                    |

\*P values were calculated by Chi-square test. <sup>a</sup> P value was calculated using two-sided t test.

**Supplementary Table 8. Multivariate analysis assessing the risk factors for PFS in the de novo metastatic NPC cohort.**

| Category and variable      | PFS<br>HR (95% CI)  | PFS<br>P value* |
|----------------------------|---------------------|-----------------|
| Age                        | 0.978 (0.955-1.003) | 0.082           |
| Sex                        |                     |                 |
| Female                     | Ref                 |                 |
| Male                       | 0.894(0.467-1.714)  | 0.737           |
| Number of metastatic sites |                     |                 |
| Single                     | Ref                 |                 |
| Multiple                   | 1.103(0.64-1.898)   | 0.725           |
| Liver involvement          |                     |                 |
| No                         | Ref                 |                 |
| Yes                        | 0.986(0.569-1.709)  | 0.96            |
| Treatment                  |                     |                 |
| CT                         | Ref                 |                 |
| CT+RT                      | 2.65(1.612-4.356)   | <0.001          |
| Group                      |                     |                 |
| Lymphatic                  | Ref                 |                 |
| Hematogenous               | 0.397(0.191-0.825)  | 0.013           |

\*P values were calculated using a Cox proportional hazards model. CT: Chemotherapy; RT: Radiotherapy.
